# Supplementary material
Source: PubMed Central journal article supplement (PMC4573827)
Supplement: NIHMS702370-supplement-supplemental_files.pdf [file NIHMS702370-supplement-supplemental_files.pdf]

## Supplemental Digital Content 1. Primary antibodies used for immunoblotting

### antibody

$\alpha$ -1-antichymotrypsin  
Anti-thrombin III  
Attractin  
Cathepsin L  
CD44  
CD276  
Cell adhesion molecule 1  
Clusterin- $\alpha$   
Complement factor H  
Fc fragment of IgG binding protein  
Fibronectin  
Fibrinopeptide A  
Galectin-3  
Kininogen  
Leucine-rich glycoprotein-1  
Neutrophil gelatinase-associated Lipocalin  
Periostin  
Reelin  
Tenascin C  
Tissue factor protease inhibitor  
Vascular cell adhesion molecule  
Vascular endothelial cell growth factor C  
Vitronectin

### company and catalog number

Novus Biologicals NBP1-58981  
Thermo Scientific PA5-29646  
Novus Biologicals NBP1-87967  
Novus Biologicals H00001514-D01P  
Abcam ab119863  
Novus Biologicals NBP1-88966  
Millipore ABT66  
Acris Antibodies AP20482PU-N  
Thermo Scientific AP5-21302  
GeneTex GTX51347  
Millipore ab1954  
Novus Biologicals NBP1-42066  
R&D Systems AF1197  
Novus Biologicals H00003827-D01P  
Novus Biologicals NBP2-24603  
Abcam ab63929  
Abcam ab14041  
Novus Biologicals NB600-1081  
Abcam ab6346  
Novus Biologicals H00003827  
Novus Biologicals H00007412-D01P  
Novus Biologicals NBP2-20853  
Novus Biologicals H00007448-D01P

## 12 Supplemental Digital Content 2.xlsx

| Peptide No | Accession No | Protein Name                                                         | Sequence                         | Modifications                                                                                               | XCorr |
|------------|--------------|----------------------------------------------------------------------|----------------------------------|-------------------------------------------------------------------------------------------------------------|-------|
| 1          | 118442839    | complement factor H-related protein 1                                | SPYEmFGDEEVmLnGnWTEPPQcK         | M5(Oxidation); M12(Oxidation); C13(Carbamidomethyl); N15(Deamidated); N17(Deamidated); C24(Carbamidomethyl) | 3.76  |
| 2          | 16418467     | leucine-rich alpha-2-glycoprotein                                    | QLDmLDLSnnSLASVPEGLWASLGQPNWdMnR | M4(Oxidation); N9(Deamidated); N10(Deamidated); M30(Oxidation)                                              | 2.63  |
| 3          | 4502261      | antithrombin-III                                                     | WVSnKTEGR                        | N4(Deamidated)                                                                                              | 2.73  |
| 4          | 530375037    | phospholipid-metabolizing enzyme A-C1                                | MQLLKDVVGNDTYRInnK               | N16(Deamidated); N17(Deamidated)                                                                            | 1.80  |
| 5          | 62243068     | insulin-like growth factor-binding protein 3                         | YKVDYESQSTDTQnFSSESK             | N14(Deamidated)                                                                                             | 2.16  |
| 6          | 13899338     | inhibin beta E chain                                                 | LQLDcRPLEGnSTVTGQPR              | C5(Carbamidomethyl); N11(Deamidated)                                                                        | 2.68  |
| 7          | 31652249     | lipopolysaccharide-binding protein                                   | LSVATnVSATLTFnTSK                | N6(Deamidated); N14(Deamidated)                                                                             | 3.99  |
| 8          | 21748616     | FLJ00385 protein                                                     | eEQFnSTFR                        | N-Term(Carbamyl); N5(Deamidated)                                                                            | 2.70  |
| 9          | 116283732    | kininogen-1                                                          | HGIQYFnnNTQHSSLFTLNEVK           | N8(Deamidated)                                                                                              | 6.68  |
| 10         | 401817558    | human IgG1 Fc                                                        | EEQYnSTYR                        | N5(Deamidated)                                                                                              | 2.47  |
| 11         | 2414494      | immunoglobulin heavy chain, constant region                          | eEQFnSTYR                        | N-Term(Carbamyl); N5(Deamidated)                                                                            | 2.53  |
| 12         | 1628395      | gamma 3 immunoglobulin constant heavy chain                          | YKnNSDISSTR                      | N3(Deamidated)                                                                                              | 3.17  |
| 13         | 184730       | Ig mu chain C region                                                 | LSLHRPALEDLLLGEAnLcTcTLTGLR      | N18(Deamidated); C21(Carbamidomethyl)                                                                       | 6.78  |
| 14         | 112950093    | Immunoglobulin heavy chain                                           | LAGKPTHVnVSVVmAEVDGTcY           | N9(Deamidated); M14(Oxidation); C21(Carbamidomethyl)                                                        | 4.56  |
| 15         | 112950093    | Immunoglobulin heavy chain                                           | GLTFQQnASSmcVPDQDTAIR            | N7(Deamidated); M11(Oxidation); C12(Carbamidomethyl)                                                        | 3.59  |
| 16         | 184730       | Ig mu chain C region                                                 | TPLTAnITK                        | N6(Deamidated)                                                                                              | 2.50  |
| 17         | 112950093    | Immunoglobulin heavy chain                                           | EEQYnSTFR                        | N5(Deamidated)                                                                                              | 2.19  |
| 18         | 21748616     | FLJ00385 protein                                                     | TKPREEQFnSTFR                    | N9(Deamidated)                                                                                              | 2.11  |
| 19         | 105990532    | apolipoprotein B-100                                                 | VHnGSEILFSYFQDLVITLPELr          | N3(Deamidated)                                                                                              | 2.61  |
| 20         | 530402456    | copper-transporting ATPase 2                                         | SIEDRISnLKGIISmK                 | N8(Deamidated); M15(Oxidation)                                                                              | 1.80  |
| 21         | 166362713    | cadherin-5                                                           | EVYPWYnLTVEAK                    | N7(Deamidated)                                                                                              | 2.92  |
| 22         | 344179112    | scavenger receptor cysteine-rich type 1 protein M130                 | APGWAnSSAGSGR                    | N6(Deamidated)                                                                                              | 1.80  |
| 23         | 184730       | Ig mu chain C region                                                 | NnSDISSTR                        | N2(Deamidated)                                                                                              | 2.66  |
| 24         | 385198102    | coiled-coil domain-containing protein 74A                            | ENKDLHYKLImnQTSQK                | M11(Oxidation); N12(Deamidated)                                                                             | 1.81  |
| 25         | 312433998    | lactotransferrin                                                     | TAGWNVPIGTLRPFnLWTGPPEPIEAAVAR   | N16(Deamidated)                                                                                             | 3.18  |
| 26         | 74027261     | serine protease inhibitor Kazal-type 5                               | ENDPVHGADGKFYnK                  | N15(Deamidated)                                                                                             | 1.85  |
| 27         | 530406451    | katanin p80 subunit B-like 1                                         | ISnFTnKnmK                       | N3(Deamidated); N6(Deamidated); N8(Deamidated); M9(Oxidation)                                               | 1.70  |
| 28         | 66346698     | alpha-N-acetylglucosaminidase                                        | VFPOVnVTK                        | N6(Deamidated)                                                                                              | 1.64  |
| 29         | 62243068     | insulin-like growth factor-binding protein 3                         | VDYESQSTDTQnFSSESK               | N12(Deamidated)                                                                                             | 1.97  |
| 30         | 530373850    | follistatin-related protein 1                                        | GSnYSEILDK                       | N3(Deamidated)                                                                                              | 1.85  |
| 31         | 530397771    | hypoxia up-regulated protein 1                                       | VFGSQnLTTVK                      | N6(Deamidated)                                                                                              | 2.70  |
| 32         | 530415917    | multiple EGF-like-domains 8                                          | ALLTnVSSVALGSR                   | N5(Deamidated)                                                                                              | 2.57  |
| 33         | 384081596    | cathepsin L1                                                         | YSVAnDTGFVDIPK                   | N5(Deamidated)                                                                                              | 1.67  |
| 34         | 148806925    | EGF, latrophilin and seven transmembrane domain-containing protein 1 | TTEFDnSTDIALK                    | N7(Deamidated)                                                                                              | 2.36  |
| 35         | 148806925    | EGF, latrophilin and seven transmembrane domain-containing protein 1 | DTLSnSTLTEFVK                    | N5(Deamidated)                                                                                              | 2.11  |

12 Supplemental Digital Content 2.xlsx

| # Missed Cleavages | Charge | m/z [Da] | MH+ [Da] | RT [min] | Survivors  |            |            |            |            |            |            |            |            |             | Survivor Avg | Survivor SEM |
|--------------------|--------|----------|----------|----------|------------|------------|------------|------------|------------|------------|------------|------------|------------|-------------|--------------|--------------|
|                    |        |          |          |          | Survivor 1 | Survivor 2 | Survivor 3 | Survivor 4 | Survivor 5 | Survivor 6 | Survivor 7 | Survivor 8 | Survivor 9 | Survivor 10 |              |              |
| 0                  | 3      | 1018.1   | 3052.2   | 57.8     | 0.014      | 0.071      | 0.014      | 0.011      | 0.015      | 0.012      | 0.016      | 0.013      | 0.013      | 0.013       | 0.019        | 0.006        |
| 0                  | 3      | 1164.5   | 3491.6   | 85.2     | 0.014      | 0.071      | 0.014      | 0.011      | 0.015      | 0.012      | 0.016      | 0.013      | 0.013      | 0.013       | 0.019        | 0.006        |
| 1                  | 3      | 359.8    | 1077.5   | 15.7     | 0.014      | 0.071      | 0.014      | 0.011      | 0.015      | 0.012      | 0.016      | 0.013      | 0.013      | 0.013       | 0.019        | 0.006        |
| 2                  | 3      | 708.4    | 2123.1   | 59.7     | 0.014      | 0.071      | 0.014      | 0.011      | 0.015      | 0.012      | 0.016      | 0.013      | 0.013      | 0.013       | 0.019        | 0.006        |
| 1                  | 3      | 782.0    | 2344.0   | 33.4     | 0.014      | 0.071      | 0.014      | 0.011      | 0.015      | 0.012      | 0.016      | 0.013      | 0.013      | 0.013       | 0.019        | 0.006        |
| 0                  | 3      | 714.7    | 2142.1   | 38.9     | 0.014      | 0.071      | 0.014      | 0.011      | 0.015      | 0.012      | 0.016      | 0.013      | 0.013      | 0.013       | 0.019        | 0.006        |
| 0                  | 2      | 878.5    | 1755.9   | 64.3     | 0.014      | 0.071      | 0.014      | 0.011      | 0.015      | 0.012      | 0.016      | 0.013      | 0.013      | 0.013       | 0.019        | 0.006        |
| 0                  | 2      | 601.3    | 1201.5   | 44.8     | 0.014      | 0.071      | 0.014      | 0.011      | 0.015      | 0.012      | 0.016      | 0.013      | 0.013      | 0.013       | 0.019        | 0.006        |
| 0                  | 3      | 864.8    | 2592.2   | 46.7     | 0.014      | 0.071      | 0.014      | 0.011      | 0.015      | 0.012      | 0.016      | 0.013      | 0.013      | 0.013       | 0.019        | 0.006        |
| 0                  | 2      | 595.8    | 1190.5   | 21.5     | 0.014      | 0.071      | 0.014      | 0.011      | 0.015      | 0.012      | 0.016      | 0.013      | 0.013      | 0.013       | 0.019        | 0.006        |
| 0                  | 2      | 609.3    | 1217.5   | 35.7     | 0.014      | 0.071      | 0.014      | 0.011      | 0.015      | 0.012      | 0.016      | 0.013      | 0.013      | 0.013       | 0.019        | 0.006        |
| 1                  | 3      | 429.2    | 1285.6   | 15.3     | 0.014      | 0.071      | 0.014      | 0.011      | 0.015      | 0.012      | 0.016      | 0.013      | 0.013      | 0.013       | 0.019        | 0.006        |
| 0                  | 3      | 988.9    | 2964.6   | 74.6     | 0.014      | 0.071      | 0.014      | 0.011      | 0.015      | 0.012      | 0.016      | 0.013      | 0.013      | 0.013       | 0.019        | 0.006        |
| 0                  | 3      | 788.7    | 2364.1   | 46.4     | 0.014      | 0.071      | 0.014      | 0.011      | 0.015      | 0.012      | 0.016      | 0.013      | 0.013      | 0.013       | 0.019        | 0.006        |
| 0                  | 3      | 786.0    | 2356.1   | 43.4     | 0.014      | 0.071      | 0.014      | 0.011      | 0.015      | 0.012      | 0.016      | 0.013      | 0.013      | 0.013       | 0.019        | 0.006        |
| 0                  | 2      | 480.3    | 959.5    | 28.5     | 0.014      | 0.071      | 0.014      | 0.011      | 0.015      | 0.012      | 0.016      | 0.013      | 0.013      | 0.013       | 0.019        | 0.006        |
| 0                  | 2      | 587.8    | 1174.5   | 31.7     | 0.014      | 0.071      | 0.014      | 0.011      | 0.015      | 0.012      | 0.016      | 0.013      | 0.013      | 0.013       | 0.019        | 0.006        |
| 1                  | 4      | 411.0    | 1640.8   | 22.4     | 0.014      | 0.071      | 0.014      | 0.011      | 0.015      | 0.012      | 0.016      | 0.013      | 0.013      | 0.013       | 0.019        | 0.006        |
| 0                  | 3      | 946.8    | 2838.5   | 98.5     | 0.014      | 0.071      | 0.014      | 0.011      | 0.015      | 0.012      | 0.016      | 0.013      | 0.013      | 0.013       | 0.019        | 0.006        |
| 2                  | 3      | 607.7    | 1821.0   | 63.7     | 0.014      | 0.071      | 0.014      | 0.011      | 0.015      | 0.012      | 0.016      | 0.013      | 0.013      | 0.013       | 0.019        | 0.006        |
| 0                  | 2      | 806.9    | 1612.8   | 60.6     | 0.014      | 0.071      | 0.014      | 0.011      | 0.015      | 0.012      | 0.016      | 0.013      | 0.013      | 0.013       | 0.019        | 0.006        |
| 0                  | 2      | 609.8    | 1218.5   | 23.2     | 0.014      | 0.071      | 0.014      | 0.011      | 0.015      | 0.012      | 0.016      | 0.013      | 0.013      | 0.013       | 0.019        | 0.006        |
| 0                  | 2      | 497.7    | 994.4    | 15.5     | 0.014      | 0.071      | 0.014      | 0.011      | 0.015      | 0.012      | 0.016      | 0.013      | 0.013      | 0.013       | 0.019        | 0.006        |
| 2                  | 4      | 527.5    | 2107.1   | 64.6     | 0.014      | 0.071      | 0.014      | 0.011      | 0.015      | 0.012      | 0.016      | 0.013      | 0.013      | 0.013       | 0.019        | 0.006        |
| 0                  | 3      | 1077.9   | 3231.7   | 78.7     | 0.014      | 0.071      | 0.014      | 0.011      | 0.015      | 0.012      | 0.016      | 0.013      | 0.013      | 0.013       | 0.019        | 0.006        |
| 1                  | 4      | 449.0    | 1792.8   | 58.6     | 0.014      | 0.071      | 0.014      | 0.011      | 0.015      | 0.012      | 0.016      | 0.013      | 0.013      | 0.013       | 0.019        | 0.006        |
| 1                  | 2      | 608.3    | 1215.6   | 30.2     | 0.014      | 0.071      | 0.014      | 0.011      | 0.015      | 0.012      | 0.016      | 0.013      | 0.013      | 0.013       | 0.019        | 0.006        |
| 0                  | 2      | 516.8    | 1032.6   | 36.2     | 0.014      | 0.071      | 0.014      | 0.011      | 0.015      | 0.012      | 0.016      | 0.013      | 0.013      | 0.013       | 0.019        | 0.006        |
| 0                  | 2      | 1026.9   | 2052.9   | 32.4     | 0.014      | 0.071      | 0.014      | 0.011      | 0.015      | 0.012      | 0.016      | 0.013      | 0.013      | 0.013       | 0.019        | 0.006        |
| 0                  | 2      | 563.8    | 1126.5   | 36.2     | 0.014      | 0.071      | 0.014      | 0.011      | 0.015      | 0.012      | 0.016      | 0.013      | 0.013      | 0.013       | 0.019        | 0.006        |
| 0                  | 2      | 597.8    | 1194.6   | 36.4     | 0.014      | 0.071      | 0.014      | 0.011      | 0.015      | 0.012      | 0.016      | 0.013      | 0.013      | 0.013       | 0.019        | 0.006        |
| 0                  | 2      | 694.9    | 1388.8   | 52.9     | 0.014      | 0.071      | 0.014      | 0.011      | 0.015      | 0.012      | 0.016      | 0.013      | 0.013      | 0.013       | 0.019        | 0.006        |
| 0                  | 2      | 763.9    | 1526.7   | 50.8     | 0.014      | 0.071      | 0.014      | 0.011      | 0.015      | 0.012      | 0.016      | 0.013      | 0.013      | 0.013       | 0.019        | 0.006        |
| 0                  | 2      | 778.9    | 1556.7   | 42.7     | 0.014      | 0.071      | 0.014      | 0.011      | 0.015      | 0.012      | 0.016      | 0.013      | 0.013      | 0.013       | 0.019        | 0.006        |
| 0                  | 2      | 728.4    | 1455.7   | 56.0     | 0.014      | 0.071      | 0.014      | 0.011      | 0.015      | 0.012      | 0.016      | 0.013      | 0.013      | 0.013       | 0.019        | 0.006        |



## 12 Supplemental Digital Content 2.xlsx

|    |           |                                                       |                                |                                                          |      |
|----|-----------|-------------------------------------------------------|--------------------------------|----------------------------------------------------------|------|
| 36 | 153082722 | intercellular adhesion molecule 2                     | GnETLHYETFGK                   | N2(Deamidated)                                           | 2.50 |
| 37 | 4557759   | myeloperoxidase                                       | RPFnVTDVLTPAQLNVLSK            | N4(Deamidated)                                           | 4.98 |
| 38 | 223633991 | pantetheinase                                         | LTGVAGnYTVcQK                  | N7(Deamidated); C11(Carbamidomethyl)                     | 1.96 |
| 39 | 557786190 | periostin                                             | EVnDTLLVNELK                   | N3(Deamidated)                                           | 2.33 |
| 40 | 126012562 | prolow-density lipoprotein receptor-related protein 1 | FnSTEYQVVTR                    | N2(Deamidated)                                           | 2.29 |
| 41 | 530422745 | coagulation factor VIII                               | NLFLTNLDNLHEnNTHNQEK           | N13(Deamidated)                                          | 2.19 |
| 42 | 4501987   | afamin                                                | HnFSHccSK                      | N2(Deamidated); C6(Carbamidomethyl); C7(Carbamidomethyl) | 2.04 |
| 43 | 530388287 | peroxidasin homolog (Drosophila)-like                 | VDSAInSTR                      | N6(Deamidated)                                           | 1.66 |
| 44 | 530379903 | protein-lysine 6-oxidase                              | RDPGAAVPGAAnASAQQPR            | N12(Deamidated)                                          | 3.14 |
| 45 | 105990532 | apolipoprotein B-100                                  | DFHSEYIVSASnFTSQLSSQVEQFLHR    | N12(Deamidated)                                          | 5.49 |
| 46 | 4502165   | apolipoprotein F                                      | nVSVEALASALQLLAR               | N1(Deamidated)                                           | 3.06 |
| 47 | 149363642 | coiled-coil domain-containing protein 144A            | DLESEISRIKTSQADFnK             | N17(Deamidated)                                          | 1.88 |
| 48 | 144922720 | coiled-coil domain-containing protein 15              | nQQPASFmR                      | N1(Deamidated); M8(Oxidation)                            | 1.70 |
| 49 | 117320518 | complement factor H-related protein 4                 | LGYnAnTSVLSFOAVcR              | N4(Deamidated); N6(Deamidated); C16(Carbamidomethyl)     | 2.25 |
| 50 | 134288859 | glycosyltransferase 6 domain-containing protein 1     | NGLnSTYEKHLnK                  | N4(Deamidated); N12(Deamidated)                          | 1.86 |
| 51 | 154146191 | heat shock protein HSP 90-alpha                       | DLVILLYETALLSSGFSLDPOQTHAnR    | N26(Deamidated)                                          | 1.85 |
| 52 | 530377712 | ecto-ADP-ribosyltransferase 3                         | ITLIPLNEVFOVSQEGAGNNLIQSiNk    | N27(Deamidated)                                          | 1.96 |
| 53 | 530414045 | endothelial lipase                                    | IEONATnTFLVYTEEDLGDLLK         | N7(Deamidated)                                           | 2.40 |
| 54 | 530395269 | hemopexin                                             | cSDGWSFDATTLDDnGTMlFFK         | C1(Carbamidomethyl); N15(Deamidated); M18(Oxidation)     | 1.97 |
| 55 | 21450863  | attractin                                             | cInQSIcEK                      | C1(Carbamidomethyl); N3(Deamidated); C7(Carbamidomethyl) | 1.99 |
| 56 | 4504489   | histidine-rich glycoprotein                           | IADAHLDREnTTVYYLVLDVQESDcSVLSR | N11(Deamidated); C26(Carbamidomethyl)                    | 3.28 |
| 57 | 300244535 | interleukin-6 receptor subunit beta                   | SHLQnYTvnATK                   | N5(Deamidated); N9(Deamidated)                           | 1.98 |
| 58 | 189181724 | proteoglycan 4                                        | nGTLVAFR                       | N1(Deamidated)                                           | 1.92 |
| 59 | 62530391  | selenoprotein P                                       | cGncSLTTLK                     | C1(Carbamidomethyl); N3(Deamidated); C4(Carbamidomethyl) | 2.20 |
| 60 | 189458817 | transferrin receptor protein 1                        | DFEDLYTPVnGSMIVR               | N10(Deamidated)                                          | 3.60 |
| 61 | 167466198 | intercellular adhesion molecule 1                     | LNPTVTYnGnDSFSAK               | N9(Deamidated)                                           | 3.06 |
| 62 | 530426931 | coagulation factor X                                  | GDNnLTR                        | N4(Deamidated)                                           | 1.93 |
| 63 | 355594753 | clusterin                                             | mLnTSSLLEQLNEQFNWVSR           | M1(Oxidation); N3(Deamidated)                            | 5.79 |
| 64 | 4504489   | histidine-rich glycoprotein                           | VEntTVYYLVLDVQESDcSVLSR        | N3(Deamidated); C18(Carbamidomethyl)                     | 5.17 |
| 65 | 4502163   | apolipoprotein D                                      | ADGTVnQIEGEATPvnLTEPAK         | N6(Deamidated); N16(Deamidated)                          | 5.13 |
| 66 | 530417477 | IgGfC-binding protein                                 | YLPVnSLLTSDcSER                | N5(Deamidated); C13(Carbamidomethyl)                     | 3.86 |
| 67 | 4557485   | ceruloplasmin                                         | ELHHLQEQnVSNAFLDK              | N9(Deamidated)                                           | 6.39 |
| 68 | 262050538 | inter-alpha-trypsin inhibitor heavy chain H4          | KAFITnFSmIDGmTYPGIK            | N6(Deamidated); M9(Oxidation); M14(Oxidation)            | 5.18 |
| 69 | 189163530 | alpha-1-antitrypsin                                   | QLAHQSnSTNIFFSPVSIATAFmLSLGTK  | N7(Deamidated); M24(Oxidation)                           | 7.62 |
| 70 | 27754778  | ficolin-3                                             | VELEDFNGnR                     | N9(Deamidated)                                           | 2.86 |
| 71 | 530417477 | IgGfC-binding protein                                 | VTVRPGESVmVnISAK               | M10(Oxidation); N12(Deamidated)                          | 4.09 |
| 72 | 543871461 | noelin                                                | VQnmSOSIEVLDR                  | N3(Deamidated); M4(Oxidation)                            | 2.64 |
| 73 | 115298678 | complement C3                                         | TVLTPATnHmGnVTFITIPANR         | N8(Deamidated); M10(Oxidation); N12(Deamidated)          | 4.12 |
| 74 | 4502161   | apolipoprotein C-IV                                   | mKELLETVVnR                    | M1(Oxidation); N10(Deamidated)                           | 3.01 |
| 75 | 48255943  | CD44 antigen                                          | AFnSTLPTmAQmEK                 | N3(Deamidated); M9(Oxidation); M12(Oxidation)            | 1.90 |
| 76 | 39725934  | pigment epithelium-derived factor                     | VTQnLTLIEESLTSEFIHDIDR         | N4(Deamidated)                                           | 6.13 |
| 77 | 223633991 | pantetheinase                                         | mTGSGIYAPnSSR                  | M1(Oxidation); N10(Deamidated)                           | 2.48 |
| 78 | 530417477 | IgGfC-binding protein                                 | LLISSLESASPVSILSOADnTSKK       | N21(Deamidated)                                          | 4.75 |

12 Supplemental Digital Content 2.xlsx

|   |   |        |        |      |        |        |        |        |        |        |        |        |        |        |        |       |  |
|---|---|--------|--------|------|--------|--------|--------|--------|--------|--------|--------|--------|--------|--------|--------|-------|--|
| 0 | 3 | 466.2  | 1396.6 | 32.0 | 0.014  | 0.071  | 0.014  | 0.011  | 0.015  | 0.012  | 0.016  | 0.013  | 0.013  | 0.013  | 0.019  | 0.006 |  |
| 0 | 3 | 705.1  | 2113.2 | 63.2 | 0.014  | 0.071  | 0.014  | 0.011  | 0.015  | 0.012  | 0.016  | 0.013  | 0.013  | 0.013  | 0.019  | 0.006 |  |
| 0 | 2 | 706.3  | 1411.7 | 31.8 | 0.014  | 0.071  | 0.014  | 0.011  | 0.015  | 0.012  | 0.016  | 0.013  | 0.013  | 0.013  | 0.019  | 0.006 |  |
| 0 | 2 | 694.4  | 1387.7 | 52.8 | 0.014  | 0.071  | 0.014  | 0.011  | 0.015  | 0.012  | 0.016  | 0.013  | 0.013  | 0.013  | 0.019  | 0.006 |  |
| 0 | 2 | 672.8  | 1344.6 | 36.7 | 0.014  | 0.071  | 0.014  | 0.011  | 0.015  | 0.012  | 0.016  | 0.013  | 0.013  | 0.013  | 0.019  | 0.006 |  |
| 0 | 4 | 603.0  | 2409.1 | 43.5 | 0.014  | 0.071  | 0.014  | 0.011  | 0.015  | 0.012  | 0.016  | 0.013  | 0.013  | 0.013  | 0.019  | 0.006 |  |
| 0 | 3 | 393.2  | 1177.5 | 14.3 | 0.014  | 0.071  | 0.014  | 0.011  | 0.015  | 0.012  | 0.016  | 0.013  | 0.013  | 0.013  | 0.019  | 0.006 |  |
| 0 | 2 | 482.2  | 963.5  | 20.4 | 0.014  | 0.071  | 0.014  | 0.011  | 0.015  | 0.012  | 0.016  | 0.013  | 0.013  | 0.013  | 0.019  | 0.006 |  |
| 1 | 3 | 612.3  | 1834.9 | 23.4 | 0.014  | 0.071  | 0.014  | 0.011  | 0.015  | 0.012  | 0.016  | 0.013  | 0.013  | 0.013  | 0.019  | 0.006 |  |
| 0 | 4 | 790.1  | 3157.5 | 80.5 | 0.014  | 0.071  | 0.014  | 0.011  | 0.015  | 0.012  | 0.016  | 0.013  | 0.013  | 0.013  | 0.019  | 0.006 |  |
| 0 | 3 | 552.6  | 1655.9 | 88.7 | 0.014  | 0.071  | 0.014  | 0.011  | 0.015  | 0.012  | 0.016  | 0.013  | 0.013  | 0.013  | 0.019  | 0.006 |  |
| 2 | 3 | 694.7  | 2082.0 | 62.4 | 0.014  | 0.071  | 0.014  | 0.011  | 0.015  | 0.012  | 0.016  | 0.013  | 0.013  | 0.013  | 0.019  | 0.006 |  |
| 0 | 2 | 548.2  | 1095.5 | 41.0 | 0.014  | 0.071  | 0.014  | 0.011  | 0.015  | 0.012  | 0.016  | 0.013  | 0.013  | 0.013  | 0.019  | 0.006 |  |
| 0 | 2 | 951.5  | 1901.9 | 54.6 | 0.014  | 0.071  | 0.014  | 0.011  | 0.015  | 0.012  | 0.016  | 0.013  | 0.013  | 0.013  | 0.019  | 0.006 |  |
| 1 | 3 | 507.2  | 1519.7 | 34.1 | 0.014  | 0.071  | 0.014  | 0.011  | 0.015  | 0.012  | 0.016  | 0.013  | 0.013  | 0.013  | 0.019  | 0.006 |  |
| 0 | 3 | 1001.9 | 3003.5 | 95.9 | 0.014  | 0.071  | 0.014  | 0.011  | 0.015  | 0.012  | 0.016  | 0.013  | 0.013  | 0.013  | 0.019  | 0.006 |  |
| 0 | 3 | 1018.6 | 3053.6 | 83.4 | 0.014  | 0.071  | 0.014  | 0.011  | 0.015  | 0.012  | 0.016  | 0.013  | 0.013  | 0.013  | 0.019  | 0.006 |  |
| 0 | 3 | 843.1  | 2527.2 | 85.0 | 0.014  | 0.071  | 0.014  | 0.011  | 0.015  | 0.012  | 0.016  | 0.013  | 0.013  | 0.013  | 0.019  | 0.006 |  |
| 0 | 2 | 1273.0 | 2545.1 | 75.0 | 0.014  | 0.071  | 0.014  | 0.011  | 0.015  | 0.012  | 0.016  | 0.013  | 0.013  | 0.013  | 0.019  | 0.006 |  |
| 0 | 2 | 576.8  | 1152.5 | 21.5 | 0.014  | 0.071  | 0.014  | 0.011  | 0.015  | 0.012  | 0.016  | 0.013  | 0.013  | 0.013  | 0.019  | 0.006 |  |
| 1 | 4 | 896.2  | 3581.7 | 72.7 | 0.014  | 0.071  | 0.014  | 0.011  | 0.015  | 0.012  | 0.016  | 0.013  | 0.013  | 0.013  | 0.019  | 0.006 |  |
| 0 | 3 | 459.9  | 1377.7 | 24.4 | 0.014  | 0.071  | 0.014  | 0.011  | 0.015  | 0.012  | 0.016  | 0.013  | 0.013  | 0.013  | 0.019  | 0.006 |  |
| 0 | 2 | 439.7  | 878.5  | 37.5 | 0.014  | 0.071  | 0.014  | 0.011  | 0.015  | 0.012  | 0.016  | 0.013  | 0.013  | 0.013  | 0.019  | 0.006 |  |
| 0 | 2 | 577.8  | 1154.5 | 26.2 | 0.014  | 0.071  | 0.014  | 0.011  | 0.015  | 0.012  | 0.016  | 0.013  | 0.013  | 0.013  | 0.019  | 0.006 |  |
| 0 | 2 | 969.5  | 1938.0 | 69.8 | 0.014  | 0.071  | 0.014  | 0.011  | 0.015  | 0.012  | 0.016  | 0.013  | 0.013  | 0.013  | 0.019  | 0.006 |  |
| 0 | 2 | 807.9  | 1614.8 | 39.8 | 0.014  | 0.071  | 0.014  | 0.011  | 0.015  | 1.190  | 0.016  | 0.013  | 1.274  | 1.318  | 0.394  | 0.190 |  |
| 0 | 2 | 395.7  | 790.4  | 15.2 | 1.433  | 0.071  | 1.370  | 1.122  | 0.015  | 0.012  | 0.016  | 0.013  | 1.274  | 1.318  | 0.664  | 0.215 |  |
| 0 | 2 | 1213.6 | 2426.2 | 82.7 | 7.167  | 0.071  | 1.370  | 10.098 | 4.499  | 3.570  | 9.410  | 3.922  | 11.468 | 10.543 | 6.212  | 1.286 |  |
| 0 | 3 | 897.4  | 2690.3 | 76.2 | 2.867  | 0.071  | 0.014  | 3.366  | 1.500  | 3.570  | 0.016  | 3.922  | 2.549  | 1.318  | 1.919  | 0.487 |  |
| 0 | 2 | 1128.6 | 2256.1 | 49.7 | 8.601  | 14.215 | 8.218  | 14.587 | 13.497 | 8.331  | 15.684 | 10.460 | 11.468 | 13.178 | 11.824 | 0.885 |  |
| 0 | 2 | 921.4  | 1841.9 | 49.5 | 1.433  | 0.071  | 1.370  | 1.122  | 1.500  | 1.190  | 1.568  | 1.307  | 2.549  | 3.954  | 1.606  | 0.322 |  |
| 0 | 3 | 675.0  | 2023.0 | 38.6 | 28.669 | 35.539 | 27.393 | 20.197 | 25.494 | 26.184 | 21.957 | 19.612 | 30.583 | 19.768 | 25.539 | 1.663 |  |
| 1 | 3 | 798.4  | 2393.2 | 67.2 | 4.300  | 0.071  | 2.739  | 4.488  | 0.015  | 4.761  | 4.705  | 6.537  | 2.549  | 6.589  | 3.675  | 0.734 |  |
| 0 | 4 | 800.4  | 3198.6 | 87.4 | 7.167  | 7.108  | 1.370  | 11.220 | 11.997 | 9.521  | 25.094 | 11.767 | 12.743 | 6.589  | 10.458 | 1.957 |  |
| 0 | 2 | 597.3  | 1193.5 | 35.9 | 2.867  | 0.071  | 2.739  | 2.244  | 1.500  | 1.190  | 1.568  | 1.307  | 1.274  | 2.636  | 1.740  | 0.277 |  |
| 0 | 3 | 568.6  | 1703.9 | 34.1 | 2.867  | 0.071  | 1.370  | 1.122  | 1.500  | 2.380  | 3.137  | 2.615  | 5.097  | 6.589  | 2.675  | 0.613 |  |
| 0 | 2 | 768.4  | 1535.7 | 35.1 | 1.433  | 0.071  | 1.370  | 1.122  | 0.015  | 1.190  | 0.016  | 0.013  | 1.274  | 1.318  | 0.782  | 0.207 |  |
| 0 | 3 | 758.4  | 2273.1 | 47.5 | 34.403 | 71.077 | 39.720 | 38.150 | 34.491 | 27.374 | 29.799 | 28.764 | 34.405 | 25.039 | 36.322 | 4.137 |  |
| 1 | 3 | 450.2  | 1348.7 | 34.9 | 1.433  | 0.071  | 1.370  | 1.122  | 2.999  | 1.190  | 1.568  | 1.307  | 2.549  | 1.318  | 1.493  | 0.252 |  |
| 0 | 2 | 801.4  | 1601.7 | 33.4 | 0.014  | 0.071  | 0.014  | 1.122  | 0.015  | 0.012  | 1.568  | 0.013  | 1.274  | 1.318  | 0.542  | 0.215 |  |
| 0 | 3 | 858.8  | 2574.3 | 81.7 | 7.167  | 0.071  | 4.109  | 11.220 | 8.998  | 11.902 | 10.979 | 13.075 | 6.371  | 11.861 | 8.575  | 1.309 |  |
| 0 | 2 | 679.3  | 1357.6 | 23.2 | 0.014  | 0.071  | 0.014  | 0.011  | 0.015  | 2.380  | 0.016  | 0.013  | 0.013  | 0.013  | 0.256  | 0.236 |  |
| 1 | 3 | 859.5  | 2576.4 | 57.5 | 0.014  | 0.071  | 0.014  | 0.011  | 0.015  | 2.380  | 0.016  | 1.307  | 1.274  | 1.318  | 0.642  | 0.271 |  |

## 12 Supplemental Digital Content 2.xlsx

|        |        |        |        |        |        |        |        |        |        |        |       |       |        |
|--------|--------|--------|--------|--------|--------|--------|--------|--------|--------|--------|-------|-------|--------|
| 0.010  | 0.019  | 0.015  | 0.012  | 0.012  | 0.013  | 0.014  | 0.015  | 0.014  | 1.381  | 0.151  | 0.137 | 0.350 | p<0.05 |
| 0.010  | 0.019  | 0.015  | 0.012  | 0.012  | 0.013  | 0.014  | 0.015  | 0.014  | 1.381  | 0.151  | 0.137 | 0.350 | p<0.05 |
| 0.010  | 0.019  | 0.015  | 0.012  | 0.012  | 0.013  | 0.014  | 0.015  | 0.014  | 1.381  | 0.151  | 0.137 | 0.350 | p<0.05 |
| 0.010  | 0.019  | 0.015  | 0.012  | 0.012  | 0.013  | 0.014  | 0.015  | 0.014  | 1.381  | 0.151  | 0.137 | 0.350 | p<0.05 |
| 0.010  | 0.019  | 0.015  | 0.012  | 0.012  | 1.316  | 0.014  | 0.015  | 0.014  | 0.014  | 0.144  | 0.130 | 0.351 | p<0.05 |
| 0.010  | 0.019  | 0.015  | 0.012  | 1.213  | 0.013  | 0.014  | 0.015  | 0.014  | 0.014  | 0.134  | 0.120 | 0.352 | p<0.05 |
| 0.010  | 0.019  | 0.015  | 1.166  | 0.012  | 0.013  | 0.014  | 0.015  | 0.014  | 0.014  | 0.129  | 0.115 | 0.353 | p<0.05 |
| 0.010  | 0.019  | 0.015  | 1.166  | 0.012  | 0.013  | 0.014  | 0.015  | 0.014  | 0.014  | 0.129  | 0.115 | 0.353 | p<0.05 |
| 0.010  | 0.019  | 0.015  | 1.166  | 0.012  | 0.013  | 0.014  | 0.015  | 0.014  | 0.014  | 0.129  | 0.115 | 0.353 | p<0.05 |
| 0.010  | 0.019  | 0.015  | 1.166  | 0.012  | 0.013  | 0.014  | 0.015  | 0.014  | 0.014  | 0.129  | 0.115 | 0.353 | p<0.05 |
| 0.010  | 0.019  | 0.015  | 1.166  | 0.012  | 0.013  | 0.014  | 0.015  | 0.014  | 0.014  | 0.129  | 0.115 | 0.353 | p<0.05 |
| 0.010  | 0.019  | 0.015  | 1.166  | 0.012  | 0.013  | 0.014  | 0.015  | 0.014  | 0.014  | 0.129  | 0.115 | 0.353 | p<0.05 |
| 0.010  | 0.019  | 0.015  | 1.166  | 0.012  | 0.013  | 0.014  | 0.015  | 0.014  | 0.014  | 0.129  | 0.115 | 0.353 | p<0.05 |
| 0.010  | 0.019  | 0.015  | 1.166  | 0.012  | 0.013  | 0.014  | 0.015  | 0.014  | 0.014  | 0.129  | 0.115 | 0.353 | p<0.05 |
| 0.010  | 0.019  | 0.015  | 1.166  | 0.012  | 0.013  | 0.014  | 0.015  | 0.014  | 0.014  | 0.129  | 0.115 | 0.353 | p<0.05 |
| 1.000  | 0.019  | 0.015  | 0.012  | 0.012  | 0.013  | 0.014  | 0.015  | 0.014  | 0.014  | 0.113  | 0.099 | 0.356 | p<0.05 |
| 1.000  | 0.019  | 0.015  | 0.012  | 0.012  | 0.013  | 0.014  | 0.015  | 0.014  | 0.014  | 0.113  | 0.099 | 0.356 | p<0.05 |
| 1.000  | 0.019  | 0.015  | 0.012  | 0.012  | 0.013  | 0.014  | 0.015  | 0.014  | 0.014  | 0.113  | 0.099 | 0.356 | p<0.05 |
| 1.000  | 0.019  | 0.015  | 0.012  | 0.012  | 0.013  | 0.014  | 0.015  | 0.014  | 0.014  | 0.113  | 0.099 | 0.356 | p<0.05 |
| 1.000  | 0.019  | 0.015  | 0.012  | 0.012  | 0.013  | 0.014  | 0.015  | 0.014  | 0.014  | 0.113  | 0.099 | 0.356 | p<0.05 |
| 1.000  | 0.019  | 0.015  | 0.012  | 0.012  | 0.013  | 0.014  | 0.015  | 0.014  | 0.014  | 0.113  | 0.099 | 0.356 | p<0.05 |
| 1.000  | 0.019  | 0.015  | 0.012  | 0.012  | 0.013  | 0.014  | 0.015  | 0.014  | 0.014  | 0.113  | 0.099 | 0.356 | p<0.05 |
| 1.000  | 0.019  | 0.015  | 0.012  | 0.012  | 0.013  | 0.014  | 0.015  | 0.014  | 0.014  | 0.113  | 0.099 | 0.356 | p<0.05 |
| 1.000  | 0.019  | 0.015  | 0.012  | 0.012  | 0.013  | 0.014  | 0.015  | 0.014  | 0.014  | 0.113  | 0.099 | 0.356 | p<0.05 |
| 0.010  | 1.886  | 1.532  | 1.166  | 1.213  | 1.316  | 1.386  | 1.501  | 1.395  | 0.014  | 1.142  | 0.199 | 0.014 |        |
| 1.000  | 0.019  | 0.015  | 0.012  | 0.012  | 0.013  | 0.014  | 0.015  | 0.014  | 0.014  | 0.113  | 0.099 | 0.031 |        |
| 23.000 | 13.203 | 3.064  | 3.497  | 19.404 | 21.053 | 22.170 | 3.003  | 18.135 | 5.524  | 13.205 | 2.710 | 0.032 |        |
| 9.000  | 3.772  | 0.015  | 3.497  | 4.851  | 6.579  | 6.928  | 1.501  | 2.790  | 1.381  | 4.032  | 0.892 | 0.052 |        |
| 12.000 | 15.089 | 16.849 | 11.658 | 12.127 | 10.527 | 15.242 | 13.513 | 18.135 | 19.335 | 14.448 | 0.941 | 0.057 |        |
| 0.010  | 0.019  | 0.015  | 2.332  | 1.213  | 1.316  | 1.386  | 0.015  | 0.014  | 1.381  | 0.770  | 0.270 | 0.062 |        |
| 14.000 | 18.862 | 27.572 | 18.653 | 20.617 | 23.685 | 24.941 | 21.020 | 22.320 | 23.478 | 21.515 | 1.204 | 0.066 |        |
| 1.000  | 3.772  | 3.064  | 4.663  | 0.012  | 2.632  | 0.014  | 1.501  | 2.790  | 0.014  | 1.946  | 0.532 | 0.073 |        |
| 16.000 | 11.317 | 3.064  | 19.819 | 14.553 | 27.633 | 22.170 | 12.011 | 11.160 | 24.860 | 16.259 | 2.349 | 0.074 |        |
| 3.000  | 3.772  | 3.064  | 2.332  | 1.213  | 1.316  | 1.386  | 6.006  | 1.395  | 4.143  | 2.763  | 0.495 | 0.088 |        |
| 0.010  | 1.886  | 1.532  | 2.332  | 1.213  | 3.948  | 0.014  | 1.501  | 1.395  | 0.014  | 1.384  | 0.386 | 0.092 |        |
| 1.000  | 1.886  | 1.532  | 1.166  | 1.213  | 1.316  | 1.386  | 1.501  | 0.014  | 1.381  | 1.239  | 0.156 | 0.095 |        |
| 30.000 | 24.520 | 27.572 | 27.979 | 30.319 | 22.369 | 30.484 | 24.023 | 32.085 | 37.289 | 28.664 | 1.390 | 0.096 |        |
| 2.000  | 0.019  | 1.532  | 1.166  | 1.213  | 0.013  | 0.014  | 1.501  | 1.395  | 0.014  | 0.887  | 0.248 | 0.103 |        |
| 0.010  | 0.019  | 0.015  | 1.166  | 0.012  | 0.013  | 0.014  | 0.015  | 0.014  | 0.014  | 0.129  | 0.115 | 0.107 |        |
| 18.000 | 16.976 | 1.532  | 13.990 | 8.489  | 14.474 | 9.699  | 9.009  | 13.950 | 13.811 | 11.993 | 1.542 | 0.108 |        |
| 1.000  | 1.886  | 0.015  | 1.166  | 1.213  | 0.013  | 1.386  | 0.015  | 0.014  | 1.381  | 0.809  | 0.228 | 0.109 |        |
| 0.010  | 0.019  | 0.015  | 0.012  | 0.012  | 1.316  | 0.014  | 0.015  | 0.014  | 0.014  | 0.144  | 0.130 | 0.115 |        |

## 12 Supplemental Digital Content 2.xlsx

|     |           |                                                      |                                      |                                                                                             |      |
|-----|-----------|------------------------------------------------------|--------------------------------------|---------------------------------------------------------------------------------------------|------|
| 79  | 355594753 | clusterin                                            | HnSTGcLR                             | N2(Deamidated); C6(Carbamidomethyl)                                                         | 2.70 |
| 80  | 4502261   | antithrombin-III                                     | SLTFnETYQDISELVYGAk                  | N5(Deamidated)                                                                              | 4.68 |
| 81  | 45580688  | complement component C7                              | INNDNFYEFYnSTWSYVK                   | N11(Deamidated)                                                                             | 4.05 |
| 82  | 38455402  | neutrophil gelatinase-associated lipocalin           | SYnVTSVLFr                           | N3(Deamidated)                                                                              | 2.80 |
| 83  | 21450863  | attractin                                            | mPSQAPTGNFYpQPLLnSSmCLEDSR           | M1(Oxidation); N17(Deamidated); M20(Oxidation); C21(Carbamidomethyl)                        | 5.18 |
| 84  | 110611237 | coagulation factor XIII B chain                      | HGVIISSTVDTYEnGSSVEYR                | N14(Deamidated)                                                                             | 5.66 |
| 85  | 27894328  | interleukin-1 receptor-like 1                        | TGYAnVTIYK                           | N5(Deamidated)                                                                              | 2.55 |
| 86  | 205277383 | hepatocyte growth factor-like protein                | GTAntTTAGVpQR                        | N4(Deamidated); C12(Carbamidomethyl)                                                        | 4.01 |
| 87  | 530366454 | C4b-binding protein alpha chain                      | LSVDKDOYVEPEnVTIQcDSGYGVVGPOSITcSGnR | N13(Deamidated); C18(Carbamidomethyl); C32(Carbamidomethyl); N35(Deamidated)                | 4.60 |
| 88  | 344179112 | scavenger receptor cysteine-rich type 1 protein M130 | EDAAVncTDISVQK                       | N6(Deamidated); C7(Carbamidomethyl)                                                         | 3.51 |
| 89  | 21450863  | attractin                                            | VFHIHnESWVLLTPK                      | N6(Deamidated)                                                                              | 4.25 |
| 90  | 156523970 | alpha-2-HS-glycoprotein                              | KVcQDcPLLAPLnDTR                     | C3(Carbamidomethyl); C6(Carbamidomethyl); N13(Deamidated)                                   | 4.69 |
| 91  | 73858566  | heparin cofactor 2                                   | DFVnASSKYEITIHNLFR                   | N4(Deamidated)                                                                              | 4.77 |
| 92  | 156523970 | alpha-2-HS-glycoprotein                              | VcQDcPLLAPLnDTR                      | C2(Carbamidomethyl); C5(Carbamidomethyl); N12(Deamidated)                                   | 4.73 |
| 93  | 62530391  | selenoprotein P                                      | VSEHIPVYQEEEnQTDVWTLLnGSK            | N13(Deamidated); N22(Deamidated)                                                            | 5.34 |
| 94  | 663071008 | Complement C1r subcomponent-like protein             | GFLALYQTVAVnYSQPISEASR               | N12(Deamidated)                                                                             | 3.49 |
| 95  | 62912462  | C4b-binding protein beta chain                       | TLFcnASK                             | C4(Carbamidomethyl); N5(Deamidated)                                                         | 1.99 |
| 96  | 355594753 | clusterin                                            | QLEEFLnQSSPFYFWmnGDR                 | N7(Deamidated); M16(Oxidation); N17(Deamidated)                                             | 3.06 |
| 97  | 4557485   | ceruloplasmin                                        | EnLTAPGSDSAVFFEQGTTR                 | N2(Deamidated)                                                                              | 4.86 |
| 98  | 70906437  | fibrinogen gamma chain                               | VDKDLQSLLEDILHQVEnKTSEVK             | N17(Deamidated)                                                                             | 6.38 |
| 99  | 4557485   | ceruloplasmin                                        | EHEGAIYPDnTTDFOR                     | N10(Deamidated)                                                                             | 4.56 |
| 100 | 4505529   | alpha-1-acid glycoprotein 2                          | NEEYnK                               | N5(Deamidated)                                                                              | 1.88 |
| 101 | 4501987   | afamin                                               | DIENFnSTQK                           | N6(Deamidated)                                                                              | 2.64 |
| 102 | 530403927 | protein Z-dependent protease inhibitor               | ETFFnLSK                             | N5(Deamidated)                                                                              | 1.96 |
| 103 | 4507509   | metalloproteinase inhibitor 1                        | FVGTPEVnQTTLYQR                      | N8(Deamidated)                                                                              | 3.83 |
| 104 | 371873523 | apolipoprotein M                                     | TELFSSScPGGImLnETGQGYQR              | C8(Carbamidomethyl); M13(Oxidation); N15(Deamidated)                                        | 4.36 |
| 105 | 530403927 | protein Z-dependent protease inhibitor               | LPYQGnATmLVVLmEK                     | N6(Deamidated); M9(Oxidation); M14(Oxidation)                                               | 3.81 |
| 106 | 62912462  | C4b-binding protein beta chain                       | DcDPPGnPVHGYFEGnFTLGSTISYYcEDR       | C2(Carbamidomethyl); N7(Deamidated); N16(Deamidated); N17(Deamidated); C28(Carbamidomethyl) | 3.24 |
| 107 | 4503627   | coagulation factor XI                                | GINYnSSVAK                           | N5(Deamidated)                                                                              | 2.40 |
| 108 | 105990532 | apolipoprotein B-100                                 | YDFnSSmLYSTAK                        | N4(Deamidated); M7(Oxidation)                                                               | 2.46 |
| 109 | 4505529   | alpha-1-acid glycoprotein 2                          | QnQcFYnSSYLVNQR                      | N2(Deamidated); C4(Carbamidomethyl); N7(Deamidated)                                         | 4.91 |
| 110 | 530377669 | plasma kallikrein                                    | IYPGVDFGGEELnVTFVK                   | N13(Deamidated)                                                                             | 3.69 |
| 111 | 21071030  | alpha-1B-glycoprotein                                | EGDHEFLEVPEAQEDVEATFPVHQPnYSsSYR     | N27(Deamidated); C30(Carbamidomethyl)                                                       | 6.29 |
| 112 | 4557759   | myeloperoxidase                                      | ALLPFDNLHDDPcLLTnR                   | C13(Carbamidomethyl); N17(Deamidated)                                                       | 4.58 |
| 113 | 530417477 | IgGFc-binding protein                                | VVTVAALGTnIStHKDEIGK                 | N10(Deamidated)                                                                             | 5.96 |
| 114 | 530371379 | RNA-binding protein 44                               | LVMENRnLSSnSAK                       | N7(Deamidated); N11(Deamidated)                                                             | 2.14 |
| 115 | 29788996  | serum paraoxonase/lactonase 3                        | VSTVYANnGSVLQGTsvASVYHGK             | N8(Deamidated)                                                                              | 3.77 |
| 116 | 21450863  | attractin                                            | DLDMFnASK                            | M4(Oxidation); N7(Deamidated)                                                               | 2.43 |
| 117 | 358438179 | neural cell adhesion molecule L1-like protein        | DGEAFEInGTEDGR                       | N8(Deamidated)                                                                              | 2.86 |
| 118 | 105990532 | apolipoprotein B-100                                 | QVLFLDTVYGncSTHFTVK                  | N11(Deamidated); C12(Carbamidomethyl)                                                       | 5.42 |



12 Supplemental Digital Content 2.xlsx

|   |   |        |        |      |        |        |        |        |        |        |        |        |        |        |        |       |  |
|---|---|--------|--------|------|--------|--------|--------|--------|--------|--------|--------|--------|--------|--------|--------|-------|--|
| 0 | 2 | 473.2  | 945.4  | 15.0 | 1.433  | 7.108  | 2.739  | 2.244  | 2.999  | 2.380  | 4.705  | 3.922  | 3.823  | 2.636  | 3.399  | 0.509 |  |
| 0 | 2 | 1090.0 | 2179.0 | 78.9 | 21.502 | 14.215 | 8.218  | 25.807 | 14.996 | 19.043 | 26.663 | 19.612 | 17.840 | 17.132 | 18.503 | 1.730 |  |
| 0 | 2 | 1153.0 | 2305.0 | 64.5 | 2.867  | 0.071  | 1.370  | 1.122  | 0.015  | 0.012  | 1.568  | 1.307  | 1.274  | 1.318  | 1.092  | 0.278 |  |
| 0 | 2 | 593.8  | 1186.6 | 55.1 | 0.014  | 0.071  | 0.014  | 0.011  | 0.015  | 2.380  | 0.016  | 0.013  | 1.274  | 1.318  | 0.513  | 0.267 |  |
| 0 | 3 | 991.8  | 2973.3 | 57.0 | 1.433  | 0.071  | 0.014  | 1.122  | 1.500  | 1.190  | 1.568  | 1.307  | 1.274  | 1.318  | 1.080  | 0.178 |  |
| 0 | 3 | 772.0  | 2314.1 | 43.0 | 2.867  | 0.071  | 2.739  | 1.122  | 2.999  | 2.380  | 1.568  | 1.307  | 2.549  | 2.636  | 2.024  | 0.304 |  |
| 0 | 2 | 565.8  | 1130.6 | 36.4 | 0.014  | 0.071  | 0.014  | 0.011  | 0.015  | 1.190  | 0.016  | 0.013  | 1.274  | 1.318  | 0.394  | 0.190 |  |
| 0 | 2 | 717.8  | 1434.7 | 20.1 | 1.433  | 0.071  | 1.370  | 1.122  | 1.500  | 1.190  | 1.568  | 0.013  | 0.013  | 1.318  | 0.960  | 0.207 |  |
| 1 | 4 | 994.2  | 3973.8 | 54.7 | 0.014  | 0.071  | 0.014  | 0.011  | 0.015  | 1.190  | 0.016  | 0.013  | 0.013  | 1.318  | 0.267  | 0.165 |  |
| 0 | 2 | 775.9  | 1550.7 | 31.0 | 1.433  | 0.071  | 0.014  | 0.011  | 1.500  | 1.190  | 0.016  | 0.013  | 1.274  | 1.318  | 0.684  | 0.221 |  |
| 0 | 3 | 607.7  | 1821.0 | 50.6 | 2.867  | 0.071  | 1.370  | 0.011  | 0.015  | 0.012  | 0.016  | 0.013  | 0.013  | 0.013  | 0.440  | 0.301 |  |
| 1 | 3 | 634.3  | 1900.9 | 45.2 | 1.433  | 0.071  | 0.014  | 1.122  | 0.015  | 1.190  | 1.568  | 1.307  | 1.274  | 1.318  | 0.931  | 0.200 |  |
| 1 | 3 | 752.7  | 2256.1 | 61.5 | 1.433  | 0.071  | 0.014  | 2.244  | 0.015  | 0.012  | 0.016  | 2.615  | 0.013  | 0.013  | 0.645  | 0.330 |  |
| 0 | 3 | 591.6  | 1772.8 | 51.8 | 10.034 | 7.108  | 6.848  | 5.610  | 7.498  | 3.570  | 6.274  | 6.537  | 5.097  | 6.589  | 6.517  | 0.531 |  |
| 0 | 3 | 972.8  | 2916.4 | 59.7 | 1.433  | 0.071  | 0.014  | 0.011  | 0.015  | 0.012  | 1.568  | 0.013  | 0.013  | 0.013  | 0.316  | 0.198 |  |
| 0 | 3 | 805.7  | 2415.2 | 70.1 | 0.014  | 0.071  | 0.014  | 0.011  | 0.015  | 0.012  | 0.016  | 1.307  | 0.013  | 1.318  | 0.279  | 0.172 |  |
| 0 | 2 | 471.2  | 941.4  | 25.8 | 1.433  | 0.071  | 0.014  | 1.122  | 1.500  | 1.190  | 0.016  | 1.307  | 2.549  | 0.013  | 0.921  | 0.273 |  |
| 0 | 3 | 842.7  | 2526.1 | 77.0 | 4.300  | 0.071  | 0.014  | 0.011  | 0.015  | 0.012  | 0.016  | 0.013  | 0.013  | 0.013  | 0.448  | 0.428 |  |
| 0 | 3 | 710.0  | 2128.0 | 53.5 | 10.034 | 14.215 | 6.848  | 11.220 | 10.497 | 7.141  | 7.842  | 7.845  | 12.743 | 6.589  | 9.498  | 0.840 |  |
| 2 | 5 | 534.5  | 2668.4 | 63.8 | 1.433  | 0.071  | 0.014  | 0.011  | 0.015  | 2.380  | 0.016  | 2.615  | 1.274  | 0.013  | 0.784  | 0.334 |  |
| 0 | 2 | 947.4  | 1893.8 | 35.1 | 14.335 | 49.754 | 16.436 | 15.709 | 14.996 | 13.092 | 17.252 | 13.075 | 26.760 | 13.178 | 19.459 | 3.600 |  |
| 0 | 2 | 399.2  | 797.3  | 14.3 | 1.433  | 14.215 | 1.370  | 1.122  | 1.500  | 1.190  | 1.568  | 0.013  | 3.823  | 1.318  | 2.755  | 1.307 |  |
| 0 | 2 | 598.8  | 1196.5 | 29.4 | 2.867  | 0.071  | 4.109  | 3.366  | 4.499  | 2.380  | 4.705  | 3.922  | 3.823  | 3.954  | 3.370  | 0.429 |  |
| 0 | 2 | 493.7  | 986.5  | 46.2 | 1.433  | 0.071  | 0.014  | 1.122  | 1.500  | 0.012  | 0.016  | 0.013  | 1.274  | 0.013  | 0.547  | 0.216 |  |
| 0 | 2 | 877.4  | 1753.9 | 43.7 | 1.433  | 0.071  | 1.370  | 0.011  | 1.500  | 1.190  | 0.016  | 1.307  | 1.274  | 1.318  | 0.949  | 0.202 |  |
| 0 | 3 | 850.4  | 2549.1 | 52.2 | 2.867  | 0.071  | 1.370  | 2.244  | 2.999  | 2.380  | 3.137  | 2.615  | 2.549  | 1.318  | 2.155  | 0.303 |  |
| 0 | 3 | 614.0  | 1839.9 | 51.9 | 2.867  | 0.071  | 1.370  | 2.244  | 1.500  | 1.190  | 3.137  | 3.922  | 2.549  | 1.318  | 2.017  | 0.359 |  |
| 0 | 3 | 1195.5 | 3584.5 | 65.2 | 0.014  | 0.071  | 0.014  | 1.122  | 0.015  | 1.190  | 0.016  | 1.307  | 3.823  | 0.013  | 0.759  | 0.384 |  |
| 0 | 2 | 527.3  | 1053.5 | 23.0 | 0.014  | 0.071  | 1.370  | 1.122  | 1.500  | 2.380  | 1.568  | 1.307  | 1.274  | 1.318  | 1.193  | 0.220 |  |
| 0 | 2 | 772.3  | 1543.7 | 44.4 | 1.433  | 0.071  | 1.370  | 1.122  | 1.500  | 2.380  | 0.016  | 1.307  | 2.549  | 3.954  | 1.570  | 0.370 |  |
| 0 | 2 | 961.9  | 1922.8 | 47.4 | 14.335 | 21.323 | 24.654 | 15.709 | 17.995 | 19.043 | 21.957 | 13.075 | 19.114 | 19.768 | 18.697 | 1.128 |  |
| 0 | 2 | 993.0  | 1985.0 | 66.6 | 4.300  | 0.071  | 2.739  | 3.366  | 1.500  | 3.570  | 3.137  | 3.922  | 2.549  | 1.318  | 2.647  | 0.418 |  |
| 0 | 4 | 960.2  | 3837.7 | 57.5 | 0.014  | 0.071  | 1.370  | 0.011  | 1.500  | 1.190  | 3.137  | 0.013  | 0.013  | 0.013  | 0.733  | 0.334 |  |
| 0 | 3 | 709.0  | 2125.0 | 60.2 | 1.433  | 0.071  | 1.370  | 0.011  | 0.015  | 1.190  | 0.016  | 0.013  | 0.013  | 0.013  | 0.415  | 0.201 |  |
| 1 | 4 | 517.3  | 2066.2 | 43.8 | 4.300  | 0.071  | 1.370  | 2.244  | 1.500  | 4.761  | 3.137  | 3.922  | 8.920  | 6.589  | 3.681  | 0.837 |  |
| 1 | 2 | 782.9  | 1564.8 | 36.8 | 0.014  | 0.071  | 0.014  | 0.011  | 0.015  | 5.951  | 0.016  | 2.615  | 0.013  | 2.636  | 1.136  | 0.635 |  |
| 0 | 3 | 813.7  | 2439.2 | 43.7 | 2.867  | 0.071  | 0.014  | 2.244  | 2.999  | 0.012  | 3.137  | 0.013  | 0.013  | 2.636  | 1.401  | 0.465 |  |
| 0 | 2 | 585.8  | 1170.5 | 48.6 | 2.867  | 0.071  | 0.014  | 1.122  | 1.500  | 1.190  | 0.016  | 0.013  | 1.274  | 1.318  | 0.938  | 0.293 |  |
| 0 | 2 | 755.8  | 1510.6 | 39.2 | 0.014  | 0.071  | 0.014  | 0.011  | 1.500  | 0.012  | 0.016  | 0.013  | 1.274  | 1.318  | 0.424  | 0.206 |  |
| 0 | 3 | 744.0  | 2230.1 | 57.2 | 2.867  | 0.071  | 4.109  | 3.366  | 4.499  | 3.570  | 3.137  | 2.615  | 2.549  | 1.318  | 2.810  | 0.413 |  |

12 Supplemental Digital Content 2.xlsx

|        |        |        |        |        |        |        |        |        |        |        |       |       |  |
|--------|--------|--------|--------|--------|--------|--------|--------|--------|--------|--------|-------|-------|--|
| 2.000  | 1.886  | 0.015  | 2.332  | 2.425  | 2.632  | 4.157  | 3.003  | 2.790  | 2.762  | 2.400  | 0.332 | 0.118 |  |
| 36.000 | 16.976 | 9.191  | 24.482 | 25.468 | 23.685 | 26.327 | 25.524 | 20.925 | 22.097 | 23.067 | 2.179 | 0.118 |  |
| 1.000  | 3.772  | 4.595  | 1.166  | 3.638  | 1.316  | 1.386  | 0.015  | 1.395  | 1.381  | 1.966  | 0.469 | 0.126 |  |
| 0.010  | 1.886  | 1.532  | 1.166  | 1.213  | 0.013  | 1.386  | 0.015  | 1.395  | 2.762  | 1.138  | 0.285 | 0.126 |  |
| 1.000  | 0.019  | 0.015  | 0.012  | 1.213  | 1.316  | 1.386  | 0.015  | 1.395  | 0.014  | 0.638  | 0.211 | 0.127 |  |
| 3.000  | 1.886  | 4.595  | 1.166  | 3.638  | 1.316  | 4.157  | 1.501  | 4.185  | 2.762  | 2.821  | 0.410 | 0.136 |  |
| 0.010  | 1.886  | 1.532  | 1.166  | 0.012  | 1.316  | 1.386  | 0.015  | 0.014  | 1.381  | 0.872  | 0.241 | 0.136 |  |
| 1.000  | 0.019  | 1.532  | 0.012  | 1.213  | 1.316  | 0.014  | 0.015  | 0.014  | 0.014  | 0.515  | 0.208 | 0.147 |  |
| 1.000  | 0.019  | 0.015  | 2.332  | 1.213  | 0.013  | 1.386  | 0.015  | 0.014  | 1.381  | 0.739  | 0.264 | 0.147 |  |
| 0.010  | 1.886  | 0.015  | 1.166  | 1.213  | 1.316  | 1.386  | 1.501  | 1.395  | 1.381  | 1.127  | 0.196 | 0.151 |  |
| 1.000  | 1.886  | 3.064  | 0.012  | 0.012  | 1.316  | 1.386  | 0.015  | 2.790  | 0.014  | 1.149  | 0.368 | 0.153 |  |
| 1.000  | 0.019  | 0.015  | 0.012  | 1.213  | 0.013  | 1.386  | 0.015  | 0.014  | 1.381  | 0.507  | 0.204 | 0.154 |  |
| 0.010  | 0.019  | 0.015  | 1.166  | 0.012  | 0.013  | 0.014  | 0.015  | 0.014  | 0.014  | 0.129  | 0.115 | 0.157 |  |
| 5.000  | 7.545  | 1.532  | 6.995  | 6.064  | 3.948  | 6.928  | 6.006  | 4.185  | 5.524  | 5.373  | 0.568 | 0.158 |  |
| 3.000  | 0.019  | 1.532  | 0.012  | 2.425  | 0.013  | 0.014  | 0.015  | 2.790  | 0.014  | 0.983  | 0.413 | 0.162 |  |
| 0.010  | 0.019  | 0.015  | 0.012  | 1.213  | 0.013  | 1.386  | 1.501  | 1.395  | 1.381  | 0.694  | 0.228 | 0.163 |  |
| 0.010  | 1.886  | 1.532  | 1.166  | 1.213  | 2.632  | 1.386  | 1.501  | 1.395  | 1.381  | 1.410  | 0.206 | 0.170 |  |
| 4.000  | 0.019  | 0.015  | 0.012  | 3.638  | 3.948  | 1.386  | 0.015  | 1.395  | 0.014  | 1.444  | 0.556 | 0.173 |  |
| 3.000  | 7.545  | 9.191  | 5.829  | 8.489  | 5.263  | 6.928  | 9.009  | 8.370  | 13.811 | 7.743  | 0.910 | 0.174 |  |
| 0.010  | 0.019  | 0.015  | 1.166  | 0.012  | 1.316  | 0.014  | 0.015  | 0.014  | 0.014  | 0.259  | 0.164 | 0.175 |  |
| 9.000  | 11.317 | 18.381 | 13.990 | 14.553 | 17.106 | 16.628 | 13.513 | 12.555 | 16.573 | 14.362 | 0.918 | 0.187 |  |
| 0.010  | 3.772  | 0.015  | 1.166  | 1.213  | 0.013  | 0.014  | 0.015  | 1.395  | 1.381  | 0.899  | 0.377 | 0.189 |  |
| 7.000  | 3.772  | 4.595  | 2.332  | 4.851  | 2.632  | 5.543  | 3.003  | 4.185  | 4.143  | 4.206  | 0.445 | 0.193 |  |
| 1.000  | 1.886  | 0.015  | 1.166  | 1.213  | 0.013  | 1.386  | 1.501  | 1.395  | 0.014  | 0.959  | 0.219 | 0.197 |  |
| 0.010  | 1.886  | 1.532  | 1.166  | 1.213  | 1.316  | 1.386  | 1.501  | 1.395  | 1.381  | 1.279  | 0.154 | 0.211 |  |
| 2.000  | 0.019  | 0.015  | 1.166  | 1.213  | 1.316  | 2.771  | 3.003  | 1.395  | 2.762  | 1.566  | 0.338 | 0.211 |  |
| 2.000  | 1.886  | 3.064  | 2.332  | 1.213  | 2.632  | 2.771  | 4.504  | 2.790  | 2.762  | 2.595  | 0.275 | 0.217 |  |
| 1.000  | 0.019  | 0.015  | 0.012  | 1.213  | 0.013  | 0.014  | 0.015  | 0.014  | 0.014  | 0.233  | 0.146 | 0.217 |  |
| 2.000  | 1.886  | 1.532  | 1.166  | 2.425  | 0.013  | 1.386  | 1.501  | 2.790  | 1.381  | 1.608  | 0.239 | 0.218 |  |
| 3.000  | 5.659  | 1.532  | 3.497  | 2.425  | 1.316  | 1.386  | 1.501  | 1.395  | 1.381  | 2.309  | 0.446 | 0.218 |  |
| 16.000 | 24.520 | 16.849 | 19.819 | 18.191 | 3.948  | 13.856 | 27.026 | 6.975  | 5.524  | 15.271 | 2.472 | 0.223 |  |
| 4.000  | 5.659  | 4.595  | 3.497  | 3.638  | 2.632  | 4.157  | 1.501  | 2.790  | 1.381  | 3.385  | 0.424 | 0.231 |  |
| 2.000  | 0.019  | 0.015  | 2.332  | 2.425  | 1.316  | 2.771  | 0.015  | 2.790  | 0.014  | 1.370  | 0.391 | 0.231 |  |
| 0.010  | 0.019  | 0.015  | 1.166  | 0.012  | 0.013  | 0.014  | 0.015  | 0.014  | 0.014  | 0.129  | 0.115 | 0.234 |  |
| 1.000  | 3.772  | 0.015  | 3.497  | 3.638  | 3.948  | 4.157  | 0.015  | 0.014  | 4.143  | 2.420  | 0.598 | 0.236 |  |
| 0.010  | 0.019  | 0.015  | 0.012  | 0.012  | 0.013  | 0.014  | 0.015  | 0.014  | 2.762  | 0.289  | 0.275 | 0.237 |  |
| 0.010  | 0.019  | 1.532  | 0.012  | 3.638  | 0.013  | 1.386  | 0.015  | 0.014  | 0.014  | 0.665  | 0.381 | 0.237 |  |
| 1.000  | 1.886  | 1.532  | 1.166  | 2.425  | 0.013  | 1.386  | 1.501  | 1.395  | 1.381  | 1.369  | 0.196 | 0.237 |  |
| 0.010  | 0.019  | 0.015  | 0.012  | 1.213  | 0.013  | 0.014  | 0.015  | 0.014  | 0.014  | 0.134  | 0.120 | 0.239 |  |
| 7.000  | 3.772  | 0.015  | 3.497  | 3.638  | 2.632  | 2.771  | 3.003  | 4.185  | 6.905  | 3.742  | 0.645 | 0.240 |  |

## 12 Supplemental Digital Content 2.xlsx

|     |           |                                                                |                                 |                                                                                   |      |
|-----|-----------|----------------------------------------------------------------|---------------------------------|-----------------------------------------------------------------------------------|------|
| 119 | 530373049 | biotinidase                                                    | NPVGLIGAEnATGETDPSHSK           | N10(Deamidated)                                                                   | 5.75 |
| 120 | 45269141  | multimerin-1                                                   | LQnLTLPtNASIK                   | N3(Deamidated); N9(Deamidated)                                                    | 2.94 |
| 121 | 4504489   | histidine-rich glycoprotein                                    | VIDFncTTSSVSSALANTK             | N5(Deamidated); C6(Carbamidomethyl)                                               | 4.84 |
| 122 | 62243068  | insulin-like growth factor-binding protein 3                   | AYLLPAPPAPGnASESEEDR            | N12(Deamidated)                                                                   | 2.75 |
| 123 | 19923106  | serum paraoxonase/arylesterase 1                               | HAnWTLTPLK                      | N3(Deamidated)                                                                    | 3.82 |
| 124 | 554506550 | cholesteryl ester transfer protein                             | SIDVSIQnVSVVFK                  | N8(Deamidated)                                                                    | 3.75 |
| 125 | 261878614 | inter-alpha-trypsin inhibitor heavy chain H1                   | IcDLLVANNHFAHFAPQnLTNmNK        | C2(Carbamidomethyl); N19(Deamidated); M23(Oxidation)                              | 6.12 |
| 126 | 4502165   | apolipoprotein F                                               | QGGVnATQVLIQHLR                 | N5(Deamidated)                                                                    | 3.85 |
| 127 | 14550407  | complement C2                                                  | LTDTIcGVGnmSAnASDQER            | C6(Carbamidomethyl); N10(Deamidated); M11(Oxidation); N14(Deamidated)             | 3.71 |
| 128 | 178557739 | complement C4-B                                                | FSDGLESnSSTQFEVK                | N8(Deamidated)                                                                    | 4.32 |
| 129 | 62739186  | complement factor H                                            | mDGASnVtCINSR                   | M1(Oxidation); N6(Deamidated); C9(Carbamidomethyl)                                | 3.95 |
| 130 | 88702793  | vasorin                                                        | LHEITnETFR                      | N6(Deamidated)                                                                    | 3.11 |
| 131 | 89191868  | von Willebrand factor                                          | GLQPTLTNPGEcRPhFTcAcR           | C12(Carbamidomethyl); N15(Deamidated); C18(Carbamidomethyl); C20(Carbamidomethyl) | 3.24 |
| 132 | 4502261   | antithrombin-III                                               | LGAcnDTLQQLmEVFKFDTISEK         | C4(Carbamidomethyl); N5(Deamidated); M12(Oxidation)                               | 4.36 |
| 133 | 166795301 | prenylcysteine oxidase 1                                       | LLHALGGDDFLGmLnR                | M13(Oxidation); N15(Deamidated)                                                   | 3.22 |
| 134 | 156616294 | N-acetylmuramoyl-L-alanine amidase                             | GFGVAIVGnYTAALPTEAALR           | N9(Deamidated)                                                                    | 5.30 |
| 135 | 62912462  | C4b-binding protein beta chain                                 | LGHcPDPVLVnGEFSSSGPVnVSDK       | C4(Carbamidomethyl); N11(Deamidated); N21(Deamidated)                             | 6.16 |
| 136 | 530394351 | multimerin-2                                                   | FnTTYInIGSSYFPEHGyFR            | N2(Deamidated); N7(Deamidated)                                                    | 4.27 |
| 137 | 530397208 | plasma protease C1 inhibitor                                   | VLSnNSDANLELINTWVAK             | N4(Deamidated)                                                                    | 4.57 |
| 138 | 167857790 | alpha-1-acid glycoprotein 1                                    | QDQcIYnTTYLNVQR                 | C4(Carbamidomethyl); N7(Deamidated)                                               | 4.92 |
| 139 | 105990532 | apolipoprotein B-100                                           | FnSSYLQGTNQTGR                  | N2(Deamidated)                                                                    | 3.93 |
| 140 | 31377806  | polymeric immunoglobulin receptor                              | OIGLYPVLVIDSSGYVNPnYTGR         | N19(Deamidated)                                                                   | 5.08 |
| 141 | 4504893   | kininogen-1                                                    | HGIQYFnNtQHSSLFmLNEVK           | N8(Deamidated); M17(Oxidation)                                                    | 5.93 |
| 142 | 530375183 | serotransferrin                                                | cGLVPVLAENYnK                   | C1(Carbamidomethyl); N12(Deamidated)                                              | 3.20 |
| 143 | 4503627   | coagulation factor XI                                          | VYSGILnQSEIK                    | N7(Deamidated)                                                                    | 3.46 |
| 144 | 62243068  | insulin-like growth factor-binding protein 3                   | GLcVnASAVSR                     | C3(Carbamidomethyl); N5(Deamidated)                                               | 2.69 |
| 145 | 226371613 | sex hormone-binding globulin                                   | LDVDQALnR                       | N8(Deamidated)                                                                    | 2.77 |
| 146 | 262050538 | inter-alpha-trypsin inhibitor heavy chain H4                   | LPTQnITFQTESSVAEQEAEFQSPK       | N5(Deamidated)                                                                    | 6.26 |
| 147 | 29171717  | phosphatidylinositol-glycan-specific phospholipase D           | LGTSLSGGHVLmGTLK                | M12(Oxidation); N13(Deamidated)                                                   | 4.82 |
| 148 | 62739186  | complement factor H                                            | ISEEnETTcYmGK                   | N5(Deamidated); C9(Carbamidomethyl); M11(Oxidation)                               | 3.02 |
| 149 | 4826772   | insulin-like growth factor-binding protein complex acid labile | AGAFLGLTNVAVmnlSGNcLR           | M13(Oxidation); N14(Deamidated); C19(Carbamidomethyl)                             | 4.34 |
| 150 | 554506550 | cholesteryl ester transfer protein                             | GVVVnSSVmVK                     | N5(Deamidated); M9(Oxidation)                                                     | 2.21 |
| 151 | 530417477 | IgGfc-binding protein                                          | VVTVAALGTnISIHK                 | N10(Deamidated)                                                                   | 4.18 |
| 152 | 530369184 | interleukin-1 receptor antagonist                              | LOLEAVnITDLSNR                  | N7(Deamidated)                                                                    | 3.88 |
| 153 | 73858566  | heparin cofactor 2                                             | GETHEQVHSILHFkDFVnASSK          | N18(Deamidated)                                                                   | 4.67 |
| 154 | 39777608  | semaphorin-4B                                                  | FEAEHISnYTALLSR                 | N8(Deamidated)                                                                    | 3.62 |
| 155 | 4505047   | lumican                                                        | LGSFEGLVnLTFIHLQHNR             | N9(Deamidated)                                                                    | 5.75 |
| 156 | 167857790 | alpha-1-acid glycoprotein 1                                    | QDQcIYnTTYLnVQRENGTISR          | C4(Carbamidomethyl); N7(Deamidated); N12(Deamidated)                              | 3.28 |
| 157 | 4502337   | zinc-alpha-2-glycoprotein                                      | DIVEYYnDSNGSHVLOGR              | N7(Deamidated)                                                                    | 5.40 |
| 158 | 105990532 | apolipoprotein B-100                                           | QVFPGLNYcTSGAYSnASSTDSASYPLTGDR | C9(Carbamidomethyl); N16(Deamidated)                                              | 5.14 |
| 159 | 5453914   | phospholipid transfer protein                                  | EGHFYYnISEVK                    | N7(Deamidated)                                                                    | 4.02 |

12 Supplemental Digital Content 2.xlsx

|   |   |        |        |      |        |        |        |        |        |        |        |        |        |        |        |       |  |
|---|---|--------|--------|------|--------|--------|--------|--------|--------|--------|--------|--------|--------|--------|--------|-------|--|
| 0 | 3 | 699.0  | 2095.0 | 35.4 | 2.867  | 0.071  | 1.370  | 2.244  | 2.999  | 1.190  | 1.568  | 3.922  | 3.823  | 3.954  | 2.401  | 0.422 |  |
| 0 | 2 | 707.9  | 1414.8 | 47.4 | 1.433  | 0.071  | 0.014  | 1.122  | 1.500  | 1.190  | 0.016  | 1.307  | 1.274  | 1.318  | 0.925  | 0.197 |  |
| 0 | 2 | 1008.5 | 2016.0 | 53.4 | 5.734  | 14.215 | 2.739  | 8.976  | 7.498  | 7.141  | 7.842  | 6.537  | 8.920  | 6.589  | 7.619  | 0.925 |  |
| 0 | 2 | 1043.0 | 2085.0 | 48.0 | 0.014  | 0.071  | 0.014  | 0.011  | 0.015  | 0.012  | 0.016  | 0.013  | 0.013  | 1.318  | 0.150  | 0.130 |  |
| 0 | 2 | 591.3  | 1181.6 | 38.8 | 4.300  | 0.071  | 4.109  | 2.244  | 1.500  | 0.012  | 1.568  | 1.307  | 1.274  | 2.636  | 1.902  | 0.462 |  |
| 0 | 2 | 768.4  | 1535.8 | 63.7 | 0.014  | 0.071  | 0.014  | 1.122  | 0.015  | 0.012  | 0.016  | 0.013  | 1.274  | 1.318  | 0.387  | 0.186 |  |
| 0 | 4 | 737.4  | 2946.4 | 59.2 | 10.034 | 0.071  | 4.109  | 6.732  | 5.998  | 3.570  | 3.137  | 6.537  | 3.823  | 3.954  | 4.797  | 0.846 |  |
| 0 | 3 | 545.6  | 1634.9 | 47.8 | 1.433  | 0.071  | 1.370  | 0.011  | 0.015  | 0.012  | 0.016  | 1.307  | 1.274  | 1.318  | 0.683  | 0.220 |  |
| 0 | 2 | 1079.0 | 2156.9 | 35.6 | 0.014  | 0.071  | 2.739  | 1.122  | 0.015  | 1.190  | 1.568  | 2.615  | 0.013  | 2.636  | 1.198  | 0.366 |  |
| 0 | 3 | 592.6  | 1775.8 | 43.2 | 12.901 | 7.108  | 13.697 | 37.028 | 22.494 | 22.613 | 12.547 | 19.612 | 17.840 | 22.403 | 18.824 | 2.607 |  |
| 0 | 2 | 721.3  | 1441.6 | 24.2 | 10.034 | 21.323 | 8.218  | 10.098 | 11.997 | 10.711 | 10.979 | 10.460 | 12.743 | 9.225  | 11.579 | 1.156 |  |
| 0 | 3 | 420.9  | 1260.6 | 28.8 | 1.433  | 0.071  | 1.370  | 2.244  | 1.500  | 2.380  | 1.568  | 1.307  | 1.274  | 1.318  | 1.447  | 0.197 |  |
| 0 | 3 | 817.4  | 2450.1 | 41.1 | 0.014  | 0.071  | 1.370  | 1.122  | 1.500  | 1.190  | 0.016  | 0.013  | 0.013  | 2.636  | 0.794  | 0.288 |  |
| 1 | 3 | 902.1  | 2704.3 | 71.3 | 0.014  | 0.071  | 0.014  | 1.122  | 1.500  | 1.190  | 0.016  | 1.307  | 0.013  | 1.318  | 0.656  | 0.213 |  |
| 0 | 3 | 587.0  | 1758.9 | 55.7 | 0.014  | 0.071  | 0.014  | 1.122  | 1.500  | 2.380  | 1.568  | 1.307  | 1.274  | 1.318  | 1.057  | 0.248 |  |
| 0 | 2 | 1046.6 | 2092.1 | 68.7 | 5.734  | 0.071  | 4.109  | 3.366  | 2.999  | 3.570  | 4.705  | 3.922  | 3.823  | 2.636  | 3.494  | 0.470 |  |
| 0 | 3 | 871.7  | 2613.2 | 47.9 | 2.867  | 0.071  | 2.739  | 4.488  | 2.999  | 2.380  | 3.137  | 5.230  | 3.823  | 5.271  | 3.301  | 0.485 |  |
| 0 | 3 | 805.7  | 2415.1 | 63.1 | 0.014  | 0.071  | 0.014  | 1.122  | 0.015  | 0.012  | 0.016  | 1.307  | 0.013  | 0.013  | 0.260  | 0.160 |  |
| 0 | 2 | 1051.5 | 2102.1 | 63.8 | 20.068 | 14.215 | 17.805 | 5.610  | 16.496 | 1.190  | 20.389 | 3.922  | 15.291 | 11.861 | 12.685 | 2.169 |  |
| 0 | 2 | 958.9  | 1916.9 | 47.4 | 21.502 | 71.077 | 39.720 | 21.319 | 16.496 | 23.803 | 23.526 | 23.534 | 25.485 | 30.310 | 29.677 | 5.004 |  |
| 0 | 2 | 843.9  | 1686.8 | 44.0 | 0.014  | 0.071  | 1.370  | 0.011  | 1.500  | 3.570  | 0.016  | 1.307  | 1.274  | 1.318  | 1.045  | 0.350 |  |
| 0 | 3 | 842.8  | 2526.3 | 72.3 | 1.433  | 0.071  | 0.014  | 0.011  | 0.015  | 3.570  | 0.016  | 0.013  | 2.549  | 0.013  | 0.771  | 0.413 |  |
| 0 | 3 | 880.1  | 2638.2 | 46.8 | 21.502 | 14.215 | 27.393 | 2.244  | 20.995 | 0.012  | 0.016  | 19.612 | 26.760 | 0.013  | 13.276 | 3.650 |  |
| 0 | 2 | 739.4  | 1477.7 | 49.6 | 4.300  | 7.108  | 4.109  | 3.366  | 5.998  | 3.570  | 3.137  | 2.615  | 5.097  | 3.954  | 4.325  | 0.437 |  |
| 0 | 2 | 676.4  | 1351.7 | 41.1 | 1.433  | 0.071  | 1.370  | 1.122  | 1.500  | 1.190  | 1.568  | 1.307  | 1.274  | 1.318  | 1.215  | 0.134 |  |
| 0 | 2 | 567.8  | 1134.6 | 30.5 | 1.433  | 0.071  | 1.370  | 1.122  | 1.500  | 1.190  | 1.568  | 1.307  | 1.274  | 1.318  | 1.215  | 0.134 |  |
| 0 | 2 | 522.8  | 1044.5 | 35.2 | 2.867  | 7.108  | 1.370  | 1.122  | 2.999  | 2.380  | 3.137  | 1.307  | 2.549  | 1.318  | 2.616  | 0.557 |  |
| 0 | 3 | 937.5  | 2810.3 | 57.4 | 10.034 | 21.323 | 12.327 | 8.976  | 4.499  | 11.902 | 10.979 | 15.690 | 8.920  | 9.225  | 11.387 | 1.431 |  |
| 0 | 3 | 578.0  | 1731.9 | 35.5 | 1.433  | 0.071  | 0.014  | 2.244  | 1.500  | 0.012  | 1.568  | 0.013  | 1.274  | 1.318  | 0.945  | 0.263 |  |
| 0 | 3 | 526.9  | 1578.6 | 23.3 | 1.433  | 7.108  | 2.739  | 4.488  | 1.500  | 2.380  | 1.568  | 3.922  | 2.549  | 1.318  | 2.901  | 0.578 |  |
| 0 | 3 | 732.4  | 2195.1 | 68.3 | 1.433  | 0.071  | 0.014  | 1.122  | 0.015  | 0.012  | 0.016  | 0.013  | 0.013  | 0.013  | 0.272  | 0.169 |  |
| 0 | 2 | 568.3  | 1135.6 | 27.7 | 1.433  | 0.071  | 0.014  | 0.011  | 1.500  | 0.012  | 0.016  | 0.013  | 1.274  | 2.636  | 0.698  | 0.298 |  |
| 0 | 2 | 762.4  | 1523.9 | 43.8 | 1.433  | 0.071  | 0.014  | 2.244  | 2.999  | 2.380  | 1.568  | 1.307  | 8.920  | 10.543 | 3.148  | 1.143 |  |
| 0 | 2 | 858.4  | 1715.9 | 57.2 | 0.014  | 0.071  | 0.014  | 0.011  | 1.500  | 0.012  | 0.016  | 0.013  | 0.013  | 0.013  | 0.168  | 0.148 |  |
| 1 | 5 | 503.1  | 2511.2 | 39.1 | 1.433  | 0.071  | 0.014  | 2.244  | 0.015  | 0.012  | 0.016  | 0.013  | 0.013  | 0.013  | 0.384  | 0.250 |  |
| 0 | 3 | 622.3  | 1864.9 | 60.8 | 0.014  | 0.071  | 0.014  | 0.011  | 0.015  | 1.190  | 0.016  | 1.307  | 0.013  | 0.013  | 0.266  | 0.164 |  |
| 0 | 3 | 732.7  | 2196.2 | 64.6 | 12.901 | 0.071  | 1.370  | 10.098 | 11.997 | 7.141  | 12.547 | 6.537  | 15.291 | 11.861 | 8.981  | 1.610 |  |
| 1 | 3 | 892.4  | 2675.2 | 46.4 | 0.014  | 0.071  | 0.014  | 2.244  | 0.015  | 0.012  | 1.568  | 0.013  | 1.274  | 0.013  | 0.524  | 0.266 |  |
| 0 | 3 | 689.7  | 2066.9 | 44.0 | 14.335 | 14.215 | 9.588  | 12.343 | 16.496 | 10.711 | 17.252 | 15.690 | 15.291 | 17.132 | 14.305 | 0.839 |  |
| 0 | 3 | 1184.5 | 3551.6 | 63.3 | 0.014  | 0.071  | 2.739  | 1.122  | 2.999  | 2.380  | 1.568  | 0.013  | 2.549  | 2.636  | 1.609  | 0.386 |  |
| 0 | 2 | 743.8  | 1486.7 | 39.7 | 2.867  | 7.108  | 4.109  | 2.244  | 1.500  | 3.570  | 1.568  | 1.307  | 5.097  | 2.636  | 3.201  | 0.580 |  |

## 12 Supplemental Digital Content 2.xlsx

|        |        |        |        |        |        |        |        |        |        |        |       |       |
|--------|--------|--------|--------|--------|--------|--------|--------|--------|--------|--------|-------|-------|
| 3.000  | 3.772  | 3.064  | 1.166  | 3.638  | 2.632  | 2.771  | 3.003  | 2.790  | 4.143  | 2.998  | 0.256 | 0.242 |
| 1.000  | 1.886  | 0.015  | 1.166  | 1.213  | 1.316  | 1.386  | 1.501  | 1.395  | 1.381  | 1.226  | 0.153 | 0.244 |
| 4.000  | 7.545  | 4.595  | 6.995  | 6.064  | 7.895  | 8.314  | 6.006  | 5.580  | 6.905  | 6.390  | 0.444 | 0.246 |
| 0.010  | 1.886  | 0.015  | 0.012  | 0.012  | 0.013  | 1.386  | 0.015  | 0.014  | 1.381  | 0.474  | 0.239 | 0.248 |
| 3.000  | 5.659  | 4.595  | 0.012  | 3.638  | 3.948  | 2.771  | 0.015  | 2.790  | 1.381  | 2.781  | 0.587 | 0.255 |
| 0.010  | 0.019  | 0.015  | 1.166  | 0.012  | 0.013  | 0.014  | 0.015  | 0.014  | 0.014  | 0.129  | 0.115 | 0.255 |
| 6.000  | 1.886  | 1.532  | 8.161  | 8.489  | 7.895  | 8.314  | 4.504  | 6.975  | 8.287  | 6.204  | 0.848 | 0.255 |
| 0.010  | 0.019  | 1.532  | 1.166  | 1.213  | 1.316  | 0.014  | 1.501  | 1.395  | 2.762  | 1.093  | 0.275 | 0.259 |
| 2.000  | 1.886  | 0.015  | 2.332  | 1.213  | 1.316  | 2.771  | 3.003  | 1.395  | 1.381  | 1.731  | 0.274 | 0.259 |
| 12.000 | 15.089 | 10.722 | 20.984 | 3.638  | 3.948  | 20.785 | 28.527 | 11.160 | 19.335 | 14.619 | 2.501 | 0.260 |
| 10.000 | 13.203 | 6.127  | 10.492 | 10.915 | 10.527 | 8.314  | 9.009  | 9.765  | 12.430 | 10.078 | 0.635 | 0.270 |
| 2.000  | 1.886  | 1.532  | 1.166  | 2.425  | 2.632  | 1.386  | 1.501  | 1.395  | 1.381  | 1.730  | 0.155 | 0.272 |
| 1.000  | 0.019  | 0.015  | 0.012  | 0.012  | 0.013  | 0.014  | 1.501  | 0.014  | 1.381  | 0.398  | 0.199 | 0.272 |
| 1.000  | 0.019  | 0.015  | 1.166  | 1.213  | 0.013  | 0.014  | 0.015  | 0.014  | 0.014  | 0.348  | 0.171 | 0.273 |
| 2.000  | 0.019  | 1.532  | 1.166  | 2.425  | 1.316  | 1.386  | 1.501  | 1.395  | 1.381  | 1.412  | 0.195 | 0.275 |
| 5.000  | 3.772  | 4.595  | 1.166  | 6.064  | 2.632  | 6.928  | 4.504  | 5.580  | 2.762  | 4.300  | 0.553 | 0.281 |
| 3.000  | 1.886  | 3.064  | 2.332  | 3.638  | 1.316  | 2.771  | 4.504  | 1.395  | 2.762  | 2.667  | 0.312 | 0.286 |
| 1.000  | 1.886  | 0.015  | 0.012  | 0.012  | 0.013  | 1.386  | 0.015  | 0.014  | 1.381  | 0.573  | 0.238 | 0.288 |
| 12.000 | 49.040 | 18.381 | 5.829  | 21.829 | 18.422 | 13.856 | 4.504  | 29.295 | 5.524  | 17.868 | 4.275 | 0.294 |
| 18.000 | 37.723 | 19.913 | 25.648 | 18.191 | 21.053 | 16.628 | 27.026 | 22.320 | 31.765 | 23.827 | 2.141 | 0.297 |
| 2.000  | 3.772  | 1.532  | 1.166  | 1.213  | 0.013  | 1.386  | 1.501  | 1.395  | 1.381  | 1.536  | 0.295 | 0.298 |
| 2.000  | 0.019  | 0.015  | 1.166  | 2.425  | 1.316  | 1.386  | 0.015  | 1.395  | 4.143  | 1.388  | 0.405 | 0.300 |
| 15.000 | 15.089 | 0.015  | 0.012  | 0.012  | 13.158 | 18.013 | 0.015  | 22.320 | 0.014  | 8.365  | 2.884 | 0.305 |
| 5.000  | 1.886  | 6.127  | 3.497  | 3.638  | 2.632  | 4.157  | 4.504  | 2.790  | 2.762  | 3.699  | 0.403 | 0.306 |
| 1.000  | 1.886  | 1.532  | 1.166  | 1.213  | 1.316  | 1.386  | 1.501  | 1.395  | 1.381  | 1.378  | 0.076 | 0.306 |
| 1.000  | 1.886  | 1.532  | 1.166  | 1.213  | 1.316  | 1.386  | 1.501  | 1.395  | 1.381  | 1.378  | 0.076 | 0.306 |
| 1.000  | 3.772  | 1.532  | 1.166  | 2.425  | 1.316  | 2.771  | 1.501  | 1.395  | 2.762  | 1.964  | 0.288 | 0.313 |
| 9.000  | 9.431  | 10.722 | 15.155 | 9.702  | 7.895  | 9.699  | 3.003  | 6.975  | 13.811 | 9.539  | 1.073 | 0.315 |
| 3.000  | 0.019  | 1.532  | 0.012  | 2.425  | 1.316  | 2.771  | 1.501  | 1.395  | 0.014  | 1.399  | 0.354 | 0.317 |
| 5.000  | 3.772  | 1.532  | 5.829  | 4.851  | 2.632  | 2.771  | 3.003  | 2.790  | 4.143  | 3.632  | 0.418 | 0.319 |
| 2.000  | 0.019  | 0.015  | 0.012  | 3.638  | 0.013  | 1.386  | 0.015  | 0.014  | 0.014  | 0.713  | 0.396 | 0.320 |
| 1.000  | 0.019  | 1.532  | 1.166  | 1.213  | 1.316  | 1.386  | 1.501  | 1.395  | 0.014  | 1.054  | 0.180 | 0.320 |
| 2.000  | 3.772  | 0.015  | 3.497  | 1.213  | 5.263  | 1.386  | 0.015  | 0.014  | 1.381  | 1.856  | 0.568 | 0.325 |
| 0.010  | 0.019  | 0.015  | 0.012  | 0.012  | 1.316  | 0.014  | 1.501  | 0.014  | 1.381  | 0.429  | 0.212 | 0.325 |
| 1.000  | 0.019  | 0.015  | 0.012  | 0.012  | 0.013  | 0.014  | 0.015  | 0.014  | 0.014  | 0.113  | 0.099 | 0.325 |
| 0.010  | 0.019  | 0.015  | 0.012  | 1.213  | 1.316  | 0.014  | 0.015  | 1.395  | 1.381  | 0.539  | 0.215 | 0.327 |
| 4.000  | 5.659  | 3.064  | 8.161  | 7.276  | 9.211  | 11.085 | 4.504  | 5.580  | 12.430 | 7.097  | 0.983 | 0.331 |
| 0.010  | 1.886  | 0.015  | 0.012  | 0.012  | 0.013  | 0.014  | 0.015  | 0.014  | 0.014  | 0.201  | 0.187 | 0.334 |
| 10.000 | 24.520 | 21.445 | 11.658 | 9.702  | 17.106 | 20.785 | 15.014 | 15.345 | 15.192 | 16.077 | 1.574 | 0.334 |
| 4.000  | 5.659  | 0.015  | 2.332  | 2.425  | 1.316  | 1.386  | 0.015  | 2.790  | 2.762  | 2.270  | 0.546 | 0.337 |
| 0.010  | 3.772  | 3.064  | 2.332  | 2.425  | 2.632  | 2.771  | 3.003  | 2.790  | 2.762  | 2.556  | 0.310 | 0.340 |

## 12 Supplemental Digital Content 2.xlsx

|     |           |                                                      |                                   |                                                                             |      |
|-----|-----------|------------------------------------------------------|-----------------------------------|-----------------------------------------------------------------------------|------|
| 160 | 16418467  | leucine-rich alpha-2-glycoprotein                    | mFSQnDTR                          | M1(Oxidation); N5(Deamidated)                                               | 2.61 |
| 161 | 355594753 | clusterin                                            | EDALnETR                          | N5(Deamidated)                                                              | 2.72 |
| 162 | 262231791 | complement factor H-related protein 3                | FVQGnSTEVAcHPGYGLPK               | N5(Deamidated); C11(Carbamidomethyl)                                        | 2.94 |
| 163 | 11386147  | prosaposin                                           | TnSTFVQALVEHVK                    | N2(Deamidated)                                                              | 3.71 |
| 164 | 21450863  | attractin                                            | YLHTAVIVSGTmLVFGGNThnDTSmSHGAK    | M12(Oxidation); N21(Deamidated); M25(Oxidation)                             | 3.90 |
| 165 | 530403990 | kallistatin                                          | FLnDTmAVYEAK                      | N3(Deamidated); M6(Oxidation)                                               | 2.81 |
| 166 | 105990535 | coagulation factor V                                 | VSAITLVSATSTTAnmTVGPEGK           | N15(Deamidated); M16(Oxidation)                                             | 4.35 |
| 167 | 530403048 | alpha-1-antichymotrypsin                             | TLnQSSDELQLSmGNAmFVK              | N3(Deamidated); M13(Oxidation); M17(Oxidation)                              | 4.66 |
| 168 | 530396179 | interleukin-18-binding protein                       | ALVLEQLTPALHSTnFScVLVDPEQVVQR     | N15(Deamidated); C18(Carbamidomethyl)                                       | 5.58 |
| 169 | 5031795   | inhibin beta C chain                                 | EQEcEIISFAETGLSTInQTR             | C4(Carbamidomethyl); N18(Deamidated)                                        | 3.34 |
| 170 | 530377669 | plasma kallikrein                                    | IYSGILnLSDITK                     | N7(Deamidated)                                                              | 4.16 |
| 171 | 4557485   | ceruloplasmin                                        | AGLQAFFVQVEcnK                    | C12(Carbamidomethyl); N13(Deamidated)                                       | 3.73 |
| 172 | 66932947  | alpha-2-macroglobulin                                | SLGNVnFTVSAEALeSQUELcGTEVPSVPEHGR | N6(Deamidated); C20(Carbamidomethyl)                                        | 6.75 |
| 173 | 153082722 | intercellular adhesion molecule 2                    | AAPAQEATATFnSTADR                 | N13(Deamidated)                                                             | 2.89 |
| 174 | 5031863   | galectin-3-binding protein                           | ALGFEnATOALGR                     | N6(Deamidated)                                                              | 3.37 |
| 175 | 4503635   | prothrombin                                          | nFTENDLLVR                        | N1(Deamidated)                                                              | 2.30 |
| 176 | 4502337   | zinc-alpha-2-glycoprotein                            | AREDiFmETLKDIVEYYnDSNGSHVLQGR     | M7(Oxidation); N18(Deamidated)                                              | 7.87 |
| 177 | 336285443 | neural cell adhesion molecule 1                      | DGQLLPSSnYSNIK                    | N9(Deamidated)                                                              | 2.83 |
| 178 | 4826762   | haptoglobin                                          | NLFlnHSENATAK                     | N5(Deamidated)                                                              | 4.42 |
| 179 | 4557287   | angiotensinogen                                      | LOAILGVPWKDKncTSR                 | N13(Deamidated); C14(Carbamidomethyl)                                       | 3.87 |
| 180 | 4505529   | alpha-1-acid glycoprotein 2                          | SVQEIQATFFYFTpK                   | N15(Deamidated)                                                             | 3.35 |
| 181 | 21264357  | mannan-binding lectin serine protease 1              | FGYILHTDnR                        | N9(Deamidated)                                                              | 3.00 |
| 182 | 4503143   | cathepsin D                                          | GSLSYLnVTR                        | N7(Deamidated)                                                              | 3.02 |
| 183 | 167857790 | alpha-1-acid glycoprotein 1                          | enGTISR                           | N-Term(Carbamyl); N2(Deamidated)                                            | 2.23 |
| 184 | 62530391  | selenoprotein P                                      | EGYSniSYIVVNHQGISSR               | N5(Deamidated)                                                              | 4.78 |
| 185 | 21489959  | immunoglobulin J chain                               | IIVPLnNREnISDPTSPLR               | N6(Deamidated); N10(Deamidated)                                             | 3.77 |
| 186 | 4502133   | serum amyloid P-component                            | ESVTDHVNLITPLEKPLQnFTLcFR         | N19(Deamidated); C23(Carbamidomethyl)                                       | 6.83 |
| 187 | 530373049 | biotinidase                                          | YQFNTNVVFSNnGTLVDR                | N12(Deamidated)                                                             | 4.26 |
| 188 | 4505529   | alpha-1-acid glycoprotein 2                          | EnGTVSR                           | N2(Deamidated)                                                              | 2.03 |
| 189 | 261878614 | inter-alpha-trypsin inhibitor heavy chain H1         | AnLSSQALQmSLDYGFVTPLTmSIR         | N2(Deamidated); M10(Oxidation); M23(Oxidation)                              | 4.37 |
| 190 | 4504893   | kininogen-1                                          | YNSQnOSNNQFVLYR                   | N5(Deamidated)                                                              | 4.23 |
| 191 | 530377669 | plasma kallikrein                                    | GVNFnVSK                          | N5(Deamidated)                                                              | 2.17 |
| 192 | 5031863   | galectin-3-binding protein                           | TVIRPFYLTnSSGVD                   | N10(Deamidated)                                                             | 3.42 |
| 193 | 5031863   | galectin-3-binding protein                           | EPGSnVTmSVDAEcVPmVR               | N5(Deamidated); M8(Oxidation); C14(Carbamidomethyl); M17(Oxidation)         | 3.50 |
| 194 | 29171717  | phosphatidylinositol-glycan-specific phospholipase D | FHDVSESTHWTPFLnASVHYIR            | N15(Deamidated)                                                             | 3.96 |
| 195 | 27754778  | ficolin-3                                            | VELEDFNGnRTFAHYATFR               | N9(Deamidated)                                                              | 4.00 |
| 196 | 530403048 | alpha-1-antichymotrypsin                             | GLKFnLTETSEAEIHOSFQHLLR           | N5(Deamidated)                                                              | 7.40 |
| 197 | 530370065 | fibronectin                                          | DQcIVDDITYNnDTFHK                 | C3(Carbamidomethyl); N13(Deamidated)                                        | 5.11 |
| 198 | 530366454 | C4b-binding protein alpha chain                      | DQYVEPEnVTIQcDSGYGVGQPSITcSgNR    | N8(Deamidated); C13(Carbamidomethyl); C27(Carbamidomethyl); N30(Deamidated) | 3.96 |
| 199 | 530403990 | kallistatin                                          | SQILEGLGFnlTELESSESVHR            | N10(Deamidated)                                                             | 5.13 |
| 200 | 62739186  | complement factor H                                  | SPDVInGSPISQK                     | N6(Deamidated)                                                              | 3.51 |

12 Supplemental Digital Content 2.xlsx

|   |   |        |        |      |         |         |         |         |         |         |         |        |        |        |         |        |  |
|---|---|--------|--------|------|---------|---------|---------|---------|---------|---------|---------|--------|--------|--------|---------|--------|--|
| 0 | 2 | 508.2  | 1015.4 | 16.0 | 5.734   | 21.323  | 9.588   | 4.488   | 5.998   | 5.951   | 7.842   | 5.230  | 5.097  | 7.907  | 7.916   | 1.570  |  |
| 0 | 2 | 474.7  | 948.4  | 19.6 | 4.300   | 21.323  | 4.109   | 4.488   | 4.499   | 3.570   | 4.705   | 3.922  | 5.097  | 3.954  | 5.997   | 1.708  |  |
| 0 | 3 | 688.0  | 2062.0 | 36.2 | 0.014   | 0.071   | 0.014   | 1.122   | 1.500   | 0.012   | 1.568   | 0.013  | 1.274  | 1.318  | 0.691   | 0.225  |  |
| 0 | 3 | 525.3  | 1573.8 | 54.5 | 0.014   | 0.071   | 0.014   | 1.122   | 0.015   | 0.012   | 0.016   | 0.013  | 0.013  | 0.013  | 0.130   | 0.110  |  |
| 0 | 4 | 795.4  | 3178.5 | 44.9 | 0.014   | 0.071   | 0.014   | 1.122   | 0.015   | 0.012   | 0.016   | 0.013  | 0.013  | 0.013  | 0.130   | 0.110  |  |
| 0 | 2 | 709.8  | 1418.7 | 40.5 | 1.433   | 0.071   | 0.014   | 3.366   | 1.500   | 1.190   | 3.137   | 1.307  | 1.274  | 1.318  | 1.461   | 0.343  |  |
| 0 | 3 | 751.4  | 2252.1 | 50.0 | 0.014   | 0.071   | 1.370   | 1.122   | 1.500   | 2.380   | 0.016   | 0.013  | 2.549  | 0.013  | 0.905   | 0.323  |  |
| 0 | 3 | 749.4  | 2246.0 | 48.2 | 11.468  | 35.539  | 23.284  | 20.197  | 20.995  | 21.423  | 20.389  | 22.227 | 17.840 | 18.450 | 21.181  | 1.904  |  |
| 0 | 3 | 1088.9 | 3264.7 | 72.5 | 0.014   | 0.071   | 0.014   | 0.011   | 0.015   | 1.190   | 0.016   | 1.307  | 2.549  | 2.636  | 0.782   | 0.341  |  |
| 0 | 3 | 809.7  | 2427.1 | 73.0 | 1.433   | 0.071   | 0.014   | 0.011   | 0.015   | 0.012   | 0.016   | 0.013  | 0.013  | 0.013  | 0.161   | 0.141  |  |
| 0 | 2 | 719.4  | 1437.8 | 61.7 | 4.300   | 0.071   | 1.370   | 2.244   | 2.999   | 2.380   | 1.568   | 1.307  | 1.274  | 2.636  | 2.015   | 0.368  |  |
| 0 | 2 | 820.9  | 1640.8 | 53.7 | 2.867   | 0.071   | 2.739   | 3.366   | 1.500   | 3.570   | 1.568   | 3.922  | 5.097  | 2.636  | 2.734   | 0.448  |  |
| 0 | 4 | 854.4  | 3414.6 | 62.0 | 21.502  | 7.108   | 15.066  | 42.638  | 20.995  | 46.416  | 32.936  | 32.687 | 29.308 | 27.675 | 27.633  | 3.794  |  |
| 0 | 2 | 910.4  | 1819.8 | 35.1 | 1.433   | 0.071   | 2.739   | 1.122   | 1.500   | 1.190   | 0.016   | 1.307  | 1.274  | 1.318  | 1.197   | 0.241  |  |
| 0 | 2 | 674.8  | 1348.7 | 48.5 | 0.014   | 14.215  | 1.370   | 0.011   | 0.015   | 0.012   | 0.016   | 1.307  | 1.274  | 1.318  | 1.955   | 1.378  |  |
| 0 | 2 | 611.3  | 1221.6 | 48.8 | 0.014   | 0.071   | 0.014   | 0.011   | 1.500   | 0.012   | 0.016   | 0.013  | 0.013  | 0.013  | 0.168   | 0.148  |  |
| 2 | 5 | 684.1  | 3416.6 | 72.9 | 0.014   | 0.071   | 0.014   | 5.610   | 1.500   | 0.012   | 3.137   | 1.307  | 0.013  | 0.013  | 1.169   | 0.593  |  |
| 0 | 2 | 768.9  | 1536.8 | 43.2 | 0.014   | 0.071   | 1.370   | 0.011   | 0.015   | 0.012   | 1.568   | 0.013  | 1.274  | 0.013  | 0.436   | 0.212  |  |
| 0 | 3 | 487.2  | 1459.7 | 28.5 | 113.243 | 234.556 | 262.973 | 111.083 | 121.469 | 105.924 | 111.355 | 94.138 | 61.165 | 98.838 | 131.474 | 20.338 |  |
| 2 | 4 | 497.5  | 1987.0 | 40.1 | 0.014   | 0.071   | 1.370   | 0.011   | 0.015   | 0.012   | 0.016   | 0.013  | 0.013  | 1.318  | 0.285   | 0.177  |  |
| 0 | 2 | 961.0  | 1920.9 | 67.3 | 0.014   | 0.071   | 1.370   | 1.122   | 0.015   | 1.190   | 1.568   | 1.307  | 1.274  | 2.636  | 1.057   | 0.261  |  |
| 0 | 3 | 412.9  | 1236.6 | 33.4 | 1.433   | 0.071   | 0.014   | 0.011   | 1.500   | 0.012   | 0.016   | 1.307  | 0.013  | 0.013  | 0.439   | 0.213  |  |
| 0 | 2 | 555.8  | 1110.6 | 40.2 | 1.433   | 0.071   | 1.370   | 1.122   | 1.500   | 1.190   | 0.016   | 1.307  | 1.274  | 1.318  | 1.060   | 0.173  |  |
| 0 | 2 | 410.7  | 820.4  | 18.8 | 4.300   | 35.539  | 5.479   | 4.488   | 5.998   | 5.951   | 6.274   | 6.537  | 12.743 | 11.861 | 9.917   | 2.990  |  |
| 0 | 3 | 708.7  | 2124.0 | 47.5 | 4.300   | 0.071   | 2.739   | 2.244   | 2.999   | 1.190   | 6.274   | 1.307  | 2.549  | 2.636  | 2.631   | 0.545  |  |
| 1 | 3 | 717.4  | 2150.2 | 50.3 | 10.034  | 42.646  | 10.957  | 4.488   | 2.999   | 3.570   | 6.274   | 14.382 | 2.549  | 6.589  | 10.449  | 3.780  |  |
| 0 | 4 | 743.9  | 2972.5 | 70.6 | 5.734   | 0.071   | 5.479   | 16.831  | 16.496  | 5.951   | 14.115  | 13.075 | 10.194 | 6.589  | 9.453   | 1.756  |  |
| 0 | 3 | 697.0  | 2089.0 | 57.1 | 1.433   | 0.071   | 0.014   | 1.122   | 0.015   | 0.012   | 3.137   | 2.615  | 2.549  | 2.636  | 1.360   | 0.407  |  |
| 0 | 2 | 382.2  | 763.4  | 14.1 | 0.014   | 7.108   | 1.370   | 0.011   | 0.015   | 1.190   | 1.568   | 1.307  | 2.549  | 1.318  | 1.645   | 0.660  |  |
| 0 | 3 | 955.1  | 2863.4 | 71.9 | 0.014   | 0.071   | 0.014   | 3.366   | 0.015   | 0.012   | 0.016   | 0.013  | 0.013  | 0.013  | 0.355   | 0.335  |  |
| 0 | 2 | 938.4  | 1875.9 | 40.3 | 11.468  | 7.108   | 12.327  | 10.098  | 7.498   | 4.761   | 7.842   | 2.615  | 6.371  | 10.543 | 8.063   | 0.971  |  |
| 0 | 2 | 433.2  | 865.4  | 27.6 | 2.867   | 0.071   | 1.370   | 2.244   | 2.999   | 2.380   | 3.137   | 2.615  | 2.549  | 2.636  | 2.287   | 0.291  |  |
| 0 | 2 | 835.4  | 1669.8 | 52.4 | 1.433   | 0.071   | 1.370   | 2.244   | 2.999   | 1.190   | 1.568   | 1.307  | 1.274  | 2.636  | 1.609   | 0.263  |  |
| 0 | 3 | 704.3  | 2110.9 | 41.4 | 0.014   | 0.071   | 1.370   | 1.122   | 0.015   | 2.380   | 0.016   | 2.615  | 1.274  | 2.636  | 1.151   | 0.349  |  |
| 0 | 5 | 529.7  | 2644.3 | 51.4 | 1.433   | 0.071   | 0.014   | 0.011   | 0.015   | 0.012   | 0.016   | 0.013  | 0.013  | 0.013  | 0.161   | 0.141  |  |
| 1 | 4 | 572.8  | 2288.1 | 50.7 | 0.014   | 0.071   | 0.014   | 1.122   | 1.500   | 1.190   | 0.016   | 1.307  | 1.274  | 0.013  | 0.652   | 0.211  |  |
| 1 | 5 | 540.7  | 2699.4 | 59.1 | 12.901  | 0.071   | 1.370   | 11.220  | 2.999   | 9.521   | 6.274   | 13.075 | 8.920  | 6.589  | 7.294   | 1.472  |  |
| 0 | 3 | 733.3  | 2198.0 | 58.4 | 12.901  | 14.215  | 2.739   | 11.220  | 7.498   | 8.331   | 9.410   | 6.537  | 8.920  | 3.954  | 8.573   | 1.151  |  |
| 0 | 3 | 1144.5 | 3431.5 | 58.4 | 0.014   | 0.071   | 1.370   | 0.011   | 1.500   | 0.012   | 0.016   | 0.013  | 0.013  | 0.013  | 0.303   | 0.189  |  |
| 0 | 2 | 1173.1 | 2345.2 | 68.0 | 7.167   | 0.071   | 1.370   | 4.488   | 4.499   | 2.380   | 4.705   | 3.922  | 2.549  | 5.271  | 3.642   | 0.654  |  |
| 0 | 2 | 671.8  | 1342.7 | 33.1 | 1.433   | 0.071   | 1.370   | 1.122   | 1.500   | 1.190   | 1.568   | 1.307  | 1.274  | 1.318  | 1.215   | 0.134  |  |

## 12 Supplemental Digital Content 2.xlsx

|         |         |         |         |         |         |        |         |        |        |         |        |       |
|---------|---------|---------|---------|---------|---------|--------|---------|--------|--------|---------|--------|-------|
| 4.000   | 7.545   | 9.191   | 4.663   | 3.638   | 6.579   | 5.543  | 9.009   | 5.580  | 6.905  | 6.265   | 0.613  | 0.340 |
| 5.000   | 5.659   | 4.595   | 3.497   | 3.638   | 3.948   | 4.157  | 4.504   | 4.185  | 4.143  | 4.333   | 0.203  | 0.346 |
| 0.010   | 0.019   | 0.015   | 1.166   | 0.012   | 0.013   | 1.386  | 0.015   | 0.014  | 1.381  | 0.403   | 0.199  | 0.351 |
| 0.010   | 0.019   | 0.015   | 0.012   | 0.012   | 0.013   | 0.014  | 0.015   | 2.790  | 1.381  | 0.428   | 0.296  | 0.358 |
| 0.010   | 0.019   | 0.015   | 0.012   | 0.012   | 0.013   | 1.386  | 0.015   | 0.014  | 2.762  | 0.426   | 0.293  | 0.358 |
| 3.000   | 1.886   | 1.532   | 1.166   | 2.425   | 1.316   | 2.771  | 1.501   | 1.395  | 1.381  | 1.837   | 0.208  | 0.361 |
| 1.000   | 1.886   | 1.532   | 1.166   | 1.213   | 1.316   | 1.386  | 1.501   | 0.014  | 1.381  | 1.239   | 0.156  | 0.363 |
| 10.000  | 18.862  | 18.381  | 30.311  | 13.340  | 21.053  | 12.471 | 18.017  | 18.135 | 26.241 | 18.681  | 1.947  | 0.371 |
| 0.010   | 0.019   | 0.015   | 2.332   | 0.012   | 0.013   | 0.014  | 1.501   | 0.014  | 0.014  | 0.394   | 0.261  | 0.378 |
| 1.000   | 0.019   | 0.015   | 0.012   | 1.213   | 0.013   | 1.386  | 0.015   | 0.014  | 0.014  | 0.370   | 0.183  | 0.379 |
| 4.000   | 3.772   | 3.064   | 1.166   | 4.851   | 1.316   | 2.771  | 1.501   | 1.395  | 1.381  | 2.522   | 0.427  | 0.381 |
| 2.000   | 0.019   | 1.532   | 4.663   | 1.213   | 2.632   | 2.771  | 3.003   | 1.395  | 2.762  | 2.199   | 0.400  | 0.385 |
| 21.000  | 16.976  | 6.127   | 25.648  | 38.808  | 10.527  | 20.785 | 25.524  | 41.850 | 23.478 | 23.072  | 3.503  | 0.389 |
| 1.000   | 3.772   | 0.015   | 1.166   | 1.213   | 1.316   | 1.386  | 1.501   | 1.395  | 2.762  | 1.553   | 0.324  | 0.390 |
| 0.010   | 1.886   | 0.015   | 1.166   | 0.012   | 0.013   | 0.014  | 1.501   | 0.014  | 2.762  | 0.739   | 0.322  | 0.401 |
| 1.000   | 0.019   | 0.015   | 0.012   | 1.213   | 0.013   | 1.386  | 0.015   | 0.014  | 0.014  | 0.370   | 0.183  | 0.402 |
| 1.000   | 0.019   | 0.015   | 2.332   | 0.012   | 1.316   | 0.014  | 0.015   | 0.014  | 1.381  | 0.612   | 0.265  | 0.402 |
| 0.010   | 1.886   | 0.015   | 1.166   | 1.213   | 0.013   | 1.386  | 0.015   | 1.395  | 0.014  | 0.711   | 0.240  | 0.402 |
| 141.000 | 115.056 | 174.622 | 108.420 | 101.871 | 105.267 | 90.066 | 166.657 | 82.305 | 16.573 | 110.184 | 14.281 | 0.403 |
| 1.000   | 0.019   | 0.015   | 0.012   | 0.012   | 0.013   | 0.014  | 0.015   | 0.014  | 0.014  | 0.113   | 0.099  | 0.405 |
| 1.000   | 3.772   | 0.015   | 0.012   | 1.213   | 2.632   | 1.386  | 1.501   | 1.395  | 1.381  | 1.431   | 0.353  | 0.405 |
| 1.000   | 1.886   | 1.532   | 1.166   | 0.012   | 0.013   | 0.014  | 1.501   | 0.014  | 0.014  | 0.715   | 0.245  | 0.406 |
| 1.000   | 1.886   | 1.532   | 1.166   | 0.012   | 1.316   | 1.386  | 1.501   | 1.395  | 1.381  | 1.257   | 0.157  | 0.409 |
| 4.000   | 11.317  | 6.127   | 10.492  | 4.851   | 6.579   | 5.543  | 7.507   | 6.975  | 9.668  | 7.306   | 0.774  | 0.409 |
| 3.000   | 1.886   | 3.064   | 2.332   | 3.638   | 2.632   | 5.543  | 1.501   | 4.185  | 4.143  | 3.192   | 0.384  | 0.411 |
| 4.000   | 3.772   | 4.595   | 10.492  | 10.915  | 5.263   | 4.157  | 1.501   | 11.160 | 15.192 | 7.105   | 1.408  | 0.418 |
| 20.000  | 5.659   | 3.064   | 8.161   | 13.340  | 15.790  | 13.856 | 13.513  | 8.370  | 12.430 | 11.418  | 1.601  | 0.419 |
| 3.000   | 5.659   | 0.015   | 0.012   | 2.425   | 0.013   | 1.386  | 1.501   | 1.395  | 4.143  | 1.955   | 0.596  | 0.421 |
| 0.010   | 1.886   | 0.015   | 0.012   | 0.012   | 1.316   | 1.386  | 3.003   | 1.395  | 1.381  | 1.042   | 0.320  | 0.421 |
| 0.010   | 0.019   | 0.015   | 1.166   | 0.012   | 1.316   | 0.014  | 1.501   | 1.395  | 1.381  | 0.683   | 0.224  | 0.426 |
| 8.000   | 18.862  | 9.191   | 6.995   | 8.489   | 6.579   | 12.471 | 9.009   | 9.765  | 4.143  | 9.350   | 1.262  | 0.429 |
| 2.000   | 3.772   | 3.064   | 2.332   | 3.638   | 1.316   | 1.386  | 3.003   | 2.790  | 2.762  | 2.606   | 0.268  | 0.430 |
| 2.000   | 1.886   | 1.532   | 2.332   | 1.213   | 2.632   | 1.386  | 1.501   | 1.395  | 2.762  | 1.864   | 0.175  | 0.431 |
| 2.000   | 0.019   | 0.015   | 4.663   | 1.213   | 2.632   | 0.014  | 1.501   | 1.395  | 2.762  | 1.621   | 0.468  | 0.431 |
| 0.010   | 0.019   | 3.064   | 0.012   | 1.213   | 0.013   | 0.014  | 0.015   | 0.014  | 0.014  | 0.439   | 0.315  | 0.432 |
| 0.010   | 0.019   | 1.532   | 1.166   | 0.012   | 0.013   | 0.014  | 0.015   | 0.014  | 1.381  | 0.418   | 0.207  | 0.438 |
| 4.000   | 1.886   | 0.015   | 12.824  | 3.638   | 5.263   | 4.157  | 7.507   | 5.580  | 12.430 | 5.730   | 1.316  | 0.439 |
| 7.000   | 3.772   | 1.532   | 6.995   | 9.702   | 6.579   | 12.471 | 7.507   | 6.975  | 11.049 | 7.358   | 1.017  | 0.439 |
| 0.010   | 0.019   | 0.015   | 1.166   | 0.012   | 0.013   | 0.014  | 0.015   | 0.014  | 0.014  | 0.129   | 0.115  | 0.442 |
| 17.000  | 3.772   | 1.532   | 3.497   | 6.064   | 3.948   | 4.157  | 4.504   | 1.395  | 2.762  | 4.863   | 1.417  | 0.444 |
| 1.000   | 0.019   | 1.532   | 1.166   | 1.213   | 1.316   | 1.386  | 0.015   | 1.395  | 1.381  | 1.042   | 0.177  | 0.446 |



## 12 Supplemental Digital Content 2.xlsx

|     |           |                                                 |                                  |                                                                                             |      |
|-----|-----------|-------------------------------------------------|----------------------------------|---------------------------------------------------------------------------------------------|------|
| 201 | 530378934 | complement component C6                         | VLnFTTK                          | N3(Deamidated)                                                                              | 1.98 |
| 202 | 4505047   | lumican                                         | AFEnVTDLOWLILDHNLLENSK           | N4(Deamidated)                                                                              | 5.10 |
| 203 | 178557739 | complement C4-B                                 | nTTcQDLQIEVTVK                   | N1(Deamidated); C4(Carbamidomethyl)                                                         | 3.81 |
| 204 | 153266841 | beta-2-glycoprotein 1                           | VYKPSAGnNSLYR                    | N8(Deamidated)                                                                              | 3.82 |
| 205 | 4826762   | haptoglobin                                     | mVSHHnLTTGATLINEQWLLTTAK         | M1(Oxidation); N6(Deamidated)                                                               | 7.67 |
| 206 | 262231791 | complement factor H-related protein 3           | LGYNAnTSILSFOAVcR                | N6(Deamidated); C16(Carbamidomethyl)                                                        | 3.62 |
| 207 | 89191868  | von Willebrand factor                           | mEAcmLnGTVIGPGK                  | M1(Oxidation); C4(Carbamidomethyl); M5(Oxidation); N7(Deamidated)                           | 3.78 |
| 208 | 5453914   | phospholipid transfer protein                   | IYSnHSALESALIPLOAPLK             | N4(Deamidated)                                                                              | 5.47 |
| 209 | 4502337   | zinc-alpha-2-glycoprotein                       | FGcEIEnnR                        | C3(Carbamidomethyl); N7(Deamidated); N8(Deamidated)                                         | 2.79 |
| 210 | 530377669 | plasma kallikrein                               | LQAPLnYTEFQKPicLPSK              | N6(Deamidated); C15(Carbamidomethyl)                                                        | 4.58 |
| 211 | 27262659  | macrophage colony-stimulating factor 1 receptor | VTVQSLLTVEtLEHnQTYEcR            | N15(Deamidated); C20(Carbamidomethyl)                                                       | 4.44 |
| 212 | 118442839 | complement factor H-related protein 1           | LQNNEnniScVER                    | N7(Deamidated); C10(Carbamidomethyl)                                                        | 3.69 |
| 213 | 34734068  | fibulin-1                                       | cATPHGdnASLEATFVK                | C1(Carbamidomethyl); N8(Deamidated)                                                         | 3.29 |
| 214 | 530403906 | plasma serine protease inhibitor                | VVGVPYQGNATALFILPSEGK            | N9(Deamidated)                                                                              | 3.61 |
| 215 | 73858564  | corticosteroid-binding globulin                 | AQLLOGLGFnLTER                   | N10(Deamidated)                                                                             | 3.85 |
| 216 | 166362713 | cadherin-5                                      | FILnTENNFtLTDNHDNTAnITVK         | N4(Deamidated); N20(Deamidated)                                                             | 4.21 |
| 217 | 4506547   | ribonuclease pancreatic                         | SnSSmHITDcR                      | N2(Deamidated); M5(Oxidation); C10(Carbamidomethyl)                                         | 2.46 |
| 218 | 530373049 | biotinidase                                     | DVQIIVFPEDGIHGFnFTR              | N16(Deamidated)                                                                             | 5.53 |
| 219 | 262231791 | complement factor H-related protein 3           | KFVQGNSTEVAcHPGYGLPK             | N6(Deamidated); C12(Carbamidomethyl)                                                        | 4.92 |
| 220 | 209529703 | signal-regulatory protein beta-1                | GTAnLSETIR                       | N4(Deamidated)                                                                              | 2.27 |
| 221 | 62912462  | C4b-binding protein beta chain                  | KTLFcnASK                        | C5(Carbamidomethyl); N6(Deamidated)                                                         | 2.33 |
| 222 | 4502261   | antithrombin-III                                | LGAcnDTLQQLMEVFK                 | C4(Carbamidomethyl); N5(Deamidated)                                                         | 4.34 |
| 223 | 5031863   | galectin-3-binding protein                      | AAIPSALDTnSSK                    | N10(Deamidated)                                                                             | 3.27 |
| 224 | 88853069  | vitronectin                                     | nGSLFAFR                         | N1(Deamidated)                                                                              | 2.76 |
| 225 | 189163530 | alpha-1-antitrypsin                             | ADTHDEILEGLnFNLTEIPEAQIHEGFQELLR | N12(Deamidated)                                                                             | 7.60 |
| 226 | 70906437  | fibrinogen gamma chain                          | DLQSLLEDILHQVEnKTSEVK            | N14(Deamidated)                                                                             | 3.34 |
| 227 | 543871461 | noelin                                          | SmVDFmNTDnFTSHR                  | M2(Oxidation); M6(Oxidation); N10(Deamidated)                                               | 2.09 |
| 228 | 89191868  | von Willebrand factor                           | GQVYLQcGTPcnLTcR                 | C7(Carbamidomethyl); C11(Carbamidomethyl); N12(Deamidated); C15(Carbamidomethyl)            | 2.45 |
| 229 | 530377645 | complement factor I                             | LSDLInSTEcLHVHcR                 | N7(Deamidated); C11(Carbamidomethyl); C16(Carbamidomethyl)                                  | 4.33 |
| 230 | 73858564  | corticosteroid-binding globulin                 | VTISGVYDLGDVLEmGIADLFTNOAnFSR    | M16(Oxidation); N27(Deamidated)                                                             | 5.60 |
| 231 | 166795301 | prenylcysteine oxidase 1                        | GELnTSIFSSRPIDK                  | N4(Deamidated)                                                                              | 3.54 |
| 232 | 156616294 | N-acetylmuramoyl-L-alanine amidase              | LEPVHLQLQcmSQEQLAQVAAnATK        | C10(Carbamidomethyl); M11(Oxidation); N22(Deamidated)                                       | 5.91 |
| 233 | 153266841 | beta-2-glycoprotein 1                           | DTAVFEcLPQHAmFGnDTITcTTHGnWTK    | C7(Carbamidomethyl); M13(Oxidation); N16(Deamidated); C21(Carbamidomethyl); N26(Deamidated) | 4.81 |
| 234 | 530395269 | hemopexin                                       | SWPAVGncSSALR                    | N7(Deamidated); C8(Carbamidomethyl)                                                         | 3.42 |
| 235 | 262050538 | inter-alpha-trypsin inhibitor heavy chain H4    | AFITnFSmIIDGmTYPGIK              | N5(Deamidated); M8(Oxidation); M13(Oxidation)                                               | 3.79 |
| 236 | 105990532 | apolipoprotein B-100                            | FEVDSPVYnATWSASLK                | N9(Deamidated)                                                                              | 4.24 |
| 237 | 530423914 | phosphatidylcholine-sterol acyltransferase      | AELSnHTRPVILVPGcLGNQLEAK         | N5(Deamidated); C16(Carbamidomethyl)                                                        | 6.42 |
| 238 | 530374398 | fetuin-B                                        | VLYLAAyncTLRPVSK                 | N8(Deamidated); C9(Carbamidomethyl)                                                         | 4.71 |
| 239 | 4557287   | angiotensinogen                                 | VYIHPFHLVIHnESTcEQLAK            | N12(Deamidated); C16(Carbamidomethyl)                                                       | 6.73 |
| 240 | 530381557 | probable G-protein coupled receptor 116         | ANEQVQSLnQTYK                    | N10(Deamidated)                                                                             | 2.04 |

## 12 Supplemental Digital Content 2.xlsx

|   |   |        |        |      |        |         |         |         |        |         |         |         |         |        |        |        |  |
|---|---|--------|--------|------|--------|---------|---------|---------|--------|---------|---------|---------|---------|--------|--------|--------|--|
| 0 | 2 | 412.2  | 823.5  | 31.4 | 2.867  | 0.071   | 1.370   | 2.244   | 2.999  | 1.190   | 3.137   | 2.615   | 2.549   | 2.636  | 2.168  | 0.311  |  |
| 0 | 3 | 871.8  | 2613.3 | 77.0 | 2.867  | 0.071   | 0.014   | 3.366   | 1.500  | 0.012   | 3.137   | 1.307   | 5.097   | 1.318  | 1.869  | 0.539  |  |
| 0 | 2 | 825.4  | 1649.8 | 45.8 | 2.867  | 0.071   | 2.739   | 8.976   | 4.499  | 8.331   | 6.274   | 10.460  | 6.371   | 5.271  | 5.586  | 1.006  |  |
| 0 | 3 | 490.6  | 1469.7 | 25.3 | 10.034 | 14.215  | 9.588   | 11.220  | 11.997 | 4.761   | 9.410   | 7.845   | 8.920   | 7.907  | 9.590  | 0.815  |  |
| 0 | 4 | 674.8  | 2696.4 | 54.0 | 78.840 | 113.724 | 124.638 | 28.051  | 58.485 | 20.233  | 51.757  | 26.149  | 20.388  | 23.721 | 54.599 | 12.397 |  |
| 0 | 2 | 958.0  | 1914.9 | 58.4 | 2.867  | 0.071   | 0.014   | 0.011   | 0.015  | 0.012   | 0.016   | 0.013   | 0.013   | 2.636  | 0.567  | 0.365  |  |
| 0 | 2 | 805.9  | 1610.7 | 35.0 | 1.433  | 0.071   | 2.739   | 2.244   | 2.999  | 2.380   | 1.568   | 2.615   | 2.549   | 2.636  | 2.124  | 0.277  |  |
| 0 | 3 | 760.4  | 2279.3 | 67.7 | 4.300  | 7.108   | 1.370   | 1.122   | 4.499  | 3.570   | 1.568   | 2.615   | 2.549   | 6.589  | 3.529  | 0.665  |  |
| 0 | 2 | 570.7  | 1140.5 | 26.8 | 2.867  | 0.071   | 4.109   | 3.366   | 5.998  | 4.761   | 4.705   | 3.922   | 3.823   | 6.589  | 4.021  | 0.567  |  |
| 0 | 3 | 750.1  | 2248.2 | 54.7 | 1.433  | 0.071   | 1.370   | 1.122   | 1.500  | 1.190   | 1.568   | 1.307   | 1.274   | 0.013  | 1.085  | 0.179  |  |
| 0 | 3 | 841.1  | 2521.2 | 56.3 | 0.014  | 0.071   | 0.014   | 0.011   | 1.500  | 1.190   | 0.016   | 1.307   | 1.274   | 1.318  | 0.672  | 0.217  |  |
| 0 | 2 | 795.9  | 1590.7 | 26.4 | 1.433  | 0.071   | 9.588   | 8.976   | 11.997 | 9.521   | 7.842   | 5.230   | 6.371   | 9.225  | 7.025  | 1.202  |  |
| 0 | 3 | 606.9  | 1818.8 | 35.6 | 1.433  | 0.071   | 1.370   | 1.122   | 1.500  | 0.012   | 1.568   | 0.013   | 0.013   | 1.318  | 0.842  | 0.225  |  |
| 0 | 2 | 1081.1 | 2161.2 | 67.0 | 1.433  | 0.071   | 0.014   | 0.011   | 1.500  | 0.012   | 0.016   | 0.013   | 0.013   | 0.013  | 0.310  | 0.193  |  |
| 0 | 3 | 521.0  | 1560.8 | 62.8 | 7.167  | 7.108   | 4.109   | 5.610   | 5.998  | 3.570   | 7.842   | 5.230   | 6.371   | 6.589  | 5.960  | 0.430  |  |
| 0 | 3 | 917.8  | 2751.3 | 55.4 | 0.014  | 0.071   | 0.014   | 1.122   | 0.015  | 0.012   | 1.568   | 0.013   | 0.013   | 0.013  | 0.286  | 0.180  |  |
| 0 | 3 | 442.2  | 1324.5 | 14.9 | 0.014  | 0.071   | 0.014   | 0.011   | 0.015  | 0.012   | 0.016   | 1.307   | 0.013   | 1.318  | 0.279  | 0.172  |  |
| 0 | 3 | 735.7  | 2205.1 | 71.0 | 4.300  | 0.071   | 1.370   | 3.366   | 2.999  | 3.570   | 3.137   | 0.013   | 3.823   | 2.636  | 2.529  | 0.482  |  |
| 1 | 4 | 548.3  | 2190.1 | 32.3 | 0.014  | 0.071   | 0.014   | 0.011   | 0.015  | 0.012   | 0.016   | 0.013   | 1.274   | 1.318  | 0.276  | 0.170  |  |
| 0 | 2 | 531.8  | 1062.5 | 28.0 | 0.014  | 0.071   | 0.014   | 0.011   | 0.015  | 0.012   | 0.016   | 0.013   | 1.274   | 1.318  | 0.276  | 0.170  |  |
| 1 | 3 | 357.2  | 1069.5 | 18.8 | 1.433  | 0.071   | 1.370   | 1.122   | 0.015  | 0.012   | 0.016   | 0.013   | 0.013   | 0.013  | 0.408  | 0.198  |  |
| 0 | 2 | 934.4  | 1867.9 | 76.8 | 14.335 | 0.071   | 5.479   | 11.220  | 13.497 | 8.331   | 9.410   | 7.845   | 10.194  | 9.225  | 8.961  | 1.287  |  |
| 0 | 2 | 638.3  | 1275.6 | 30.6 | 1.433  | 0.071   | 1.370   | 1.122   | 1.500  | 1.190   | 1.568   | 1.307   | 2.549   | 1.318  | 1.343  | 0.189  |  |
| 0 | 2 | 456.7  | 912.5  | 53.4 | 0.014  | 0.071   | 2.739   | 1.122   | 1.500  | 0.012   | 0.016   | 0.013   | 2.549   | 2.636  | 1.067  | 0.381  |  |
| 0 | 4 | 924.0  | 3692.8 | 81.1 | 32.970 | 21.323  | 1.370   | 103.228 | 16.496 | 107.114 | 101.945 | 113.750 | 110.862 | 89.613 | 69.867 | 14.447 |  |
| 1 | 4 | 582.3  | 2326.2 | 68.7 | 0.014  | 0.071   | 0.014   | 0.011   | 0.015  | 1.190   | 0.016   | 0.013   | 0.013   | 1.318  | 0.267  | 0.165  |  |
| 0 | 3 | 612.3  | 1834.7 | 35.2 | 0.014  | 0.071   | 1.370   | 0.011   | 0.015  | 1.190   | 0.016   | 0.013   | 1.274   | 0.013  | 0.399  | 0.192  |  |
| 0 | 2 | 964.4  | 1927.8 | 40.8 | 0.014  | 0.071   | 0.014   | 0.011   | 0.015  | 1.190   | 0.016   | 1.307   | 0.013   | 0.013  | 0.266  | 0.164  |  |
| 0 | 4 | 511.2  | 2041.9 | 36.1 | 4.300  | 0.071   | 4.109   | 1.122   | 0.015  | 0.012   | 0.016   | 1.307   | 0.013   | 1.318  | 1.228  | 0.527  |  |
| 0 | 3 | 1097.9 | 3291.6 | 90.0 | 1.433  | 0.071   | 0.014   | 4.488   | 0.015  | 10.711  | 7.842   | 9.152   | 10.194  | 5.271  | 4.919  | 1.382  |  |
| 0 | 3 | 555.6  | 1664.8 | 43.7 | 1.433  | 0.071   | 0.014   | 1.122   | 0.015  | 0.012   | 0.016   | 0.013   | 0.013   | 0.013  | 0.272  | 0.169  |  |
| 0 | 3 | 942.1  | 2824.4 | 53.3 | 1.433  | 0.071   | 1.370   | 3.366   | 1.500  | 2.380   | 3.137   | 2.615   | 2.549   | 2.636  | 2.106  | 0.316  |  |
| 0 | 4 | 843.4  | 3370.4 | 54.5 | 0.014  | 0.071   | 2.739   | 0.011   | 1.500  | 0.012   | 0.016   | 1.307   | 0.013   | 1.318  | 0.700  | 0.304  |  |
| 0 | 2 | 703.3  | 1405.7 | 40.5 | 8.601  | 14.215  | 8.218   | 2.244   | 4.499  | 1.190   | 3.137   | 1.307   | 2.549   | 2.636  | 4.860  | 1.330  |  |
| 0 | 2 | 1133.1 | 2265.1 | 76.4 | 12.901 | 0.071   | 4.109   | 10.098  | 0.015  | 7.141   | 12.547  | 19.612  | 10.194  | 7.907  | 8.460  | 1.912  |  |
| 0 | 3 | 639.0  | 1914.9 | 60.2 | 5.734  | 0.071   | 5.479   | 2.244   | 4.499  | 0.012   | 6.274   | 1.307   | 0.013   | 2.636  | 2.827  | 0.791  |  |
| 0 | 4 | 655.1  | 2617.4 | 47.9 | 1.433  | 0.071   | 1.370   | 1.122   | 1.500  | 0.012   | 1.568   | 1.307   | 1.274   | 1.318  | 1.098  | 0.180  |  |
| 0 | 3 | 623.7  | 1869.0 | 47.2 | 1.433  | 0.071   | 1.370   | 1.122   | 1.500  | 0.012   | 1.568   | 0.013   | 1.274   | 1.318  | 0.968  | 0.208  |  |
| 0 | 3 | 846.1  | 2536.3 | 41.9 | 4.300  | 0.071   | 5.479   | 5.610   | 7.498  | 3.570   | 10.979  | 10.460  | 3.823   | 5.271  | 5.706  | 1.031  |  |
| 0 | 2 | 811.9  | 1622.8 | 36.6 | 0.014  | 0.071   | 0.014   | 0.011   | 0.015  | 0.012   | 0.016   | 0.013   | 0.013   | 1.318  | 0.150  | 0.130  |  |

12 Supplemental Digital Content 2.xlsx

|         |         |         |         |        |         |        |         |        |         |        |        |       |
|---------|---------|---------|---------|--------|---------|--------|---------|--------|---------|--------|--------|-------|
| 2.000   | 1.886   | 3.064   | 1.166   | 2.425  | 2.632   | 2.771  | 3.003   | 2.790  | 2.762   | 2.450  | 0.189  | 0.447 |
| 2.000   | 1.886   | 0.015   | 3.497   | 4.851  | 2.632   | 4.157  | 0.015   | 4.185  | 1.381   | 2.462  | 0.541  | 0.447 |
| 5.000   | 1.886   | 0.015   | 8.161   | 1.213  | 5.263   | 5.543  | 7.507   | 5.580  | 5.524   | 4.569  | 0.845  | 0.449 |
| 7.000   | 9.431   | 13.786  | 9.326   | 12.127 | 13.158  | 15.242 | 6.006   | 9.765  | 9.668   | 10.551 | 0.938  | 0.449 |
| 134.000 | 115.056 | 142.455 | 34.974  | 77.616 | 64.476  | 31.870 | 28.527  | 62.775 | 4.143   | 69.589 | 15.001 | 0.451 |
| 0.010   | 0.019   | 0.015   | 1.166   | 0.012  | 1.316   | 0.014  | 0.015   | 0.014  | 0.014   | 0.259  | 0.164  | 0.452 |
| 2.000   | 1.886   | 1.532   | 2.332   | 3.638  | 2.632   | 1.386  | 3.003   | 2.790  | 2.762   | 2.396  | 0.222  | 0.453 |
| 1.000   | 7.545   | 1.532   | 4.663   | 2.425  | 2.632   | 1.386  | 3.003   | 2.790  | 1.381   | 2.836  | 0.624  | 0.457 |
| 4.000   | 9.431   | 1.532   | 4.663   | 2.425  | 6.579   | 5.543  | 4.504   | 4.185  | 4.143   | 4.701  | 0.691  | 0.457 |
| 3.000   | 1.886   | 1.532   | 0.012   | 1.213  | 0.013   | 1.386  | 1.501   | 1.395  | 1.381   | 1.332  | 0.272  | 0.458 |
| 0.010   | 1.886   | 0.015   | 1.166   | 1.213  | 0.013   | 0.014  | 0.015   | 0.014  | 0.014   | 0.436  | 0.223  | 0.459 |
| 12.000  | 1.886   | 3.064   | 11.658  | 9.702  | 13.158  | 4.157  | 6.006   | 9.765  | 12.430  | 8.383  | 1.336  | 0.460 |
| 1.000   | 0.019   | 0.015   | 1.166   | 1.213  | 1.316   | 0.014  | 0.015   | 1.395  | 0.014   | 0.617  | 0.203  | 0.466 |
| 1.000   | 0.019   | 1.532   | 0.012   | 1.213  | 0.013   | 1.386  | 0.015   | 0.014  | 0.014   | 0.522  | 0.211  | 0.468 |
| 4.000   | 3.772   | 6.127   | 6.995   | 4.851  | 5.263   | 5.543  | 6.006   | 4.185  | 8.287   | 5.503  | 0.448  | 0.472 |
| 0.010   | 0.019   | 0.015   | 1.166   | 0.012  | 0.013   | 0.014  | 0.015   | 0.014  | 0.014   | 0.129  | 0.115  | 0.473 |
| 0.010   | 0.019   | 0.015   | 1.166   | 0.012  | 0.013   | 0.014  | 0.015   | 0.014  | 0.014   | 0.129  | 0.115  | 0.479 |
| 4.000   | 1.886   | 1.532   | 2.332   | 1.213  | 1.316   | 2.771  | 1.501   | 4.185  | 0.014   | 2.075  | 0.407  | 0.482 |
| 0.010   | 0.019   | 0.015   | 1.166   | 0.012  | 0.013   | 0.014  | 0.015   | 0.014  | 0.014   | 0.129  | 0.115  | 0.485 |
| 0.010   | 0.019   | 0.015   | 1.166   | 0.012  | 0.013   | 0.014  | 0.015   | 0.014  | 0.014   | 0.129  | 0.115  | 0.485 |
| 1.000   | 0.019   | 0.015   | 0.012   | 1.213  | 0.013   | 0.014  | 0.015   | 0.014  | 0.014   | 0.233  | 0.146  | 0.487 |
| 11.000  | 9.431   | 6.127   | 9.326   | 10.915 | 10.527  | 13.856 | 12.011  | 8.370  | 8.287   | 9.985  | 0.686  | 0.492 |
| 1.000   | 1.886   | 1.532   | 1.166   | 1.213  | 1.316   | 1.386  | 1.501   | 1.395  | 2.762   | 1.516  | 0.158  | 0.492 |
| 0.010   | 0.019   | 1.532   | 0.012   | 0.012  | 0.013   | 2.771  | 1.501   | 0.014  | 1.381   | 0.727  | 0.315  | 0.500 |
| 66.000  | 52.813  | 19.913  | 109.585 | 58.212 | 103.952 | 84.524 | 109.603 | 97.651 | 117.392 | 81.964 | 10.021 | 0.500 |
| 0.010   | 0.019   | 0.015   | 1.166   | 0.012  | 0.013   | 0.014  | 0.015   | 0.014  | 0.014   | 0.129  | 0.115  | 0.500 |
| 1.000   | 0.019   | 0.015   | 0.012   | 1.213  | 0.013   | 0.014  | 0.015   | 0.014  | 0.014   | 0.233  | 0.146  | 0.501 |
| 0.010   | 0.019   | 0.015   | 1.166   | 0.012  | 0.013   | 0.014  | 0.015   | 0.014  | 0.014   | 0.129  | 0.115  | 0.502 |
| 3.000   | 0.019   | 0.015   | 1.166   | 2.425  | 1.316   | 0.014  | 0.015   | 0.014  | 0.014   | 0.800  | 0.359  | 0.510 |
| 8.000   | 1.886   | 0.015   | 10.492  | 4.851  | 6.579   | 5.543  | 4.504   | 6.975  | 12.430  | 6.128  | 1.170  | 0.513 |
| 0.010   | 0.019   | 0.015   | 0.012   | 1.213  | 0.013   | 0.014  | 0.015   | 0.014  | 0.014   | 0.134  | 0.120  | 0.513 |
| 1.000   | 3.772   | 0.015   | 3.497   | 3.638  | 0.013   | 6.928  | 1.501   | 2.790  | 2.762   | 2.592  | 0.660  | 0.515 |
| 1.000   | 1.886   | 1.532   | 0.012   | 1.213  | 0.013   | 1.386  | 0.015   | 2.790  | 0.014   | 0.986  | 0.305  | 0.515 |
| 7.000   | 3.772   | 6.127   | 0.012   | 6.064  | 3.948   | 6.928  | 0.015   | 4.185  | 0.014   | 3.806  | 0.905  | 0.521 |
| 11.000  | 7.545   | 7.659   | 11.658  | 0.012  | 14.474  | 0.014  | 7.507   | 8.370  | 0.014   | 6.825  | 1.642  | 0.525 |
| 3.000   | 7.545   | 6.127   | 1.166   | 2.425  | 5.263   | 4.157  | 0.015   | 4.185  | 1.381   | 3.526  | 0.751  | 0.529 |
| 1.000   | 0.019   | 0.015   | 0.012   | 1.213  | 1.316   | 1.386  | 1.501   | 1.395  | 1.381   | 0.924  | 0.203  | 0.530 |
| 1.000   | 0.019   | 0.015   | 1.166   | 1.213  | 2.632   | 0.014  | 0.015   | 1.395  | 0.014   | 0.748  | 0.281  | 0.537 |
| 5.000   | 1.886   | 3.064   | 5.829   | 8.489  | 7.895   | 4.157  | 10.510  | 6.975  | 12.430  | 6.623  | 1.046  | 0.540 |
| 0.010   | 0.019   | 0.015   | 0.012   | 0.012  | 0.013   | 1.386  | 0.015   | 0.014  | 1.381   | 0.288  | 0.183  | 0.546 |

## 12 Supplemental Digital Content 2.xlsx

|     |           |                                                           |                                   |                                                                            |      |
|-----|-----------|-----------------------------------------------------------|-----------------------------------|----------------------------------------------------------------------------|------|
| 241 | 530395269 | hemopexin                                                 | nGTGHGnSTHHGPEYmR                 | N1(Deamidated); N7(Deamidated); M16(Oxidation)                             | 4.04 |
| 242 | 530417477 | IgGfC-binding protein                                     | SVTLQIYnHSLTLSAR                  | N8(Deamidated)                                                             | 4.56 |
| 243 | 16418467  | leucine-rich alpha-2-glycoprotein                         | KLPPGLLAnFTLLR                    | N9(Deamidated)                                                             | 4.88 |
| 244 | 513126885 | carboxypeptidase B2                                       | AHLnVSGIPcSVLLADVEDLIQQQISnDTVSPR | N4(Deamidated); C10(Carbamidomethyl); N27(Deamidated)                      | 5.49 |
| 245 | 178557739 | complement C4-B                                           | gLnVTLSSSTGR                      | N-Term(Carbamyl); N3(Deamidated)                                           | 3.39 |
| 246 | 133925809 | inter-alpha-trypsin inhibitor heavy chain H3              | NAHGEEKEEnLTAR                    | N9(Deamidated)                                                             | 4.48 |
| 247 | 5031863   | galectin-3-binding protein                                | YKGLnLTEDTYKPR                    | N5(Deamidated)                                                             | 4.08 |
| 248 | 133925809 | inter-alpha-trypsin inhibitor heavy chain H3              | TAFITnFTLTIDGVTYPGNVK             | N6(Deamidated)                                                             | 4.04 |
| 249 | 324021743 | vitamin D-binding protein                                 | LcDnLSTK                          | C2(Carbamidomethyl); N4(Deamidated)                                        | 2.33 |
| 250 | 530377645 | complement factor I                                       | LISncSK                           | N4(Deamidated); C5(Carbamidomethyl)                                        | 1.92 |
| 251 | 27262659  | macrophage colony-stimulating factor 1 receptor           | VLTlnLDQVDFQHAGnYScVASNVQ GK      | N5(Deamidated); N16(Deamidated); C19(Carbamidomethyl)                      | 5.88 |
| 252 | 89191868  | von Willebrand factor                                     | IGEADFnR                          | N7(Deamidated)                                                             | 2.35 |
| 253 | 32171249  | prostaglandin-H2 D-isomerase                              | SVVAPATDGGLnLTSTFLR               | N12(Deamidated)                                                            | 4.96 |
| 254 | 13540563  | complement factor H-related protein 5                     | EQFcPPPPQIPnAQnmTTTVNYQDGEK       | C4(Carbamidomethyl); N12(Deamidated); N15(Deamidated); M16(Oxidation)      | 2.34 |
| 255 | 530407092 | aminopeptidase N                                          | AEFnITLIHPK                       | N4(Deamidated)                                                             | 2.55 |
| 256 | 4504489   | histidine-rich glycoprotein                               | HSHNNnSSDLHPHK                    | N6(Deamidated)                                                             | 6.05 |
| 257 | 310923191 | leptin receptor                                           | YSEnSTTVIR                        | N4(Deamidated)                                                             | 2.37 |
| 258 | 21071030  | alpha-1B-glycoprotein                                     | REGDHEFLVPEAQEDVEATFPVHOPGnYScSYR | N28(Deamidated); C31(Carbamidomethyl)                                      | 8.06 |
| 259 | 88853069  | vitronectin                                               | NnATVHEQVGGPSLTSDLQAQSK           | N2(Deamidated)                                                             | 6.51 |
| 260 | 530395269 | hemopexin                                                 | ALPQPQnVTSLLGcTH                  | N7(Deamidated); C14(Carbamidomethyl)                                       | 4.23 |
| 261 | 5031863   | galectin-3-binding protein                                | DAGVvcTnETR                       | C6(Carbamidomethyl); N8(Deamidated)                                        | 3.49 |
| 262 | 27894328  | interleukin-1 receptor-like 1                             | FIHNENGA nYSVTATR                 | N9(Deamidated)                                                             | 3.67 |
| 263 | 285002214 | cadherin-related family member 2                          | LLFNLLPGPYSHnFSLDPDTGLLR          | N13(Deamidated)                                                            | 4.07 |
| 264 | 68161541  | carcinoembryonic antigen-related cell adhesion molecule 1 | LSQGnTTLSINPVK                    | N5(Deamidated)                                                             | 3.07 |
| 265 | 530417477 | IgGfC-binding protein                                     | GLcVLSVGAnLTTFDGAR                | C3(Carbamidomethyl); N10(Deamidated)                                       | 4.02 |
| 266 | 21450863  | attractin                                                 | AATcINPLnGSVcERPA nHSAK           | C4(Carbamidomethyl); N9(Deamidated); C13(Carbamidomethyl); N18(Deamidated) | 4.38 |
| 267 | 70778918  | inter-alpha-trypsin inhibitor heavy chain H2              | GAFISnFSmTVDGK                    | N6(Deamidated); M9(Oxidation)                                              | 3.03 |
| 268 | 4557389   | complement component C8 alpha chain                       | GGSSGWSGGLAQnR                    | N13(Deamidated)                                                            | 3.49 |
| 269 | 105990532 | apolipoprotein B-100                                      | ELcTISHIFIPAmGnITYDFSFK           | C3(Carbamidomethyl); M13(Oxidation); N15(Deamidated)                       | 5.22 |
| 270 | 315434271 | vascular cell adhesion protein 1                          | LDNGnLQHLSGnATLTLIAmR             | N5(Deamidated); N12(Deamidated); M20(Oxidation)                            | 2.79 |
| 271 | 40549451  | lymphatic vessel endothelial hyaluronic acid receptor 1   | ANQQLnFTEAK                       | N6(Deamidated)                                                             | 3.05 |
| 272 | 530375762 | carboxypeptidase N subunit 2                              | AFGNSPnLTK                        | N7(Deamidated)                                                             | 2.72 |
| 273 | 530375091 | cholinesterase                                            | DnNSIITR                          | N2(Deamidated)                                                             | 2.42 |
| 274 | 4502067   | protein AMBP                                              | WnlTmESYVVHTNYDEYAIFLTK           | N2(Deamidated); M5(Oxidation)                                              | 4.24 |
| 275 | 45269141  | multimerin-1                                              | FNPGAESVVLsnSTLK                  | N12(Deamidated)                                                            | 3.67 |
| 276 | 62912462  | C4b-binding protein beta chain                            | EWDnTTTEcR                        | N4(Deamidated); C9(Carbamidomethyl)                                        | 2.51 |
| 277 | 221316616 | extracellular matrix protein 1                            | HIPGLIHmTAR                       | N8(Deamidated); M9(Oxidation)                                              | 2.49 |
| 278 | 67782358  | complement factor B                                       | IVLDPSGSmNIYLVLDGSDSIGASnFTGAK    | M9(Oxidation); N25(Deamidated)                                             | 6.45 |
| 279 | 530391227 | golgi membrane protein 1                                  | AVLVNnITTGER                      | N6(Deamidated)                                                             | 3.00 |
| 280 | 315075331 | SAA2-SAA2 protein                                         | VYLOGLIDcYLFgnSSTVLEDSK           | C9(Carbamidomethyl); N14(Deamidated)                                       | 5.58 |
| 281 | 4505529   | alpha-1-acid glycoprotein 2                               | SVQEIQATFFYFTpNKTEDTIFLR          | N15(Deamidated)                                                            | 6.23 |

12 Supplemental Digital Content 2.xlsx

|   |   |        |        |      |        |        |        |        |        |        |        |        |        |        |        |       |  |
|---|---|--------|--------|------|--------|--------|--------|--------|--------|--------|--------|--------|--------|--------|--------|-------|--|
| 0 | 4 | 468.2  | 1869.8 | 14.6 | 8.601  | 14.215 | 10.957 | 6.732  | 7.498  | 5.951  | 7.842  | 5.230  | 2.549  | 5.271  | 7.485  | 1.033 |  |
| 0 | 2 | 902.5  | 1804.0 | 51.0 | 2.867  | 0.071  | 1.370  | 2.244  | 1.500  | 2.380  | 3.137  | 3.922  | 7.646  | 10.543 | 3.568  | 1.003 |  |
| 1 | 3 | 518.7  | 1553.9 | 63.2 | 15.768 | 0.071  | 10.957 | 10.098 | 14.996 | 11.902 | 9.410  | 13.075 | 12.743 | 13.178 | 11.220 | 1.390 |  |
| 0 | 3 | 1197.6 | 3590.8 | 91.3 | 0.014  | 0.071  | 0.014  | 3.366  | 0.015  | 0.012  | 0.016  | 2.615  | 0.013  | 0.013  | 0.615  | 0.400 |  |
| 0 | 2 | 574.8  | 1148.6 | 46.0 | 10.034 | 14.215 | 10.957 | 8.976  | 11.997 | 8.331  | 10.979 | 7.845  | 10.194 | 9.225  | 10.275 | 0.596 |  |
| 1 | 3 | 490.6  | 1469.7 | 14.7 | 8.601  | 14.215 | 6.848  | 6.732  | 7.498  | 8.331  | 9.410  | 7.845  | 8.920  | 11.861 | 9.026  | 0.742 |  |
| 1 | 4 | 425.5  | 1698.9 | 33.1 | 2.867  | 7.108  | 2.739  | 1.122  | 2.999  | 2.380  | 0.016  | 2.615  | 2.549  | 2.636  | 2.703  | 0.571 |  |
| 0 | 2 | 1137.1 | 2273.2 | 74.2 | 0.014  | 0.071  | 0.014  | 0.011  | 0.015  | 1.190  | 0.016  | 2.615  | 0.013  | 2.636  | 0.659  | 0.347 |  |
| 0 | 2 | 476.2  | 951.4  | 20.2 | 1.433  | 0.071  | 1.370  | 1.122  | 1.500  | 1.190  | 0.016  | 0.013  | 0.013  | 1.318  | 0.805  | 0.214 |  |
| 0 | 2 | 411.7  | 822.4  | 15.6 | 0.014  | 7.108  | 1.370  | 1.122  | 0.015  | 1.190  | 0.016  | 1.307  | 1.274  | 1.318  | 1.473  | 0.653 |  |
| 0 | 3 | 993.8  | 2979.4 | 59.2 | 0.014  | 0.071  | 0.014  | 0.011  | 0.015  | 1.190  | 0.016  | 1.307  | 1.274  | 1.318  | 0.523  | 0.204 |  |
| 0 | 2 | 461.7  | 922.4  | 27.1 | 1.433  | 0.071  | 1.370  | 1.122  | 1.500  | 1.190  | 0.016  | 0.013  | 1.274  | 1.318  | 0.931  | 0.199 |  |
| 0 | 3 | 640.7  | 1920.0 | 64.0 | 1.433  | 0.071  | 0.014  | 1.122  | 1.500  | 2.380  | 0.016  | 2.615  | 5.097  | 6.589  | 2.084  | 0.700 |  |
| 0 | 3 | 1041.5 | 3122.4 | 47.0 | 0.014  | 0.071  | 0.014  | 1.122  | 0.015  | 0.012  | 0.016  | 0.013  | 0.013  | 1.318  | 0.261  | 0.161 |  |
| 0 | 3 | 428.6  | 1283.7 | 45.8 | 0.014  | 0.071  | 1.370  | 0.011  | 0.015  | 1.190  | 0.016  | 0.013  | 0.013  | 0.013  | 0.273  | 0.169 |  |
| 0 | 3 | 542.2  | 1624.7 | 14.0 | 4.300  | 14.215 | 4.109  | 8.976  | 4.499  | 2.380  | 3.137  | 2.615  | 2.549  | 2.636  | 4.942  | 1.201 |  |
| 0 | 2 | 585.8  | 1170.6 | 24.9 | 0.014  | 0.071  | 0.014  | 0.011  | 0.015  | 1.190  | 0.016  | 0.013  | 0.013  | 1.318  | 0.267  | 0.165 |  |
| 1 | 5 | 799.6  | 3993.7 | 54.0 | 0.014  | 0.071  | 0.014  | 0.011  | 0.015  | 1.190  | 0.016  | 1.307  | 0.013  | 1.318  | 0.397  | 0.191 |  |
| 0 | 3 | 794.7  | 2382.2 | 36.6 | 14.335 | 14.215 | 15.066 | 24.685 | 23.994 | 16.662 | 25.094 | 14.382 | 24.211 | 19.768 | 19.241 | 1.522 |  |
| 0 | 3 | 579.6  | 1736.9 | 58.9 | 11.468 | 35.539 | 16.436 | 10.098 | 14.996 | 10.711 | 12.547 | 7.845  | 7.646  | 7.907  | 13.519 | 2.621 |  |
| 0 | 2 | 611.8  | 1222.5 | 20.5 | 1.433  | 14.215 | 1.370  | 1.122  | 2.999  | 2.380  | 0.016  | 2.615  | 2.549  | 2.636  | 3.134  | 1.265 |  |
| 0 | 3 | 599.0  | 1794.8 | 28.1 | 0.014  | 0.071  | 0.014  | 0.011  | 1.500  | 2.380  | 0.016  | 0.013  | 0.013  | 0.013  | 0.404  | 0.264 |  |
| 0 | 3 | 900.8  | 2700.4 | 79.5 | 0.014  | 0.071  | 0.014  | 0.011  | 0.015  | 1.190  | 0.016  | 0.013  | 1.274  | 0.013  | 0.263  | 0.162 |  |
| 0 | 2 | 736.9  | 1472.8 | 38.9 | 0.014  | 0.071  | 0.014  | 0.011  | 0.015  | 1.190  | 0.016  | 0.013  | 1.274  | 0.013  | 0.263  | 0.162 |  |
| 0 | 2 | 926.5  | 1851.9 | 65.6 | 1.433  | 0.071  | 0.014  | 0.011  | 0.015  | 1.190  | 0.016  | 0.013  | 3.823  | 2.636  | 0.922  | 0.429 |  |
| 0 | 4 | 593.0  | 2369.1 | 30.4 | 0.014  | 0.071  | 1.370  | 1.122  | 0.015  | 1.190  | 0.016  | 0.013  | 0.013  | 0.013  | 0.384  | 0.185 |  |
| 0 | 2 | 745.8  | 1490.7 | 47.5 | 1.433  | 7.108  | 2.739  | 4.488  | 4.499  | 2.380  | 4.705  | 2.615  | 2.549  | 3.954  | 3.647  | 0.519 |  |
| 0 | 2 | 667.8  | 1334.6 | 28.6 | 1.433  | 0.071  | 1.370  | 1.122  | 1.500  | 0.012  | 1.568  | 1.307  | 1.274  | 1.318  | 1.098  | 0.180 |  |
| 0 | 3 | 907.8  | 2721.3 | 70.3 | 0.014  | 0.071  | 0.014  | 0.011  | 0.015  | 3.570  | 0.016  | 1.307  | 1.274  | 1.318  | 0.761  | 0.366 |  |
| 0 | 3 | 757.4  | 2270.2 | 57.1 | 0.014  | 0.071  | 0.014  | 0.011  | 0.015  | 3.570  | 0.016  | 0.013  | 2.549  | 0.013  | 0.629  | 0.412 |  |
| 0 | 2 | 632.8  | 1264.6 | 29.7 | 0.014  | 0.071  | 0.014  | 0.011  | 0.015  | 2.380  | 1.568  | 1.307  | 3.823  | 1.318  | 1.052  | 0.410 |  |
| 0 | 2 | 525.3  | 1049.5 | 25.5 | 2.867  | 0.071  | 2.739  | 1.122  | 1.500  | 2.380  | 1.568  | 1.307  | 1.274  | 1.318  | 1.615  | 0.266 |  |
| 0 | 2 | 467.2  | 933.5  | 23.1 | 1.433  | 0.071  | 1.370  | 2.244  | 1.500  | 0.012  | 1.568  | 0.013  | 1.274  | 0.013  | 0.950  | 0.264 |  |
| 0 | 3 | 952.1  | 2854.3 | 69.8 | 1.433  | 0.071  | 0.014  | 1.122  | 0.015  | 0.012  | 1.568  | 1.307  | 0.013  | 1.318  | 0.687  | 0.224 |  |
| 0 | 2 | 832.4  | 1663.9 | 47.9 | 1.433  | 0.071  | 1.370  | 0.011  | 1.500  | 1.190  | 1.568  | 1.307  | 1.274  | 3.954  | 1.368  | 0.339 |  |
| 0 | 2 | 656.8  | 1312.5 | 24.4 | 1.433  | 0.071  | 1.370  | 1.122  | 1.500  | 0.012  | 1.568  | 1.307  | 1.274  | 1.318  | 1.098  | 0.180 |  |
| 0 | 3 | 459.6  | 1376.7 | 22.9 | 1.433  | 0.071  | 2.739  | 2.244  | 2.999  | 2.380  | 1.568  | 2.615  | 2.549  | 2.636  | 2.124  | 0.277 |  |
| 0 | 3 | 1020.2 | 3058.5 | 76.0 | 17.201 | 0.071  | 5.479  | 20.197 | 11.997 | 41.656 | 21.957 | 23.534 | 17.840 | 25.039 | 18.497 | 3.610 |  |
| 0 | 2 | 644.3  | 1287.7 | 35.5 | 1.433  | 0.071  | 2.739  | 1.122  | 1.500  | 1.190  | 1.568  | 1.307  | 1.274  | 1.318  | 1.352  | 0.204 |  |
| 0 | 3 | 874.8  | 2622.3 | 83.1 | 0.014  | 0.071  | 0.014  | 1.122  | 0.015  | 4.761  | 0.016  | 13.075 | 0.013  | 1.318  | 2.042  | 1.312 |  |
| 1 | 4 | 724.9  | 2896.4 | 73.3 | 8.601  | 7.108  | 10.957 | 12.343 | 5.998  | 10.711 | 3.137  | 13.075 | 11.468 | 10.543 | 9.394  | 0.992 |  |

12 Supplemental Digital Content 2.xlsx

|        |        |        |        |        |        |        |        |        |        |        |       |       |  |
|--------|--------|--------|--------|--------|--------|--------|--------|--------|--------|--------|-------|-------|--|
| 5.000  | 5.659  | 6.127  | 4.663  | 7.276  | 7.895  | 8.314  | 7.507  | 9.765  | 5.524  | 6.773  | 0.518 | 0.546 |  |
| 1.000  | 3.772  | 0.015  | 4.663  | 1.213  | 6.579  | 2.771  | 1.501  | 2.790  | 4.143  | 2.845  | 0.630 | 0.549 |  |
| 6.000  | 11.317 | 10.722 | 12.824 | 9.702  | 14.474 | 8.314  | 18.017 | 15.345 | 16.573 | 12.329 | 1.206 | 0.554 |  |
| 3.000  | 0.019  | 0.015  | 2.332  | 1.213  | 1.316  | 0.014  | 0.015  | 1.395  | 0.014  | 0.933  | 0.348 | 0.555 |  |
| 8.000  | 13.203 | 12.254 | 9.326  | 7.276  | 7.895  | 11.085 | 10.510 | 8.370  | 9.668  | 9.759  | 0.626 | 0.558 |  |
| 3.000  | 5.659  | 15.318 | 9.326  | 6.064  | 6.579  | 9.699  | 7.507  | 8.370  | 11.049 | 8.257  | 1.072 | 0.563 |  |
| 2.000  | 3.772  | 3.064  | 2.332  | 2.425  | 2.632  | 1.386  | 0.015  | 2.790  | 2.762  | 2.318  | 0.324 | 0.565 |  |
| 2.000  | 0.019  | 0.015  | 2.332  | 0.012  | 6.579  | 0.014  | 0.015  | 0.014  | 0.014  | 1.101  | 0.672 | 0.566 |  |
| 1.000  | 0.019  | 1.532  | 1.166  | 1.213  | 1.316  | 0.014  | 0.015  | 0.014  | 0.014  | 0.630  | 0.209 | 0.567 |  |
| 1.000  | 0.019  | 1.532  | 2.332  | 0.012  | 1.316  | 2.771  | 1.501  | 0.014  | 0.014  | 1.051  | 0.323 | 0.570 |  |
| 0.010  | 1.886  | 0.015  | 1.166  | 1.213  | 1.316  | 0.014  | 0.015  | 0.014  | 1.381  | 0.703  | 0.238 | 0.573 |  |
| 1.000  | 1.886  | 0.015  | 1.166  | 1.213  | 1.316  | 0.014  | 1.501  | 1.395  | 1.381  | 1.089  | 0.194 | 0.576 |  |
| 1.000  | 3.772  | 1.532  | 4.663  | 1.213  | 3.948  | 1.386  | 0.015  | 4.185  | 4.143  | 2.586  | 0.539 | 0.577 |  |
| 0.010  | 0.019  | 0.015  | 0.012  | 0.012  | 1.316  | 0.014  | 0.015  | 0.014  | 0.014  | 0.144  | 0.130 | 0.579 |  |
| 0.010  | 0.019  | 0.015  | 0.012  | 0.012  | 0.013  | 0.014  | 0.015  | 0.014  | 1.381  | 0.151  | 0.137 | 0.581 |  |
| 0.010  | 3.772  | 7.659  | 2.332  | 2.425  | 5.263  | 4.157  | 1.501  | 4.185  | 9.668  | 4.097  | 0.910 | 0.582 |  |
| 0.010  | 0.019  | 0.015  | 0.012  | 0.012  | 0.013  | 0.014  | 0.015  | 0.014  | 1.381  | 0.151  | 0.137 | 0.592 |  |
| 0.010  | 0.019  | 0.015  | 1.166  | 0.012  | 1.316  | 0.014  | 0.015  | 0.014  | 0.014  | 0.259  | 0.164 | 0.592 |  |
| 26.000 | 33.951 | 21.445 | 17.487 | 20.617 | 10.527 | 24.941 | 16.516 | 18.135 | 16.573 | 20.619 | 2.047 | 0.596 |  |
| 9.000  | 11.317 | 16.849 | 8.161  | 10.915 | 13.158 | 13.856 | 13.513 | 13.950 | 9.668  | 12.039 | 0.851 | 0.598 |  |
| 2.000  | 3.772  | 1.532  | 3.497  | 2.425  | 2.632  | 1.386  | 3.003  | 1.395  | 2.762  | 2.440  | 0.270 | 0.599 |  |
| 0.010  | 1.886  | 3.064  | 0.012  | 0.012  | 1.316  | 0.014  | 0.015  | 0.014  | 0.014  | 0.636  | 0.344 | 0.601 |  |
| 0.010  | 0.019  | 0.015  | 0.012  | 0.012  | 0.013  | 0.014  | 0.015  | 0.014  | 1.381  | 0.151  | 0.137 | 0.601 |  |
| 0.010  | 0.019  | 0.015  | 0.012  | 0.012  | 0.013  | 0.014  | 0.015  | 0.014  | 1.381  | 0.151  | 0.137 | 0.601 |  |
| 0.010  | 0.019  | 0.015  | 1.166  | 1.213  | 2.632  | 0.014  | 0.015  | 0.014  | 1.381  | 0.648  | 0.288 | 0.602 |  |
| 2.000  | 0.019  | 0.015  | 1.166  | 2.425  | 0.013  | 0.014  | 0.015  | 0.014  | 0.014  | 0.570  | 0.298 | 0.603 |  |
| 3.000  | 5.659  | 7.659  | 3.497  | 3.638  | 2.632  | 2.771  | 3.003  | 4.185  | 4.143  | 4.019  | 0.494 | 0.610 |  |
| 1.000  | 1.886  | 3.064  | 0.012  | 1.213  | 1.316  | 1.386  | 0.015  | 1.395  | 1.381  | 1.267  | 0.276 | 0.615 |  |
| 0.010  | 0.019  | 0.015  | 3.497  | 0.012  | 0.013  | 1.386  | 0.015  | 0.014  | 0.014  | 0.500  | 0.360 | 0.616 |  |
| 0.010  | 0.019  | 0.015  | 1.166  | 0.012  | 1.316  | 0.014  | 0.015  | 1.395  | 0.014  | 0.398  | 0.196 | 0.619 |  |
| 0.010  | 0.019  | 0.015  | 1.166  | 0.012  | 1.316  | 1.386  | 1.501  | 1.395  | 1.381  | 0.820  | 0.221 | 0.624 |  |
| 2.000  | 1.886  | 1.532  | 1.166  | 1.213  | 1.316  | 1.386  | 1.501  | 1.395  | 1.381  | 1.478  | 0.086 | 0.629 |  |
| 1.000  | 0.019  | 1.532  | 1.166  | 2.425  | 0.013  | 2.771  | 0.015  | 0.014  | 2.762  | 1.172  | 0.368 | 0.630 |  |
| 3.000  | 0.019  | 1.532  | 0.012  | 0.012  | 1.316  | 1.386  | 1.501  | 0.014  | 0.014  | 0.881  | 0.325 | 0.630 |  |
| 1.000  | 3.772  | 1.532  | 1.166  | 1.213  | 1.316  | 1.386  | 1.501  | 1.395  | 1.381  | 1.566  | 0.250 | 0.643 |  |
| 1.000  | 1.886  | 1.532  | 0.012  | 2.425  | 1.316  | 1.386  | 0.015  | 1.395  | 1.381  | 1.235  | 0.237 | 0.650 |  |
| 2.000  | 3.772  | 3.064  | 1.166  | 2.425  | 2.632  | 1.386  | 0.015  | 1.395  | 1.381  | 1.924  | 0.342 | 0.655 |  |
| 30.000 | 9.431  | 6.127  | 30.311 | 21.829 | 23.685 | 19.399 | 12.011 | 23.715 | 29.003 | 20.551 | 2.756 | 0.656 |  |
| 1.000  | 0.019  | 1.532  | 2.332  | 0.012  | 1.316  | 0.014  | 1.501  | 1.395  | 2.762  | 1.188  | 0.302 | 0.658 |  |
| 0.010  | 0.019  | 0.015  | 8.161  | 0.012  | 0.013  | 8.314  | 0.015  | 1.395  | 11.049 | 2.900  | 1.397 | 0.660 |  |
| 11.000 | 7.545  | 4.595  | 10.492 | 7.276  | 9.211  | 5.543  | 16.516 | 6.975  | 8.287  | 8.744  | 1.071 | 0.661 |  |

## 12 Supplemental Digital Content 2.xlsx

|     |           |                                                      |                                    |                                                                                                            |      |
|-----|-----------|------------------------------------------------------|------------------------------------|------------------------------------------------------------------------------------------------------------|------|
| 282 | 14550407  | complement C2                                        | LGSYPVGGnVSFEcEDGFILR              | N9(Deamidated); C14(Carbamidomethyl)                                                                       | 3.99 |
| 283 | 530397208 | plasma protease C1 inhibitor                         | dTFVnASR                           | N-Term(Carbamyl); N5(Deamidated)                                                                           | 2.43 |
| 284 | 4503635   | prothrombin                                          | GHVnITR                            | N4(Deamidated)                                                                                             | 2.41 |
| 285 | 4502067   | protein AMBP                                         | YFYnGTSmAcETFQYGGcmGnGNNFVTEK      | N4(Deamidated); M8(Oxidation); C10(Carbamidomethyl); C18(Carbamidomethyl); M19(Oxidation); N21(Deamidated) | 3.32 |
| 286 | 105990535 | coagulation factor V                                 | NSVLnSSTAETHSSPYSEDPIEDPLOPDVTGIR  | N5(Deamidated)                                                                                             | 4.40 |
| 287 | 66347875  | complement C1r subcomponent                          | EHEAQSnASLDVFLGHTNVEELmK           | N7(Deamidated); M23(Oxidation)                                                                             | 5.90 |
| 288 | 355594753 | clusterin                                            | KEDALnETR                          | N6(Deamidated)                                                                                             | 3.69 |
| 289 | 178557739 | complement C4-B                                      | FSDGLESnSSTQFEVKK                  | N8(Deamidated)                                                                                             | 3.43 |
| 290 | 116534898 | desmoglein-2                                         | DTGELnVTSILDR                      | N6(Deamidated)                                                                                             | 3.67 |
| 291 | 21264357  | mannan-binding lectin serine protease 1              | NnLTTYK                            | N2(Deamidated)                                                                                             | 2.26 |
| 292 | 31377806  | polymeric immunoglobulin receptor                    | AnLNTFPEnGFVVNIAQLSODDSGR          | N2(Deamidated); N9(Deamidated)                                                                             | 5.38 |
| 293 | 530375183 | serotransferrin                                      | QQQHLFGSnVTDcSGNFcLFR              | N9(Deamidated); C13(Carbamidomethyl); C18(Carbamidomethyl)                                                 | 5.62 |
| 294 | 5031863   | galectin-3-binding protein                           | GLnLTEDTYKPR                       | N3(Deamidated)                                                                                             | 3.76 |
| 295 | 62739186  | complement factor H                                  | IPcSQPPQIEHGThSSR                  | C3(Carbamidomethyl); N15(Deamidated)                                                                       | 4.70 |
| 296 | 4502511   | complement component C9                              | nETYQLFLSYSSK                      | N1(Deamidated)                                                                                             | 2.30 |
| 297 | 530370065 | fibronectin                                          | GGNSnGALcHFPFLYNNHnYTDcTSEGR       | N5(Deamidated); C9(Carbamidomethyl); N19(Deamidated); C23(Carbamidomethyl)                                 | 6.44 |
| 298 | 530410335 | asialoglycoprotein receptor 2                        | EAFSnFSSSTLTEVOAISTHGGSVGDK        | N5(Deamidated)                                                                                             | 5.17 |
| 299 | 4502163   | apolipoprotein D                                     | ciQAnYSLmEnGK                      | C1(Carbamidomethyl); N5(Deamidated); M9(Oxidation); N11(Deamidated)                                        | 3.02 |
| 300 | 530403990 | kallistatin                                          | DFYVDEnTTVR                        | N7(Deamidated)                                                                                             | 2.53 |
| 301 | 45269141  | multimerin-1                                         | DTEEnLHVLnQTLAEVLFPMDNK            | N5(Deamidated); N10(Deamidated); M20(Oxidation)                                                            | 2.45 |
| 302 | 67782358  | complement factor B                                  | SPYYnVSDEISFHcYDGYTLR              | N5(Deamidated); C14(Carbamidomethyl)                                                                       | 5.09 |
| 303 | 23111005  | microfibril-associated glycoprotein 4                | VDLEDFEnNTAYAK                     | N8(Deamidated)                                                                                             | 3.57 |
| 304 | 66932947  | alpha-2-macroglobulin                                | GNEANYSnATTDEHGLVQFSInTTNVmGTSLTVR | N9(Deamidated); N23(Deamidated); M28(Oxidation)                                                            | 4.82 |
| 305 | 530403048 | alpha-1-antichymotrypsin                             | NVIFSPLSISTALAFSLGAHnTTLTEILK      | N22(Deamidated)                                                                                            | 7.97 |
| 306 | 70906437  | fibrinogen gamma chain                               | DLOSLEDILHOVENK                    | N14(Deamidated)                                                                                            | 4.70 |
| 307 | 4504893   | kininogen-1                                          | ITYSIVQnTncSK                      | N9(Deamidated); C10(Carbamidomethyl)                                                                       | 3.54 |
| 308 | 29171717  | phosphatidylinositol-glycan-specific phospholipase D | NInYTER                            | N3(Deamidated)                                                                                             | 1.95 |
| 309 | 24308201  | adipocyte plasma membrane-associated protein         | AGPnGTLFVADAYK                     | N4(Deamidated)                                                                                             | 3.32 |
| 310 | 7705753   | complement C1q subcomponent subunit A                | RNPpMGGNVVIFDVTITNOEOPYQnHSGR      | M5(Oxidation); N25(Deamidated)                                                                             | 7.82 |
| 311 | 4502163   | apolipoprotein D                                     | ADGTVNQIEGEATPVnLTEPAKLEVK         | N16(Deamidated)                                                                                            | 5.87 |
| 312 | 14550407  | complement C2                                        | TmFPnLTDVR                         | M2(Oxidation); N5(Deamidated)                                                                              | 2.85 |
| 313 | 4505047   | lumican                                              | LSHNELADSGIPGNSFnVSSLVELDLSYNK     | N17(Deamidated)                                                                                            | 5.89 |
| 314 | 4557485   | ceruloplasmin                                        | ELHHLQEQnVSNAFLDKGEFYIGSK          | N9(Deamidated)                                                                                             | 8.29 |
| 315 | 530417477 | IgGfC-binding protein                                | LLISSLESASPVSILSQADnTSK            | N21(Deamidated)                                                                                            | 5.29 |
| 316 | 31377806  | polymeric immunoglobulin receptor                    | LSLLEEPGnGTFTVILNQLTSR             | N9(Deamidated)                                                                                             | 5.14 |
| 317 | 530422423 | lysosome-associated membrane glycoprotein 2          | LnSSTIK                            | N2(Deamidated)                                                                                             | 1.76 |
| 318 | 530422423 | lysosome-associated membrane glycoprotein 2          | VASVININPnTTHSTGScR                | N10(Deamidated); C18(Carbamidomethyl)                                                                      | 3.89 |
| 319 | 300244535 | interleukin-6 receptor subunit beta                  | VKPNPPHnLSVINSEELSSILK             | N8(Deamidated)                                                                                             | 5.00 |
| 320 | 530425806 | major prion protein                                  | GENFTETDVK                         | N3(Deamidated)                                                                                             | 2.81 |
| 321 | 205277441 | thyroxine-binding globulin                           | VTAcHSSQPnATLYK                    | C4(Carbamidomethyl); N10(Deamidated)                                                                       | 3.93 |

12 Supplemental Digital Content 2.xlsx

|   |   |        |        |      |        |        |        |        |        |        |        |        |        |        |        |       |  |
|---|---|--------|--------|------|--------|--------|--------|--------|--------|--------|--------|--------|--------|--------|--------|-------|--|
| 0 | 2 | 1159.0 | 2317.1 | 64.4 | 0.014  | 0.071  | 2.739  | 1.122  | 0.015  | 2.380  | 1.568  | 1.307  | 1.274  | 2.636  | 1.313  | 0.332 |  |
| 0 | 2 | 477.2  | 953.4  | 33.8 | 14.335 | 14.215 | 13.697 | 12.343 | 10.497 | 11.902 | 14.115 | 10.460 | 14.017 | 11.861 | 12.744 | 0.483 |  |
| 0 | 2 | 399.2  | 797.4  | 15.0 | 2.867  | 7.108  | 4.109  | 2.244  | 5.998  | 2.380  | 4.705  | 3.922  | 5.097  | 2.636  | 4.107  | 0.518 |  |
| 0 | 3 | 1127.8 | 3381.3 | 56.4 | 0.014  | 0.071  | 0.014  | 2.244  | 0.015  | 0.012  | 0.016  | 1.307  | 0.013  | 1.318  | 0.502  | 0.257 |  |
| 0 | 3 | 1152.5 | 3455.6 | 56.8 | 1.433  | 0.071  | 1.370  | 1.122  | 1.500  | 1.190  | 1.568  | 0.013  | 1.274  | 0.013  | 0.955  | 0.206 |  |
| 0 | 4 | 679.6  | 2715.3 | 51.5 | 0.014  | 0.071  | 0.014  | 0.011  | 0.015  | 3.570  | 0.016  | 1.307  | 3.823  | 0.013  | 0.885  | 0.486 |  |
| 1 | 3 | 359.5  | 1076.5 | 15.5 | 2.867  | 0.071  | 2.739  | 3.366  | 4.499  | 1.190  | 4.705  | 3.922  | 3.823  | 2.636  | 2.982  | 0.458 |  |
| 1 | 3 | 635.3  | 1903.9 | 35.6 | 0.014  | 0.071  | 0.014  | 1.122  | 0.015  | 0.012  | 0.016  | 1.307  | 0.013  | 1.318  | 0.390  | 0.188 |  |
| 0 | 2 | 717.4  | 1433.7 | 60.0 | 0.014  | 0.071  | 0.014  | 0.011  | 1.500  | 0.012  | 1.568  | 0.013  | 0.013  | 1.318  | 0.453  | 0.221 |  |
| 0 | 2 | 427.7  | 854.4  | 19.7 | 0.014  | 0.071  | 0.014  | 1.122  | 2.999  | 0.012  | 0.016  | 0.013  | 2.549  | 0.013  | 0.682  | 0.367 |  |
| 0 | 3 | 937.1  | 2809.3 | 73.1 | 1.433  | 0.071  | 1.370  | 1.122  | 1.500  | 3.570  | 1.568  | 0.013  | 3.823  | 2.636  | 1.711  | 0.408 |  |
| 0 | 4 | 629.8  | 2516.1 | 56.2 | 12.901 | 0.071  | 13.697 | 16.831 | 13.497 | 8.331  | 10.979 | 10.460 | 12.743 | 6.589  | 10.610 | 1.487 |  |
| 0 | 3 | 469.9  | 1407.7 | 34.1 | 2.867  | 7.108  | 1.370  | 1.122  | 1.500  | 1.190  | 0.016  | 1.307  | 1.274  | 1.318  | 1.907  | 0.617 |  |
| 0 | 3 | 674.7  | 2022.0 | 30.1 | 7.167  | 21.323 | 6.848  | 4.488  | 5.998  | 5.951  | 4.705  | 5.230  | 5.097  | 3.954  | 7.076  | 1.615 |  |
| 0 | 2 | 790.9  | 1580.7 | 60.4 | 0.014  | 0.071  | 1.370  | 0.011  | 0.015  | 0.012  | 0.016  | 0.013  | 1.274  | 1.318  | 0.411  | 0.199 |  |
| 0 | 4 | 801.8  | 3204.3 | 50.6 | 2.867  | 0.071  | 2.739  | 11.220 | 7.498  | 3.570  | 0.016  | 5.230  | 2.549  | 1.318  | 3.708  | 1.099 |  |
| 0 | 3 | 919.8  | 2757.3 | 60.0 | 1.433  | 0.071  | 1.370  | 0.011  | 1.500  | 1.190  | 0.016  | 1.307  | 1.274  | 1.318  | 0.949  | 0.202 |  |
| 0 | 2 | 773.3  | 1545.7 | 32.8 | 7.167  | 0.071  | 4.109  | 5.610  | 8.998  | 4.761  | 6.274  | 2.615  | 3.823  | 6.589  | 5.002  | 0.799 |  |
| 0 | 2 | 680.3  | 1359.6 | 40.7 | 1.433  | 0.071  | 0.014  | 1.122  | 2.999  | 0.012  | 0.016  | 0.013  | 0.013  | 0.013  | 0.571  | 0.317 |  |
| 0 | 3 | 896.8  | 2688.3 | 81.9 | 0.014  | 0.071  | 0.014  | 0.011  | 0.015  | 0.012  | 0.016  | 1.307  | 0.013  | 0.013  | 0.149  | 0.129 |  |
| 0 | 4 | 647.5  | 2587.1 | 57.7 | 5.734  | 0.071  | 13.697 | 11.220 | 4.499  | 10.711 | 3.137  | 10.460 | 7.646  | 6.589  | 7.376  | 1.326 |  |
| 0 | 2 | 815.4  | 1629.7 | 49.6 | 1.433  | 0.071  | 1.370  | 0.011  | 0.015  | 0.012  | 0.016  | 0.013  | 0.013  | 0.013  | 0.297  | 0.184 |  |
| 0 | 3 | 1274.9 | 3822.7 | 63.6 | 8.601  | 0.071  | 4.109  | 20.197 | 26.993 | 24.993 | 26.663 | 19.612 | 22.937 | 18.450 | 17.263 | 3.044 |  |
| 0 | 4 | 793.9  | 3172.8 | 96.6 | 1.433  | 0.071  | 0.014  | 4.488  | 1.500  | 13.092 | 10.979 | 6.537  | 3.823  | 2.636  | 4.457  | 1.422 |  |
| 0 | 2 | 891.5  | 1781.9 | 74.9 | 63.072 | 14.215 | 21.914 | 48.248 | 55.486 | 76.170 | 58.030 | 82.370 | 50.971 | 83.024 | 55.350 | 7.360 |  |
| 0 | 2 | 707.8  | 1414.7 | 34.3 | 2.867  | 21.323 | 5.479  | 3.366  | 4.499  | 3.570  | 1.568  | 2.615  | 3.823  | 3.954  | 5.306  | 1.811 |  |
| 0 | 2 | 455.7  | 910.4  | 19.8 | 1.433  | 0.071  | 1.370  | 1.122  | 0.015  | 0.012  | 0.016  | 0.013  | 0.013  | 0.013  | 0.408  | 0.198 |  |
| 0 | 2 | 712.9  | 1424.7 | 46.9 | 0.014  | 0.071  | 0.014  | 1.122  | 1.500  | 0.012  | 0.016  | 1.307  | 0.013  | 1.318  | 0.539  | 0.212 |  |
| 1 | 4 | 822.4  | 3286.5 | 47.4 | 7.167  | 7.108  | 4.109  | 3.366  | 5.998  | 4.761  | 10.979 | 7.845  | 10.194 | 9.225  | 7.075  | 0.811 |  |
| 1 | 3 | 908.8  | 2724.4 | 52.0 | 1.433  | 0.071  | 0.014  | 2.244  | 5.998  | 1.190  | 3.137  | 2.615  | 3.823  | 2.636  | 2.316  | 0.569 |  |
| 0 | 2 | 605.8  | 1210.6 | 45.9 | 1.433  | 0.071  | 1.370  | 3.366  | 1.500  | 2.380  | 3.137  | 2.615  | 1.274  | 3.954  | 2.110  | 0.374 |  |
| 0 | 3 | 1074.2 | 3220.6 | 70.2 | 15.768 | 0.071  | 0.014  | 7.854  | 4.499  | 7.141  | 10.979 | 7.845  | 8.920  | 10.543 | 7.363  | 1.535 |  |
| 1 | 5 | 581.7  | 2904.4 | 49.3 | 10.034 | 0.071  | 9.588  | 6.732  | 8.998  | 7.141  | 6.274  | 11.767 | 12.743 | 6.589  | 7.994  | 1.128 |  |
| 0 | 3 | 816.8  | 2448.3 | 63.5 | 2.867  | 0.071  | 0.014  | 1.122  | 1.500  | 0.012  | 3.137  | 1.307  | 3.823  | 3.954  | 1.781  | 0.492 |  |
| 0 | 3 | 801.8  | 2403.3 | 83.3 | 4.300  | 0.071  | 0.014  | 2.244  | 1.500  | 9.521  | 3.137  | 2.615  | 6.371  | 2.636  | 3.241  | 0.917 |  |
| 0 | 2 | 382.2  | 763.4  | 16.9 | 1.433  | 0.071  | 1.370  | 0.011  | 0.015  | 0.012  | 0.016  | 0.013  | 0.013  | 0.013  | 0.297  | 0.184 |  |
| 0 | 3 | 677.0  | 2029.0 | 32.9 | 1.433  | 0.071  | 1.370  | 0.011  | 0.015  | 0.012  | 0.016  | 0.013  | 1.274  | 1.318  | 0.553  | 0.217 |  |
| 0 | 4 | 604.8  | 2416.3 | 53.0 | 1.433  | 0.071  | 0.014  | 2.244  | 2.999  | 3.570  | 0.016  | 0.013  | 1.274  | 1.318  | 1.295  | 0.414 |  |
| 0 | 2 | 570.8  | 1140.5 | 25.1 | 0.014  | 0.071  | 0.014  | 0.011  | 1.500  | 0.012  | 0.016  | 1.307  | 1.274  | 1.318  | 0.554  | 0.218 |  |
| 0 | 3 | 559.9  | 1677.8 | 21.5 | 2.867  | 0.071  | 1.370  | 2.244  | 2.999  | 2.380  | 3.137  | 1.307  | 2.549  | 2.636  | 2.156  | 0.304 |  |



## 12 Supplemental Digital Content 2.xlsx

|        |        |        |        |        |        |        |        |        |        |        |       |       |  |
|--------|--------|--------|--------|--------|--------|--------|--------|--------|--------|--------|-------|-------|--|
| 2.000  | 0.019  | 0.015  | 2.332  | 1.213  | 0.013  | 1.386  | 1.501  | 1.395  | 1.381  | 1.125  | 0.264 | 0.664 |  |
| 10.000 | 18.862 | 13.786 | 10.492 | 9.702  | 10.527 | 12.471 | 12.011 | 9.765  | 15.192 | 12.281 | 0.935 | 0.665 |  |
| 3.000  | 3.772  | 4.595  | 2.332  | 3.638  | 3.948  | 4.157  | 6.006  | 2.790  | 4.143  | 3.838  | 0.326 | 0.666 |  |
| 1.000  | 0.019  | 0.015  | 1.166  | 0.012  | 0.013  | 0.014  | 0.015  | 0.014  | 1.381  | 0.365  | 0.181 | 0.667 |  |
| 1.000  | 1.886  | 0.015  | 1.166  | 0.012  | 1.316  | 1.386  | 0.015  | 1.395  | 0.014  | 0.820  | 0.231 | 0.667 |  |
| 0.010  | 0.019  | 0.015  | 0.012  | 0.012  | 0.013  | 0.014  | 0.015  | 0.014  | 5.524  | 0.565  | 0.551 | 0.668 |  |
| 4.000  | 3.772  | 3.064  | 2.332  | 2.425  | 2.632  | 4.157  | 1.501  | 4.185  | 4.143  | 3.221  | 0.304 | 0.669 |  |
| 0.010  | 0.019  | 0.015  | 1.166  | 0.012  | 0.013  | 0.014  | 1.501  | 0.014  | 0.014  | 0.278  | 0.178 | 0.669 |  |
| 0.010  | 1.886  | 0.015  | 0.012  | 1.213  | 0.013  | 0.014  | 0.015  | 1.395  | 1.381  | 0.595  | 0.244 | 0.671 |  |
| 1.000  | 3.772  | 3.064  | 0.012  | 0.012  | 0.013  | 0.014  | 0.015  | 0.014  | 1.381  | 0.930  | 0.446 | 0.673 |  |
| 2.000  | 1.886  | 0.015  | 2.332  | 3.638  | 1.316  | 0.014  | 1.501  | 4.185  | 2.762  | 1.965  | 0.431 | 0.673 |  |
| 10.000 | 3.772  | 7.659  | 13.990 | 9.702  | 7.895  | 15.242 | 12.011 | 9.765  | 8.287  | 9.832  | 1.048 | 0.674 |  |
| 1.000  | 1.886  | 0.015  | 1.166  | 2.425  | 3.948  | 1.386  | 1.501  | 1.395  | 1.381  | 1.610  | 0.325 | 0.675 |  |
| 6.000  | 7.545  | 6.127  | 4.663  | 6.064  | 6.579  | 8.314  | 6.006  | 6.975  | 5.524  | 6.380  | 0.327 | 0.678 |  |
| 0.010  | 0.019  | 1.532  | 0.012  | 0.012  | 1.316  | 0.014  | 0.015  | 0.014  | 0.014  | 0.296  | 0.189 | 0.678 |  |
| 5.000  | 0.019  | 0.015  | 4.663  | 6.064  | 3.948  | 9.699  | 1.501  | 4.185  | 8.287  | 4.338  | 1.019 | 0.679 |  |
| 0.010  | 0.019  | 1.532  | 1.166  | 0.012  | 1.316  | 1.386  | 0.015  | 1.395  | 1.381  | 0.823  | 0.222 | 0.680 |  |
| 4.000  | 5.659  | 3.064  | 4.663  | 4.851  | 1.316  | 5.543  | 4.504  | 6.975  | 5.524  | 4.610  | 0.495 | 0.682 |  |
| 2.000  | 0.019  | 1.532  | 0.012  | 1.213  | 0.013  | 2.771  | 0.015  | 0.014  | 0.014  | 0.760  | 0.329 | 0.683 |  |
| 1.000  | 0.019  | 0.015  | 1.166  | 0.012  | 0.013  | 0.014  | 0.015  | 0.014  | 0.014  | 0.228  | 0.143 | 0.684 |  |
| 5.000  | 3.772  | 1.532  | 12.824 | 7.276  | 3.948  | 6.928  | 6.006  | 8.370  | 11.049 | 6.670  | 1.084 | 0.685 |  |
| 0.010  | 0.019  | 0.015  | 0.012  | 1.213  | 0.013  | 0.014  | 0.015  | 1.395  | 1.381  | 0.409  | 0.202 | 0.687 |  |
| 22.000 | 13.203 | 3.064  | 12.824 | 27.893 | 11.843 | 20.785 | 16.516 | 40.455 | 22.097 | 19.068 | 3.239 | 0.689 |  |
| 7.000  | 3.772  | 0.015  | 8.161  | 4.851  | 6.579  | 5.543  | 3.003  | 2.790  | 9.668  | 5.138  | 0.904 | 0.691 |  |
| 49.000 | 47.154 | 26.040 | 55.958 | 59.425 | 82.898 | 67.896 | 69.065 | 59.985 | 71.816 | 58.924 | 5.003 | 0.693 |  |
| 6.000  | 7.545  | 3.064  | 4.663  | 4.851  | 2.632  | 4.157  | 3.003  | 4.185  | 5.524  | 4.562  | 0.479 | 0.696 |  |
| 1.000  | 0.019  | 1.532  | 0.012  | 1.213  | 0.013  | 1.386  | 0.015  | 0.014  | 0.014  | 0.522  | 0.211 | 0.699 |  |
| 0.010  | 0.019  | 1.532  | 0.012  | 1.213  | 0.013  | 1.386  | 0.015  | 0.014  | 0.014  | 0.423  | 0.210 | 0.702 |  |
| 5.000  | 11.317 | 4.595  | 8.161  | 10.915 | 9.211  | 8.314  | 1.501  | 6.975  | 9.668  | 7.566  | 0.977 | 0.704 |  |
| 1.000  | 1.886  | 1.532  | 2.332  | 2.425  | 2.632  | 4.157  | 1.501  | 4.185  | 4.143  | 2.579  | 0.378 | 0.704 |  |
| 2.000  | 1.886  | 1.532  | 2.332  | 2.425  | 2.632  | 2.771  | 1.501  | 2.790  | 2.762  | 2.263  | 0.159 | 0.711 |  |
| 9.000  | 3.772  | 0.015  | 8.161  | 10.915 | 7.895  | 13.856 | 3.003  | 13.950 | 11.049 | 8.162  | 1.471 | 0.712 |  |
| 1.000  | 3.772  | 12.254 | 10.492 | 9.702  | 6.579  | 4.157  | 3.003  | 6.975  | 15.192 | 7.313  | 1.429 | 0.713 |  |
| 1.000  | 3.772  | 0.015  | 1.166  | 1.213  | 2.632  | 2.771  | 0.015  | 0.014  | 2.762  | 1.536  | 0.431 | 0.713 |  |
| 3.000  | 5.659  | 0.015  | 3.497  | 2.425  | 1.316  | 4.157  | 1.501  | 4.185  | 2.762  | 2.852  | 0.519 | 0.716 |  |
| 0.010  | 1.886  | 0.015  | 0.012  | 0.012  | 0.013  | 0.014  | 0.015  | 0.014  | 0.014  | 0.201  | 0.187 | 0.719 |  |
| 0.010  | 0.019  | 0.015  | 0.012  | 0.012  | 0.013  | 1.386  | 0.015  | 0.014  | 2.762  | 0.426  | 0.293 | 0.731 |  |
| 2.000  | 3.772  | 0.015  | 1.166  | 2.425  | 0.013  | 1.386  | 0.015  | 2.790  | 1.381  | 1.496  | 0.404 | 0.732 |  |
| 0.010  | 1.886  | 0.015  | 1.166  | 0.012  | 1.316  | 0.014  | 0.015  | 0.014  | 0.014  | 0.446  | 0.228 | 0.737 |  |
| 1.000  | 1.886  | 1.532  | 2.332  | 2.425  | 2.632  | 2.771  | 0.015  | 2.790  | 2.762  | 2.015  | 0.292 | 0.741 |  |

## 12 Supplemental Digital Content 2.xlsx

|     |           |                                                |                                 |                                                                          |      |
|-----|-----------|------------------------------------------------|---------------------------------|--------------------------------------------------------------------------|------|
| 322 | 4503689   | fibrinogen alpha chain                         | mDGSLNFnR                       | M1(Oxidation); N8(Deamidated)                                            | 2.88 |
| 323 | 166795301 | prenylcysteine oxidase 1                       | mSnITFLNFDPPIEEFHQYYOHIVTTLVK   | M1(Oxidation); N3(Deamidated)                                            | 5.39 |
| 324 | 530398815 | complement C1s                                 | NcGvncSGDVFTALIGEIASPNYPKYPENSr | C2(Carbamidomethyl); N5(Deamidated); C6(Carbamidomethyl)                 | 7.21 |
| 325 | 530377645 | complement factor I                            | FLNnGTcTAEgK                    | N4(Deamidated); C7(Carbamidomethyl)                                      | 3.17 |
| 326 | 110611237 | coagulation factor XIII B chain                | EHETcLAPELYnGnYSTTQK            | C5(Carbamidomethyl); N12(Deamidated); N14(Deamidated)                    | 4.01 |
| 327 | 530377669 | plasma kallikrein                              | IYSGILnLSDITKDPFSQIK            | N7(Deamidated)                                                           | 3.76 |
| 328 | 205277383 | hepatocyte growth factor-like protein          | GTGnDTVLNVALLNVISNQEcnIK        | N4(Deamidated); C21(Carbamidomethyl)                                     | 5.50 |
| 329 | 73858564  | corticosteroid-binding globulin                | AVLQLNEEGVDTAGSTGVTLnLTSKPIILR  | N21(Deamidated)                                                          | 6.79 |
| 330 | 14550407  | complement C2                                  | QSVPAHFVALnGSK                  | N11(Deamidated)                                                          | 3.60 |
| 331 | 4507725   | transferrin                                    | ALGISPFHEHAeVFTAnDSGPRR         | N18(Deamidated)                                                          | 3.28 |
| 332 | 530375762 | carboxypeptidase N subunit 2                   | LEDLEVTGSSFLnLSTNIFSnLTSLGK     | N13(Deamidated); N21(Deamidated)                                         | 4.06 |
| 333 | 530397208 | plasma protease C1 inhibitor                   | mLFVEPILEVSSLPTTnSTTNSATK       | M1(Oxidation); N17(Deamidated)                                           | 2.48 |
| 334 | 4506115   | vitamin K-dependent protein C                  | EVFVHPnYSK                      | N7(Deamidated)                                                           | 2.17 |
| 335 | 530370065 | fibronectin                                    | HEEGHmLncTcFGQGR                | M6(Oxidation); N8(Deamidated); C9(Carbamidomethyl); C11(Carbamidomethyl) | 4.47 |
| 336 | 56788359  | ADAMTS-like protein 4                          | LVSGnLTDRe                      | N5(Deamidated)                                                           | 2.07 |
| 337 | 4503635   | prothrombin                                    | YPHKPEInSTTHPGADLOENFcR         | N8(Deamidated); C22(Carbamidomethyl)                                     | 5.10 |
| 338 | 66347875  | complement C1r subcomponent                    | mLLTFHTDFSnEEnGTImFYK           | M1(Oxidation); N11(Deamidated); N14(Deamidated); M18(Oxidation)          | 4.10 |
| 339 | 4505047   | lumican                                        | LHINHnLTESVGPLPK                | N7(Deamidated)                                                           | 4.81 |
| 340 | 73858566  | heparin cofactor 2                             | nLSmPLLPA DFHK                  | N1(Deamidated); M4(Oxidation)                                            | 3.51 |
| 341 | 530403048 | alpha-1-antichymotrypsin                       | YTGnASALFILPDODK                | N4(Deamidated)                                                           | 3.83 |
| 342 | 4504383   | hepatocyte growth factor activator             | DSVSVVLGQHFFnR                  | N13(Deamidated)                                                          | 4.81 |
| 343 | 4502511   | complement component C9                        | AVnITSENLI DDVSLIR              | N3(Deamidated)                                                           | 5.54 |
| 344 | 530397771 | hypoxia up-regulated protein 1                 | LSALDNLnHSSmFLK                 | N9(Deamidated); M13(Oxidation)                                           | 3.70 |
| 345 | 4502161   | apolipoprotein C-IV                            | ELLETVVnR                       | N8(Deamidated)                                                           | 2.60 |
| 346 | 530407092 | aminopeptidase N                               | KLnYTL SQGHR                    | N3(Deamidated)                                                           | 2.22 |
| 347 | 355594753 | clusterin                                      | LAnLTOGEDOYYLR                  | N3(Deamidated)                                                           | 3.75 |
| 348 | 513126885 | carboxypeptidase B2                            | QVHFFVnASDVDNVK                 | N7(Deamidated)                                                           | 4.54 |
| 349 | 4502511   | complement component C9                        | FSYSKnETyQLFLSYSSK              | N6(Deamidated)                                                           | 4.21 |
| 350 | 156523970 | alpha-2-HS-glycoprotein                        | AALAAFNAQNnGSNFQLEeISR          | N11(Deamidated)                                                          | 6.32 |
| 351 | 530376359 | ADP-ribosyl cyclase 2                          | DSSGVIHVmLnGSEPTGAYPIK          | M9(Oxidation); N11(Deamidated)                                           | 2.24 |
| 352 | 27477039  | ICOS ligand                                    | TVVTYHIPQnSSLENVDSR             | N10(Deamidated)                                                          | 2.15 |
| 353 | 148728160 | receptor-type tyrosine-protein phosphatase eta | IHVAGETDSSNLnVSEPR              | N13(Deamidated)                                                          | 2.91 |
| 354 | 530395269 | hemopexin                                      | GHGHRnGTGHGnSTHHGPEYmR          | N6(Deamidated); N12(Deamidated); M21(Oxidation)                          | 5.13 |
| 355 | 7705753   | complement C1q subcomponent subunit A          | NPPmGGNVVIFDVTITNOEePYQnHSGR    | M4(Oxidation); N24(Deamidated)                                           | 6.60 |
| 356 | 166362713 | cadherin-5                                     | LDREnISEYHLTAVIVDK              | N5(Deamidated)                                                           | 4.41 |
| 357 | 189163530 | alpha-1-antitrypsin                            | YLGnATAIFFLPDEGKLOHLENELTHDIITK | N4(Deamidated)                                                           | 8.25 |
| 358 | 261878614 | inter-alpha-trypsin inhibitor heavy chain H1   | DKIcDLLVANNHF AHFFAPQnLTmNk     | C4(Carbamidomethyl); N21(Deamidated); M25(Oxidation)                     | 6.81 |
| 359 | 116534898 | desmoglein-2                                   | InATDADEPNLNSK                  | N2(Deamidated)                                                           | 1.97 |
| 360 | 70906437  | fibrinogen gamma chain                         | VDKDLQSL EDILHQVEnK             | N17(Deamidated)                                                          | 6.73 |
| 361 | 530407092 | aminopeptidase N                               | VPVTLALnNTLFLIEER               | N8(Deamidated)                                                           | 5.14 |
| 362 | 530397973 | cell adhesion molecule 1                       | VSLTnVSISDEGR                   | N5(Deamidated)                                                           | 3.97 |

12 Supplemental Digital Content 2.xlsx

|   |   |        |        |      |         |        |        |        |         |         |        |         |        |         |        |       |  |
|---|---|--------|--------|------|---------|--------|--------|--------|---------|---------|--------|---------|--------|---------|--------|-------|--|
| 0 | 2 | 535.7  | 1070.5 | 27.7 | 2.867   | 0.071  | 2.739  | 1.122  | 2.999   | 2.380   | 3.137  | 2.615   | 2.549  | 2.636   | 2.311  | 0.304 |  |
| 0 | 4 | 886.2  | 3541.7 | 83.1 | 0.014   | 0.071  | 0.014  | 0.011  | 0.015   | 1.190   | 0.016  | 0.013   | 0.013  | 0.013   | 0.137  | 0.117 |  |
| 0 | 4 | 882.7  | 3527.6 | 73.8 | 1.433   | 0.071  | 0.014  | 1.122  | 0.015   | 2.380   | 1.568  | 5.230   | 5.097  | 2.636   | 1.957  | 0.610 |  |
| 0 | 2 | 656.8  | 1312.6 | 23.8 | 4.300   | 0.071  | 4.109  | 4.488  | 2.999   | 3.570   | 6.274  | 3.922   | 5.097  | 3.954   | 3.878  | 0.508 |  |
| 0 | 3 | 786.3  | 2357.0 | 39.8 | 4.300   | 0.071  | 2.739  | 1.122  | 1.500   | 0.012   | 0.016  | 0.013   | 2.549  | 2.636   | 1.496  | 0.478 |  |
| 1 | 3 | 785.4  | 2354.3 | 72.2 | 1.433   | 0.071  | 0.014  | 0.011  | 1.500   | 0.012   | 0.016  | 0.013   | 0.013  | 0.013   | 0.310  | 0.193 |  |
| 0 | 3 | 863.1  | 2587.3 | 74.1 | 1.433   | 0.071  | 0.014  | 0.011  | 2.999   | 2.380   | 3.137  | 1.307   | 1.274  | 1.318   | 1.395  | 0.368 |  |
| 0 | 3 | 1037.6 | 3110.7 | 64.3 | 4.300   | 0.071  | 1.370  | 8.976  | 4.499   | 3.570   | 12.547 | 9.152   | 7.646  | 3.954   | 5.609  | 1.223 |  |
| 0 | 3 | 485.9  | 1455.8 | 33.7 | 1.433   | 0.071  | 1.370  | 1.122  | 0.015   | 1.190   | 0.016  | 1.307   | 2.549  | 1.318   | 1.039  | 0.253 |  |
| 1 | 5 | 522.5  | 2608.3 | 41.1 | 0.014   | 0.071  | 0.014  | 0.011  | 1.500   | 0.012   | 0.016  | 0.013   | 0.013  | 0.013   | 0.168  | 0.148 |  |
| 0 | 3 | 967.8  | 2901.5 | 98.9 | 0.014   | 0.071  | 0.014  | 0.011  | 0.015   | 5.951   | 0.016  | 2.615   | 0.013  | 0.013   | 0.873  | 0.620 |  |
| 0 | 3 | 899.8  | 2697.4 | 66.4 | 1.433   | 0.071  | 0.014  | 0.011  | 0.015   | 1.190   | 0.016  | 0.013   | 0.013  | 0.013   | 0.279  | 0.173 |  |
| 0 | 3 | 407.5  | 1220.6 | 26.5 | 0.014   | 0.071  | 1.370  | 1.122  | 1.500   | 0.012   | 0.016  | 1.307   | 0.013  | 0.013   | 0.544  | 0.215 |  |
| 0 | 3 | 650.6  | 1949.8 | 22.5 | 5.734   | 0.071  | 2.739  | 3.366  | 4.499   | 2.380   | 1.568  | 3.922   | 0.013  | 1.318   | 2.561  | 0.593 |  |
| 0 | 2 | 488.3  | 975.5  | 25.0 | 0.014   | 0.071  | 0.014  | 0.011  | 0.015   | 0.012   | 0.016  | 0.013   | 1.274  | 1.318   | 0.276  | 0.170 |  |
| 0 | 4 | 678.8  | 2712.2 | 35.0 | 2.867   | 0.071  | 5.479  | 5.610  | 5.998   | 7.141   | 3.137  | 6.537   | 6.371  | 7.907   | 5.112  | 0.753 |  |
| 0 | 3 | 858.1  | 2572.2 | 60.0 | 2.867   | 0.071  | 0.014  | 1.122  | 0.015   | 3.570   | 1.568  | 5.230   | 3.823  | 2.636   | 2.092  | 0.576 |  |
| 0 | 3 | 628.7  | 1884.0 | 36.3 | 20.068  | 0.071  | 6.848  | 10.098 | 25.494  | 7.141   | 17.252 | 7.845   | 19.114 | 9.225   | 12.316 | 2.462 |  |
| 0 | 3 | 500.6  | 1499.8 | 46.6 | 1.433   | 0.071  | 1.370  | 0.011  | 1.500   | 1.190   | 0.016  | 0.013   | 0.013  | 0.013   | 0.563  | 0.222 |  |
| 0 | 3 | 585.3  | 1753.9 | 58.6 | 17.201  | 35.539 | 23.284 | 15.709 | 14.996  | 19.043  | 21.957 | 16.997  | 14.017 | 10.543  | 18.929 | 2.188 |  |
| 0 | 3 | 535.9  | 1605.8 | 54.4 | 2.867   | 0.071  | 1.370  | 2.244  | 2.999   | 0.012   | 1.568  | 1.307   | 1.274  | 0.013   | 1.373  | 0.351 |  |
| 0 | 2 | 986.5  | 1972.1 | 88.8 | 10.034  | 7.108  | 8.218  | 42.638 | 10.497  | 20.233  | 37.641 | 30.072  | 29.308 | 28.992  | 22.474 | 4.118 |  |
| 0 | 3 | 607.3  | 1819.9 | 63.3 | 2.867   | 0.071  | 0.014  | 0.011  | 0.015   | 1.190   | 0.016  | 0.013   | 1.274  | 0.013   | 0.548  | 0.303 |  |
| 0 | 2 | 537.3  | 1073.6 | 40.8 | 1.433   | 0.071  | 1.370  | 1.122  | 2.999   | 1.190   | 1.568  | 1.307   | 2.549  | 1.318   | 1.493  | 0.252 |  |
| 1 | 3 | 439.9  | 1317.7 | 19.9 | 0.014   | 0.071  | 1.370  | 0.011  | 0.015   | 0.012   | 0.016  | 0.013   | 0.013  | 0.013   | 0.155  | 0.135 |  |
| 0 | 2 | 842.9  | 1684.8 | 47.4 | 7.167   | 14.215 | 4.109  | 7.854  | 7.498   | 1.190   | 7.842  | 3.922   | 6.371  | 5.271   | 6.544  | 1.089 |  |
| 0 | 3 | 573.9  | 1719.8 | 44.0 | 1.433   | 0.071  | 1.370  | 2.244  | 1.500   | 1.190   | 1.568  | 2.615   | 1.274  | 1.318   | 1.458  | 0.212 |  |
| 1 | 3 | 731.7  | 2193.0 | 57.0 | 2.867   | 0.071  | 4.109  | 3.366  | 1.500   | 2.380   | 4.705  | 3.922   | 3.823  | 2.636   | 2.938  | 0.436 |  |
| 0 | 2 | 1183.6 | 2366.1 | 56.5 | 40.137  | 85.293 | 46.568 | 20.197 | 32.992  | 10.711  | 32.936 | 32.687  | 29.308 | 18.450  | 34.928 | 6.514 |  |
| 0 | 3 | 763.7  | 2289.1 | 49.3 | 0.014   | 0.071  | 0.014  | 0.011  | 0.015   | 0.012   | 0.016  | 0.013   | 1.274  | 0.013   | 0.145  | 0.126 |  |
| 0 | 3 | 720.7  | 2160.1 | 41.8 | 0.014   | 0.071  | 0.014  | 0.011  | 0.015   | 0.012   | 0.016  | 0.013   | 1.274  | 0.013   | 0.145  | 0.126 |  |
| 0 | 3 | 642.6  | 1925.9 | 31.8 | 0.014   | 0.071  | 1.370  | 0.011  | 0.015   | 0.012   | 0.016  | 0.013   | 0.013  | 0.013   | 0.155  | 0.135 |  |
| 1 | 6 | 403.2  | 2414.0 | 14.1 | 5.734   | 0.071  | 4.109  | 3.366  | 5.998   | 2.380   | 3.137  | 2.615   | 1.274  | 2.636   | 3.132  | 0.576 |  |
| 0 | 4 | 783.4  | 3130.5 | 54.5 | 8.601   | 7.108  | 2.739  | 4.488  | 4.499   | 8.331   | 9.410  | 6.537   | 10.194 | 9.225   | 7.113  | 0.790 |  |
| 1 | 4 | 529.8  | 2116.1 | 47.5 | 1.433   | 0.071  | 0.014  | 1.122  | 1.500   | 1.190   | 1.568  | 0.013   | 1.274  | 1.318   | 0.950  | 0.205 |  |
| 1 | 5 | 709.2  | 3541.8 | 79.5 | 2.867   | 0.071  | 1.370  | 16.831 | 2.999   | 10.711  | 12.547 | 18.305  | 11.468 | 15.814  | 9.298  | 2.177 |  |
| 1 | 4 | 798.1  | 3189.5 | 61.0 | 4.300   | 0.071  | 0.014  | 5.610  | 1.500   | 4.761   | 0.016  | 2.615   | 3.823  | 1.318   | 2.403  | 0.670 |  |
| 0 | 2 | 802.4  | 1603.7 | 28.0 | 0.014   | 0.071  | 0.014  | 0.011  | 0.015   | 0.012   | 0.016  | 0.013   | 0.013  | 1.318   | 0.150  | 0.130 |  |
| 1 | 3 | 708.7  | 2124.1 | 67.6 | 104.642 | 71.077 | 60.265 | 76.299 | 119.969 | 103.544 | 84.693 | 125.517 | 80.279 | 130.466 | 95.675 | 7.764 |  |
| 0 | 2 | 972.0  | 1943.1 | 77.3 | 2.867   | 0.071  | 0.014  | 1.122  | 1.500   | 3.570   | 0.016  | 1.307   | 2.549  | 2.636   | 1.565  | 0.410 |  |
| 0 | 2 | 689.3  | 1377.7 | 41.8 | 1.433   | 0.071  | 1.370  | 0.011  | 0.015   | 1.190   | 0.016  | 0.013   | 1.274  | 1.318   | 0.671  | 0.216 |  |

12 Supplemental Digital Content 2.xlsx

|        |        |        |        |        |         |         |         |        |         |        |       |       |  |
|--------|--------|--------|--------|--------|---------|---------|---------|--------|---------|--------|-------|-------|--|
| 2.000  | 1.886  | 3.064  | 2.332  | 2.425  | 2.632   | 1.386   | 3.003   | 2.790  | 2.762   | 2.428  | 0.170 | 0.742 |  |
| 2.000  | 0.019  | 0.015  | 0.012  | 0.012  | 0.013   | 0.014   | 0.015   | 0.014  | 0.014   | 0.213  | 0.199 | 0.746 |  |
| 4.000  | 0.019  | 0.015  | 2.332  | 2.425  | 3.948   | 1.386   | 1.501   | 1.395  | 0.014   | 1.703  | 0.471 | 0.746 |  |
| 4.000  | 5.659  | 3.064  | 3.497  | 3.638  | 3.948   | 4.157   | 3.003   | 4.185  | 5.524   | 4.067  | 0.286 | 0.749 |  |
| 3.000  | 1.886  | 0.015  | 1.166  | 2.425  | 0.013   | 4.157   | 1.501   | 1.395  | 1.381   | 1.694  | 0.401 | 0.754 |  |
| 1.000  | 0.019  | 0.015  | 0.012  | 1.213  | 0.013   | 0.014   | 0.015   | 0.014  | 0.014   | 0.233  | 0.146 | 0.755 |  |
| 2.000  | 0.019  | 0.015  | 1.166  | 2.425  | 2.632   | 1.386   | 0.015   | 1.395  | 1.381   | 1.243  | 0.307 | 0.756 |  |
| 9.000  | 3.772  | 1.532  | 8.161  | 4.851  | 6.579   | 8.314   | 4.504   | 5.580  | 8.287   | 6.058  | 0.769 | 0.759 |  |
| 1.000  | 0.019  | 1.532  | 1.166  | 1.213  | 1.316   | 0.014   | 0.015   | 1.395  | 4.143   | 1.181  | 0.381 | 0.760 |  |
| 1.000  | 0.019  | 0.015  | 0.012  | 0.012  | 0.013   | 0.014   | 0.015   | 0.014  | 0.014   | 0.113  | 0.099 | 0.761 |  |
| 5.000  | 0.019  | 0.015  | 1.166  | 0.012  | 0.013   | 0.014   | 0.015   | 0.014  | 0.014   | 0.628  | 0.499 | 0.762 |  |
| 0.010  | 1.886  | 0.015  | 0.012  | 0.012  | 0.013   | 0.014   | 0.015   | 0.014  | 0.014   | 0.201  | 0.187 | 0.762 |  |
| 2.000  | 0.019  | 0.015  | 1.166  | 1.213  | 0.013   | 0.014   | 0.015   | 0.014  | 0.014   | 0.448  | 0.231 | 0.766 |  |
| 2.000  | 1.886  | 0.015  | 3.497  | 3.638  | 2.632   | 4.157   | 3.003   | 2.790  | 4.143   | 2.776  | 0.396 | 0.766 |  |
| 0.010  | 1.886  | 0.015  | 0.012  | 0.012  | 0.013   | 0.014   | 0.015   | 0.014  | 0.014   | 0.201  | 0.187 | 0.769 |  |
| 5.000  | 1.886  | 0.015  | 5.829  | 6.064  | 6.579   | 6.928   | 6.006   | 2.790  | 6.905   | 4.800  | 0.758 | 0.774 |  |
| 3.000  | 0.019  | 0.015  | 1.166  | 3.638  | 2.632   | 2.771   | 1.501   | 2.790  | 1.381   | 1.891  | 0.400 | 0.778 |  |
| 5.000  | 22.634 | 10.722 | 8.161  | 12.127 | 17.106  | 22.170  | 7.507   | 13.950 | 12.430  | 13.181 | 1.880 | 0.783 |  |
| 1.000  | 0.019  | 0.015  | 0.012  | 1.213  | 1.316   | 1.386   | 1.501   | 0.014  | 0.014   | 0.649  | 0.215 | 0.784 |  |
| 11.000 | 15.089 | 24.508 | 18.653 | 14.553 | 23.685  | 8.314   | 31.530  | 12.555 | 20.716  | 18.060 | 2.257 | 0.786 |  |
| 1.000  | 1.886  | 1.532  | 1.166  | 1.213  | 0.013   | 2.771   | 0.015   | 2.790  | 0.014   | 1.240  | 0.330 | 0.786 |  |
| 21.000 | 7.545  | 9.191  | 24.482 | 21.829 | 34.212  | 22.170  | 21.020  | 30.690 | 19.335  | 21.147 | 2.594 | 0.788 |  |
| 1.000  | 0.019  | 0.015  | 1.166  | 0.012  | 1.316   | 1.386   | 1.501   | 0.014  | 0.014   | 0.644  | 0.214 | 0.799 |  |
| 2.000  | 0.019  | 1.532  | 1.166  | 2.425  | 1.316   | 1.386   | 1.501   | 1.395  | 1.381   | 1.412  | 0.195 | 0.803 |  |
| 1.000  | 0.019  | 0.015  | 0.012  | 0.012  | 0.013   | 0.014   | 0.015   | 0.014  | 0.014   | 0.113  | 0.099 | 0.805 |  |
| 7.000  | 9.431  | 6.127  | 3.497  | 7.276  | 7.895   | 8.314   | 1.501   | 5.580  | 5.524   | 6.215  | 0.744 | 0.806 |  |
| 2.000  | 0.019  | 1.532  | 1.166  | 1.213  | 1.316   | 4.157   | 1.501   | 0.014  | 2.762   | 1.568  | 0.387 | 0.807 |  |
| 1.000  | 1.886  | 4.595  | 3.497  | 3.638  | 5.263   | 2.771   | 1.501   | 1.395  | 5.524   | 3.107  | 0.524 | 0.807 |  |
| 20.000 | 45.268 | 88.843 | 16.321 | 27.893 | 13.158  | 44.340  | 19.518  | 23.715 | 26.241  | 32.530 | 7.130 | 0.807 |  |
| 0.010  | 1.886  | 0.015  | 0.012  | 0.012  | 0.013   | 0.014   | 0.015   | 0.014  | 0.014   | 0.201  | 0.187 | 0.810 |  |
| 0.010  | 1.886  | 0.015  | 0.012  | 0.012  | 0.013   | 0.014   | 0.015   | 0.014  | 0.014   | 0.201  | 0.187 | 0.810 |  |
| 2.000  | 0.019  | 0.015  | 0.012  | 0.012  | 0.013   | 0.014   | 0.015   | 0.014  | 0.014   | 0.213  | 0.199 | 0.812 |  |
| 3.000  | 1.886  | 4.595  | 3.497  | 4.851  | 3.948   | 5.543   | 3.003   | 2.790  | 0.014   | 3.313  | 0.503 | 0.816 |  |
| 3.000  | 9.431  | 4.595  | 6.995  | 9.702  | 2.632   | 12.471  | 6.006   | 8.370  | 11.049  | 7.425  | 1.062 | 0.816 |  |
| 0.010  | 1.886  | 0.015  | 1.166  | 0.012  | 0.013   | 1.386   | 1.501   | 1.395  | 1.381   | 0.877  | 0.242 | 0.818 |  |
| 8.000  | 1.886  | 0.015  | 6.995  | 9.702  | 10.527  | 6.928   | 13.513  | 11.160 | 17.954  | 8.668  | 1.659 | 0.820 |  |
| 3.000  | 0.019  | 0.015  | 5.829  | 3.638  | 1.316   | 5.543   | 0.015   | 5.580  | 1.381   | 2.634  | 0.763 | 0.823 |  |
| 1.000  | 0.019  | 0.015  | 0.012  | 0.012  | 0.013   | 0.014   | 0.015   | 0.014  | 0.014   | 0.113  | 0.099 | 0.824 |  |
| 81.000 | 43.382 | 58.207 | 75.777 | 98.233 | 126.321 | 108.080 | 135.128 | 97.651 | 106.344 | 93.012 | 9.100 | 0.826 |  |
| 2.000  | 1.886  | 0.015  | 2.332  | 2.425  | 2.632   | 0.014   | 0.015   | 2.790  | 2.762   | 1.687  | 0.376 | 0.829 |  |
| 0.010  | 1.886  | 0.015  | 0.012  | 0.012  | 1.316   | 1.386   | 0.015   | 1.395  | 1.381   | 0.743  | 0.248 | 0.830 |  |

## 12 Supplemental Digital Content 2.xlsx

|     |           |                                                         |                                      |                                                             |      |
|-----|-----------|---------------------------------------------------------|--------------------------------------|-------------------------------------------------------------|------|
| 363 | 530403048 | alpha-1-antichymotrypsin                                | APDKNVIFSPLSISTALAFSLGAHnTTLTEILK    | N26(Deamidated)                                             | 8.07 |
| 364 | 513126885 | carboxypeptidase B2                                     | KQVHFFVnASDVDNVK                     | N8(Deamidated)                                              | 4.48 |
| 365 | 384081581 | protein crumbs homolog 1                                | IDWNHITLENISSGSSLnVK                 | N18(Deamidated)                                             | 2.10 |
| 366 | 167466198 | intercellular adhesion molecule 1                       | AnLTVVLLR                            | N2(Deamidated)                                              | 3.17 |
| 367 | 21071039  | beta-Ala-His dipeptidase                                | LVPHmnVSAVEK                         | M5(Oxidation); N6(Deamidated)                               | 2.86 |
| 368 | 189458817 | transferrin receptor protein 1                          | KDFEDLYTPVnGSIVIVR                   | N11(Deamidated)                                             | 4.50 |
| 369 | 530403048 | alpha-1-antichymotrypsin                                | FnLTETSEAEIHQSFOHLLR                 | N2(Deamidated)                                              | 6.65 |
| 370 | 397140020 | ADAMTS-like protein 2-like                              | DFTLNETVnSIFAQGAPR                   | N9(Deamidated)                                              | 2.61 |
| 371 | 4505529   | alpha-1-acid glycoprotein 2                             | NEEYnKSVQEIQATFFYFTPrnKTEDTIFLR      | N5(Deamidated); N21(Deamidated)                             | 5.19 |
| 372 | 16418467  | leucine-rich alpha-2-glycoprotein                       | LPPGLLnFTLLR                         | N8(Deamidated)                                              | 4.49 |
| 373 | 4505047   | lumican                                                 | KLHINHnLnTESVGPLPK                   | N8(Deamidated)                                              | 5.93 |
| 374 | 530422423 | lysosome-associated membrane glycoprotein 2             | VQPFnVTQGK                           | N5(Deamidated)                                              | 2.39 |
| 375 | 40549451  | lymphatic vessel endothelial hyaluronic acid receptor 1 | KANQQLnFTEAK                         | N7(Deamidated)                                              | 3.52 |
| 376 | 66347875  | complement C1r subcomponent                             | cnYSIR                               | C1(Carbamidomethyl); N2(Deamidated)                         | 1.84 |
| 377 | 4504383   | hepatocyte growth factor activator                      | cFLGnGTGYR                           | C1(Carbamidomethyl); N5(Deamidated)                         | 2.17 |
| 378 | 19923106  | serum paraoxonase/arylesterase 1                        | VTQVYAEEnGTVLQGSTVASVYK              | N8(Deamidated)                                              | 5.41 |
| 379 | 530397208 | plasma protease C1 inhibitor                            | VGQLQLSHnLSLVLPQNLK                  | N9(Deamidated)                                              | 5.63 |
| 380 | 21489959  | immunoglobulin J chain                                  | EnISDPTSPLR                          | N2(Deamidated)                                              | 3.03 |
| 381 | 530426969 | lysosome-associated membrane glycoprotein 1             | GHTLTLnFTR                           | N7(Deamidated)                                              | 2.66 |
| 382 | 240255535 | collagen alpha-3(VI) chain                              | VAVVQHAPSESVnDnASmPPVK               | N14(Deamidated); M17(Oxidation)                             | 3.43 |
| 383 | 530366454 | C4b-binding protein alpha chain                         | FSLLGHASIScTVEnETIGVWRPSPPTcEK       | C11(Carbamidomethyl); N15(Deamidated); C28(Carbamidomethyl) | 7.01 |
| 384 | 105990532 | apolipoprotein B-100                                    | SSVITLNTNAELFnQSDIVAHLLSSSSVIDALQYK  | N14(Deamidated)                                             | 3.43 |
| 385 | 189163530 | alpha-1-antitrypsin                                     | YLGnATAIFFLPDEGK                     | N4(Deamidated)                                              | 4.03 |
| 386 | 4501987   | afamin                                                  | YAEDKFnETTEK                         | N7(Deamidated)                                              | 3.59 |
| 387 | 5453914   | phospholipid transfer protein                           | VSnVScOASVSR                         | N3(Deamidated); C6(Carbamidomethyl)                         | 3.59 |
| 388 | 29171717  | phosphatidylinositol-glycan-specific phospholipase D    | nLTTSLTESVDR                         | N1(Deamidated)                                              | 3.06 |
| 389 | 262206315 | L-selectin                                              | DnYTDLVAIQNK                         | N2(Deamidated)                                              | 3.56 |
| 390 | 61744483  | 4F2 cell-surface antigen heavy chain                    | LLIAGTnSSDLOQILSLLESNK               | N7(Deamidated)                                              | 3.43 |
| 391 | 21071030  | alpha-1B-glycoprotein                                   | FQSPAGTEALFELHnSVADSAAnYScVYVDLKPPFG | N15(Deamidated); N23(Deamidated); C26(Carbamidomethyl)      | 5.10 |
| 392 | 530396058 | CD59 glycoprotein                                       | TAVncSSDFDAcLITK                     | N4(Deamidated); C5(Carbamidomethyl); C12(Carbamidomethyl)   | 2.63 |
| 393 | 110611237 | coagulation factor XIII B chain                         | KEHETcLAPELYnGnYSTTQK                | C6(Carbamidomethyl); N13(Deamidated); N15(Deamidated)       | 5.07 |
| 394 | 73858566  | heparin cofactor 2                                      | DFVnASSK                             | N4(Deamidated)                                              | 1.93 |
| 395 | 355594753 | clusterin                                               | KKEDALnETR                           | N7(Deamidated)                                              | 3.83 |
| 396 | 21450863  | attractin                                               | GlcnSSDVR                            | C3(Carbamidomethyl); N4(Deamidated)                         | 2.44 |
| 397 | 530375762 | carboxypeptidase N subunit 2                            | LYLGSNnLTALHPALFOhLSK                | N7(Deamidated); N18(Deamidated)                             | 5.12 |
| 398 | 388240759 | zinc finger protein 267                                 | AFnRSScLTOHOTHTTGEK                  | N3(Deamidated); C7(Carbamidomethyl)                         | 2.15 |
| 399 | 262050538 | inter-alpha-trypsin inhibitor heavy chain H4            | HLQmDIHIFEPQGISFLETESTFmTNQLVDALTTWQ | M4(Oxidation); M24(Oxidation); N37(Deamidated)              | 6.26 |
| 400 | 116534900 | dopamine beta-hydroxylase                               | SLEAlnGSGLOmGLQR                     | N6(Deamidated); M12(Oxidation)                              | 3.06 |
| 401 | 4501987   | afamin                                                  | FnETTEK                              | N2(Deamidated)                                              | 2.14 |
| 402 | 66932947  | alpha-2-macroglobulin                                   | GcVLLSYLnETVTVSASLESVR               | C2(Carbamidomethyl); N9(Deamidated)                         | 5.17 |
| 403 | 27894328  | interleukin-1 receptor-like 1                           | NAnLTcSACFGK                         | N3(Deamidated); C6(Carbamidomethyl); C9(Carbamidomethyl)    | 2.78 |
| 404 | 133925809 | inter-alpha-trypsin inhibitor heavy chain H3            | KNAHGEEEnLTAR                        | N10(Deamidated)                                             | 2.58 |
| 405 | 105990532 | apolipoprotein B-100                                    | VNQNLYVESGSLnFSK                     | N13(Deamidated)                                             | 4.47 |

12 Supplemental Digital Content 2.xlsx

|   |   |        |        |      |         |         |         |         |         |         |         |         |         |         |         |       |  |
|---|---|--------|--------|------|---------|---------|---------|---------|---------|---------|---------|---------|---------|---------|---------|-------|--|
| 1 | 4 | 896.7  | 3584.0 | 90.4 | 0.014   | 0.071   | 0.014   | 1.122   | 0.015   | 2.380   | 1.568   | 1.307   | 0.013   | 0.013   | 0.652   | 0.276 |  |
| 1 | 4 | 462.7  | 1847.9 | 37.2 | 2.867   | 0.071   | 2.739   | 1.122   | 0.015   | 0.012   | 0.016   | 0.013   | 1.274   | 1.318   | 0.945   | 0.356 |  |
| 0 | 3 | 743.4  | 2228.1 | 51.3 | 0.014   | 0.071   | 0.014   | 0.011   | 0.015   | 0.012   | 1.568   | 0.013   | 0.013   | 0.013   | 0.174   | 0.155 |  |
| 0 | 2 | 500.3  | 999.6  | 51.8 | 1.433   | 0.071   | 1.370   | 0.011   | 0.015   | 1.190   | 0.016   | 0.013   | 1.274   | 1.318   | 0.671   | 0.216 |  |
| 0 | 3 | 447.6  | 1340.7 | 22.2 | 1.433   | 0.071   | 1.370   | 1.122   | 1.500   | 1.190   | 1.568   | 1.307   | 1.274   | 0.013   | 1.085   | 0.179 |  |
| 1 | 3 | 689.4  | 2066.1 | 58.3 | 0.014   | 0.071   | 0.014   | 1.122   | 0.015   | 0.012   | 0.016   | 0.013   | 0.013   | 0.013   | 0.130   | 0.110 |  |
| 0 | 4 | 601.1  | 2401.2 | 59.1 | 93.175  | 35.539  | 110.942 | 81.909  | 68.982  | 128.537 | 76.851  | 90.215  | 68.811  | 65.892  | 82.085  | 8.154 |  |
| 0 | 3 | 661.0  | 1981.0 | 72.6 | 1.433   | 0.071   | 0.014   | 0.011   | 0.015   | 0.012   | 0.016   | 0.013   | 0.013   | 0.013   | 0.161   | 0.141 |  |
| 2 | 4 | 919.4  | 3674.8 | 76.4 | 0.014   | 0.071   | 0.014   | 1.122   | 0.015   | 0.012   | 0.016   | 0.013   | 0.013   | 0.013   | 0.130   | 0.110 |  |
| 0 | 3 | 476.0  | 1425.8 | 73.1 | 15.768  | 0.071   | 6.848   | 4.488   | 13.497  | 7.141   | 7.842   | 3.922   | 6.371   | 7.907   | 7.386   | 1.427 |  |
| 1 | 4 | 503.8  | 2012.1 | 32.9 | 14.335  | 0.071   | 15.066  | 12.343  | 20.995  | 4.761   | 9.410   | 9.152   | 17.840  | 11.861  | 11.583  | 1.937 |  |
| 0 | 2 | 559.8  | 1118.6 | 32.2 | 0.014   | 0.071   | 0.014   | 1.122   | 1.500   | 0.012   | 1.568   | 0.013   | 1.274   | 1.318   | 0.691   | 0.225 |  |
| 1 | 2 | 696.9  | 1392.7 | 22.9 | 1.433   | 0.071   | 2.739   | 1.122   | 1.500   | 3.570   | 1.568   | 1.307   | 7.646   | 1.318   | 2.228   | 0.671 |  |
| 0 | 2 | 407.2  | 813.4  | 20.5 | 0.014   | 0.071   | 0.014   | 0.011   | 0.015   | 1.190   | 0.016   | 0.013   | 0.013   | 0.013   | 0.137   | 0.117 |  |
| 0 | 2 | 573.3  | 1145.5 | 34.1 | 1.433   | 0.071   | 0.014   | 0.011   | 0.015   | 0.012   | 0.016   | 0.013   | 1.274   | 0.013   | 0.287   | 0.178 |  |
| 0 | 3 | 772.4  | 2315.2 | 49.6 | 10.034  | 7.108   | 6.848   | 7.854   | 4.499   | 3.570   | 7.842   | 6.537   | 3.823   | 6.589   | 6.471   | 0.636 |  |
| 0 | 2 | 1157.7 | 2314.4 | 67.7 | 18.635  | 14.215  | 4.109   | 17.953  | 32.992  | 22.613  | 20.389  | 18.305  | 24.211  | 17.132  | 19.055  | 2.328 |  |
| 0 | 2 | 615.3  | 1229.6 | 34.7 | 2.867   | 14.215  | 4.109   | 1.122   | 2.999   | 2.380   | 1.568   | 2.615   | 2.549   | 2.636   | 3.706   | 1.195 |  |
| 0 | 3 | 387.5  | 1160.6 | 35.4 | 1.433   | 0.071   | 1.370   | 1.122   | 1.500   | 1.190   | 0.016   | 0.013   | 1.274   | 1.318   | 0.931   | 0.199 |  |
| 0 | 3 | 727.0  | 2179.1 | 30.2 | 0.014   | 0.071   | 1.370   | 1.122   | 1.500   | 0.012   | 0.016   | 1.307   | 2.549   | 1.318   | 0.928   | 0.273 |  |
| 0 | 4 | 844.2  | 3373.6 | 59.9 | 2.867   | 0.071   | 0.014   | 0.011   | 1.500   | 0.012   | 0.016   | 0.013   | 1.274   | 0.013   | 0.579   | 0.312 |  |
| 0 | 3 | 1289.3 | 3866.0 | 89.7 | 0.014   | 0.071   | 0.014   | 0.011   | 0.015   | 2.380   | 0.016   | 0.013   | 0.013   | 0.013   | 0.256   | 0.236 |  |
| 0 | 2 | 878.9  | 1756.9 | 84.8 | 114.677 | 149.263 | 167.097 | 134.646 | 146.963 | 139.249 | 144.292 | 124.209 | 133.799 | 142.327 | 139.652 | 4.533 |  |
| 1 | 2 | 738.3  | 1475.7 | 21.8 | 4.300   | 7.108   | 2.739   | 1.122   | 5.998   | 2.380   | 3.137   | 5.230   | 2.549   | 0.013   | 3.458   | 0.696 |  |
| 0 | 2 | 647.8  | 1294.6 | 18.5 | 1.433   | 0.071   | 1.370   | 1.122   | 1.500   | 2.380   | 1.568   | 2.615   | 2.549   | 2.636   | 1.724   | 0.261 |  |
| 0 | 2 | 668.8  | 1336.7 | 46.5 | 0.014   | 0.071   | 0.014   | 1.122   | 1.500   | 0.012   | 0.016   | 0.013   | 0.013   | 0.013   | 0.279   | 0.174 |  |
| 0 | 2 | 697.8  | 1394.7 | 47.1 | 1.433   | 0.071   | 1.370   | 1.122   | 1.500   | 0.012   | 0.016   | 1.307   | 1.274   | 1.318   | 0.942   | 0.201 |  |
| 0 | 3 | 786.8  | 2358.3 | 86.0 | 0.014   | 0.071   | 0.014   | 1.122   | 0.015   | 0.012   | 0.016   | 0.013   | 0.013   | 0.013   | 0.130   | 0.110 |  |
| 0 | 3 | 1544.1 | 4630.2 | 72.4 | 0.014   | 0.071   | 0.014   | 1.122   | 0.015   | 0.012   | 0.016   | 0.013   | 0.013   | 0.013   | 0.130   | 0.110 |  |
| 0 | 2 | 901.9  | 1802.8 | 46.1 | 0.014   | 0.071   | 0.014   | 0.011   | 0.015   | 0.012   | 0.016   | 0.013   | 0.013   | 1.318   | 0.150   | 0.130 |  |
| 1 | 4 | 622.0  | 2485.1 | 33.5 | 1.433   | 0.071   | 2.739   | 0.011   | 1.500   | 1.190   | 0.016   | 0.013   | 0.013   | 1.318   | 0.830   | 0.299 |  |
| 0 | 2 | 434.7  | 868.4  | 21.5 | 4.300   | 0.071   | 4.109   | 2.244   | 2.999   | 2.380   | 3.137   | 2.615   | 2.549   | 1.318   | 2.572   | 0.392 |  |
| 2 | 3 | 402.2  | 1204.6 | 14.6 | 4.300   | 7.108   | 4.109   | 5.610   | 4.499   | 3.570   | 6.274   | 6.537   | 7.646   | 3.954   | 5.361   | 0.462 |  |
| 0 | 2 | 504.7  | 1008.4 | 18.2 | 2.867   | 0.071   | 1.370   | 1.122   | 1.500   | 2.380   | 1.568   | 1.307   | 2.549   | 2.636   | 1.737   | 0.273 |  |
| 0 | 3 | 772.7  | 2316.2 | 64.5 | 17.201  | 0.071   | 8.218   | 11.220  | 13.497  | 11.902  | 15.684  | 15.690  | 14.017  | 18.450  | 12.595  | 1.686 |  |
| 1 | 3 | 735.3  | 2204.0 | 37.0 | 0.014   | 0.071   | 0.014   | 2.244   | 0.015   | 1.190   | 1.568   | 0.013   | 0.013   | 1.318   | 0.646   | 0.268 |  |
| 0 | 4 | 1124.8 | 4496.1 | 83.5 | 0.014   | 0.071   | 0.014   | 3.366   | 0.015   | 0.012   | 0.016   | 3.922   | 1.274   | 0.013   | 0.872   | 0.480 |  |
| 0 | 2 | 845.9  | 1690.8 | 43.9 | 0.014   | 0.071   | 1.370   | 0.011   | 0.015   | 0.012   | 0.016   | 1.307   | 0.013   | 0.013   | 0.284   | 0.176 |  |
| 0 | 2 | 435.2  | 869.4  | 15.6 | 1.433   | 0.071   | 0.014   | 1.122   | 0.015   | 0.012   | 0.016   | 0.013   | 0.013   | 0.013   | 0.272   | 0.169 |  |
| 0 | 2 | 1199.6 | 2398.2 | 81.4 | 7.167   | 0.071   | 1.370   | 20.197  | 7.498   | 20.233  | 17.252  | 10.460  | 12.743  | 7.907   | 10.490  | 2.257 |  |
| 0 | 2 | 672.3  | 1343.6 | 30.7 | 0.014   | 0.071   | 0.014   | 0.011   | 1.500   | 0.012   | 0.016   | 0.013   | 0.013   | 0.013   | 0.168   | 0.148 |  |
| 2 | 3 | 533.3  | 1597.8 | 14.4 | 0.014   | 0.071   | 0.014   | 0.011   | 0.015   | 0.012   | 0.016   | 1.307   | 0.013   | 0.013   | 0.149   | 0.129 |  |
| 0 | 2 | 900.4  | 1799.9 | 48.0 | 0.014   | 0.071   | 1.370   | 1.122   | 1.500   | 1.190   | 1.568   | 1.307   | 1.274   | 1.318   | 1.073   | 0.177 |  |

## 12 Supplemental Digital Content 2.xlsx

|        |         |         |         |         |         |         |         |         |         |         |        |       |  |
|--------|---------|---------|---------|---------|---------|---------|---------|---------|---------|---------|--------|-------|--|
| 1.000  | 0.019   | 0.015   | 2.332   | 0.012   | 2.632   | 0.014   | 0.015   | 0.014   | 1.381   | 0.743   | 0.329  | 0.834 |  |
| 1.000  | 0.019   | 1.532   | 1.166   | 1.213   | 2.632   | 0.014   | 0.015   | 1.395   | 1.381   | 1.037   | 0.263  | 0.838 |  |
| 0.010  | 0.019   | 0.015   | 0.012   | 1.213   | 0.013   | 0.014   | 0.015   | 0.014   | 0.014   | 0.134   | 0.120  | 0.838 |  |
| 0.010  | 1.886   | 1.532   | 1.166   | 0.012   | 0.013   | 0.014   | 0.015   | 0.014   | 1.381   | 0.604   | 0.248  | 0.841 |  |
| 1.000  | 0.019   | 0.015   | 1.166   | 2.425   | 1.316   | 1.386   | 1.501   | 1.395   | 0.014   | 1.024   | 0.250  | 0.844 |  |
| 0.010  | 0.019   | 1.532   | 0.012   | 0.012   | 0.013   | 0.014   | 0.015   | 0.014   | 0.014   | 0.165   | 0.152  | 0.854 |  |
| 59.000 | 28.293  | 93.438  | 123.575 | 47.297  | 97.372  | 51.269  | 117.111 | 85.095  | 95.295  | 79.774  | 10.015 | 0.860 |  |
| 0.010  | 0.019   | 0.015   | 1.166   | 0.012   | 0.013   | 0.014   | 0.015   | 0.014   | 0.014   | 0.129   | 0.115  | 0.863 |  |
| 0.010  | 0.019   | 0.015   | 0.012   | 0.012   | 0.013   | 0.014   | 1.501   | 0.014   | 0.014   | 0.162   | 0.149  | 0.864 |  |
| 5.000  | 7.545   | 9.191   | 8.161   | 6.064   | 9.211   | 6.928   | 9.009   | 6.975   | 8.287   | 7.637   | 0.445  | 0.868 |  |
| 6.000  | 20.748  | 15.318  | 12.824  | 10.915  | 6.579   | 13.856  | 7.507   | 6.975   | 11.049  | 11.177  | 1.482  | 0.870 |  |
| 0.010  | 1.886   | 1.532   | 0.012   | 1.213   | 0.013   | 1.386   | 0.015   | 0.014   | 1.381   | 0.746   | 0.250  | 0.871 |  |
| 1.000  | 3.772   | 1.532   | 2.332   | 2.425   | 3.948   | 2.771   | 1.501   | 2.790   | 1.381   | 2.345   | 0.318  | 0.876 |  |
| 1.000  | 0.019   | 0.015   | 0.012   | 0.012   | 0.013   | 0.014   | 0.015   | 0.014   | 0.014   | 0.113   | 0.099  | 0.876 |  |
| 1.000  | 0.019   | 0.015   | 0.012   | 0.012   | 0.013   | 1.386   | 0.015   | 0.014   | 0.014   | 0.250   | 0.160  | 0.878 |  |
| 7.000  | 7.545   | 4.595   | 1.166   | 15.766  | 2.632   | 9.699   | 6.006   | 8.370   | 4.143   | 6.692   | 1.306  | 0.880 |  |
| 28.000 | 18.862  | 4.595   | 20.984  | 16.978  | 25.001  | 20.785  | 22.521  | 16.740  | 20.716  | 19.518  | 1.982  | 0.881 |  |
| 2.000  | 3.772   | 3.064   | 4.663   | 3.638   | 2.632   | 2.771   | 1.501   | 4.185   | 6.905   | 3.513   | 0.486  | 0.883 |  |
| 1.000  | 0.019   | 0.015   | 1.166   | 2.425   | 0.013   | 1.386   | 0.015   | 1.395   | 1.381   | 0.882   | 0.263  | 0.883 |  |
| 0.010  | 1.886   | 0.015   | 1.166   | 1.213   | 1.316   | 1.386   | 0.015   | 1.395   | 1.381   | 0.978   | 0.219  | 0.887 |  |
| 1.000  | 0.019   | 0.015   | 0.012   | 1.213   | 1.316   | 0.014   | 0.015   | 2.790   | 0.014   | 0.641   | 0.296  | 0.888 |  |
| 2.000  | 0.019   | 0.015   | 0.012   | 0.012   | 0.013   | 0.014   | 0.015   | 0.014   | 0.014   | 0.213   | 0.199  | 0.890 |  |
| 89.000 | 181.072 | 166.963 | 139.896 | 123.700 | 130.268 | 135.792 | 150.142 | 119.971 | 147.776 | 138.458 | 8.120  | 0.899 |  |
| 4.000  | 5.659   | 4.595   | 0.012   | 4.851   | 2.632   | 4.157   | 1.501   | 2.790   | 5.524   | 3.572   | 0.576  | 0.901 |  |
| 1.000  | 1.886   | 1.532   | 2.332   | 2.425   | 1.316   | 1.386   | 3.003   | 1.395   | 1.381   | 1.766   | 0.199  | 0.902 |  |
| 1.000  | 0.019   | 0.015   | 0.012   | 0.012   | 0.013   | 1.386   | 0.015   | 0.014   | 0.014   | 0.250   | 0.160  | 0.904 |  |
| 0.010  | 1.886   | 0.015   | 1.166   | 1.213   | 1.316   | 1.386   | 0.015   | 1.395   | 1.381   | 0.978   | 0.219  | 0.905 |  |
| 1.000  | 0.019   | 0.015   | 0.012   | 0.012   | 0.013   | 0.014   | 0.015   | 0.014   | 0.014   | 0.113   | 0.099  | 0.907 |  |
| 1.000  | 0.019   | 0.015   | 0.012   | 0.012   | 0.013   | 0.014   | 0.015   | 0.014   | 0.014   | 0.113   | 0.099  | 0.907 |  |
| 0.010  | 0.019   | 0.015   | 1.166   | 0.012   | 0.013   | 0.014   | 0.015   | 0.014   | 0.014   | 0.129   | 0.115  | 0.907 |  |
| 1.000  | 0.019   | 0.015   | 2.332   | 1.213   | 0.013   | 1.386   | 0.015   | 1.395   | 1.381   | 0.877   | 0.258  | 0.908 |  |
| 1.000  | 1.886   | 4.595   | 1.166   | 3.638   | 1.316   | 2.771   | 4.504   | 2.790   | 1.381   | 2.505   | 0.434  | 0.909 |  |
| 3.000  | 5.659   | 4.595   | 4.663   | 6.064   | 6.579   | 6.928   | 3.003   | 6.975   | 6.905   | 5.437   | 0.491  | 0.911 |  |
| 1.000  | 1.886   | 1.532   | 1.166   | 2.425   | 1.316   | 2.771   | 1.501   | 1.395   | 2.762   | 1.775   | 0.207  | 0.912 |  |
| 15.000 | 7.545   | 3.064   | 15.155  | 12.127  | 13.158  | 15.242  | 16.516  | 15.345  | 15.192  | 12.834  | 1.355  | 0.913 |  |
| 2.000  | 0.019   | 0.015   | 0.012   | 2.425   | 0.013   | 0.014   | 1.501   | 0.014   | 0.014   | 0.603   | 0.307  | 0.917 |  |
| 3.000  | 0.019   | 0.015   | 2.332   | 0.012   | 1.316   | 1.386   | 0.015   | 0.014   | 0.014   | 0.812   | 0.357  | 0.922 |  |
| 0.010  | 0.019   | 0.015   | 0.012   | 2.425   | 0.013   | 0.014   | 0.015   | 0.014   | 0.014   | 0.255   | 0.241  | 0.923 |  |
| 1.000  | 0.019   | 0.015   | 0.012   | 0.012   | 0.013   | 1.386   | 0.015   | 0.014   | 0.014   | 0.250   | 0.160  | 0.925 |  |
| 16.000 | 15.089  | 0.015   | 4.663   | 21.829  | 5.263   | 9.699   | 7.507   | 18.135  | 9.668   | 10.787  | 2.157  | 0.925 |  |
| 0.010  | 0.019   | 0.015   | 0.012   | 0.012   | 0.013   | 0.014   | 0.015   | 0.014   | 1.381   | 0.151   | 0.137  | 0.933 |  |
| 0.010  | 0.019   | 1.532   | 0.012   | 0.012   | 0.013   | 0.014   | 0.015   | 0.014   | 0.014   | 0.165   | 0.152  | 0.934 |  |
| 1.000  | 1.886   | 0.015   | 1.166   | 1.213   | 0.013   | 1.386   | 1.501   | 1.395   | 1.381   | 1.096   | 0.195  | 0.934 |  |

## 12 Supplemental Digital Content 2.xlsx

|     |           |                                                  |                                 |                                                                                                                       |      |
|-----|-----------|--------------------------------------------------|---------------------------------|-----------------------------------------------------------------------------------------------------------------------|------|
| 406 | 14550407  | complement C2                                    | DHEnGTGTNTYAALNSVYLmmNNQmR      | N4(Deamidated); M20(Oxidation); M21(Oxidation); M25(Oxidation)                                                        | 6.08 |
| 407 | 153082722 | intercellular adhesion molecule 2                | AAPAPQEAATATFnSTADREDGHR        | N13(Deamidated)                                                                                                       | 3.33 |
| 408 | 530425159 | neutrophil elastase                              | GIASVLOELnVTVVTSLcR             | N10(Deamidated); C18(Carbamidomethyl)                                                                                 | 3.54 |
| 409 | 530425159 | neutrophil elastase                              | VVLGAHnLSR                      | N7(Deamidated)                                                                                                        | 2.84 |
| 410 | 105990532 | apolipoprotein B-100                             | FVEGSHnSTVSLTTK                 | N7(Deamidated)                                                                                                        | 3.95 |
| 411 | 153266841 | beta-2-glycoprotein 1                            | LGnWSAmPScK                     | N3(Deamidated); M7(Oxidation); C10(Carbamidomethyl)                                                                   | 2.76 |
| 412 | 88853069  | vitronectin                                      | nISDGFDFGIPDNVDAALALPAHSYSGR    | N1(Deamidated)                                                                                                        | 4.41 |
| 413 | 530403048 | alpha-1-antichymotrypsin                         | YTGnASALFILPDQDKmEEVEAmLLPETLK  | N4(Deamidated); M17(Oxidation); M23(Oxidation)                                                                        | 4.97 |
| 414 | 5730075   | fibroleukin                                      | VAnLTFVvNSLDGK                  | N3(Deamidated)                                                                                                        | 4.06 |
| 415 | 530384873 | up-regulator of cell proliferation               | cLLEnRnGLSnQnK                  | C1(Carbamidomethyl); N5(Deamidated); N8(Deamidated); N12(Deamidated); N14(Deamidated)                                 | 2.10 |
| 416 | 358438179 | neural cell adhesion molecule L1-like protein    | IIPSnNSGTFR                     | N5(Deamidated)                                                                                                        | 2.30 |
| 417 | 153792110 | protein HEG homolog 1                            | LNnSTGLQSSVSQTK                 | N3(Deamidated)                                                                                                        | 1.99 |
| 418 | 89191868  | von Willebrand factor                            | HcDGnVSScGDHPSEGcFcPPDK         | C2(Carbamidomethyl); N5(Deamidated); C9(Carbamidomethyl); C17(Carbamidomethyl); C19(Carbamidomethyl)                  | 3.25 |
| 419 | 89191868  | von Willebrand factor                            | TTcnPcPLGYKEEnNTGEccGR          | C3(Carbamidomethyl); N4(Deamidated); C6(Carbamidomethyl); N14(Deamidated); C19(Carbamidomethyl); C20(Carbamidomethyl) | 2.09 |
| 420 | 530417477 | IgGfC-binding protein                            | VITVQVAnFTLR                    | N8(Deamidated)                                                                                                        | 3.61 |
| 421 | 663071008 | complement C1r subcomponent-like protein         | KnQSVnVFLGHTAIDEmLK             | N2(Deamidated); N6(Deamidated); M17(Oxidation)                                                                        | 4.03 |
| 422 | 530370065 | fibronectin                                      | LDAPTNLQFVnETDSTVLVR            | N11(Deamidated)                                                                                                       | 5.06 |
| 423 | 4826762   | haptoglobin                                      | VVLHPnYSQVDIGLIK                | N6(Deamidated)                                                                                                        | 5.35 |
| 424 | 4504893   | kininogen-1                                      | LNAENnATFYFK                    | N6(Deamidated)                                                                                                        | 3.61 |
| 425 | 530410335 | asialoglycoprotein receptor 2                    | FVAcQmELLHsnGSQR                | C4(Carbamidomethyl); M6(Oxidation); N12(Deamidated)                                                                   | 2.32 |
| 426 | 530397771 | hypoxia up-regulated protein 1                   | AEPPLnASASDQGEK                 | N6(Deamidated)                                                                                                        | 2.14 |
| 427 | 21450863  | attractin                                        | IDSTGnVTNELR                    | N6(Deamidated)                                                                                                        | 3.71 |
| 428 | 66932947  | alpha-2-macroglobulin                            | VSnQTLsLFFTVLQDVPVR             | N3(Deamidated)                                                                                                        | 5.29 |
| 429 | 6103600   | apolipoprotein                                   | WEYcnLTR                        | C4(Carbamidomethyl); N5(Deamidated)                                                                                   | 2.24 |
| 430 | 296080754 | fibrinogen beta chain                            | GTAGNALmDGASQLmGEnR             | M8(Oxidation); M15(Oxidation); N18(Deamidated)                                                                        | 4.19 |
| 431 | 40317626  | thrombospondin-1                                 | VVnSTTGPEHLR                    | N3(Deamidated)                                                                                                        | 3.69 |
| 432 | 530403048 | alpha-1-antichymotrypsin                         | YTGnASALFILPDQDKmEEVEAmLLPETLKR | N4(Deamidated); M17(Oxidation); M23(Oxidation)                                                                        | 4.55 |
| 433 | 67782358  | complement factor B                              | KIVLDPSGSmNIYLVLDGSDSIGASnFTGAK | M10(Oxidation); N26(Deamidated)                                                                                       | 6.67 |
| 434 | 31377806  | polymeric immunoglobulin receptor                | VPGnVTAVLGETLK                  | N4(Deamidated)                                                                                                        | 4.21 |
| 435 | 530403048 | alpha-1-antichymotrypsin                         | KLINDYVKnGTR                    | N9(Deamidated)                                                                                                        | 2.89 |
| 436 | 530397208 | plasma protease C1 inhibitor                     | GVTSVSQIFHSPDLAIRDTFVnASR       | N22(Deamidated)                                                                                                       | 4.17 |
| 437 | 530403048 | alpha-1-antichymotrypsin                         | LINDYVKnGTR                     | N8(Deamidated)                                                                                                        | 2.14 |
| 438 | 530391083 | tenascin C                                       | LLETVEYnISGAER                  | N8(Deamidated)                                                                                                        | 3.31 |
| 439 | 21450863  | attractin                                        | EWLPLnR                         | N6(Deamidated)                                                                                                        | 1.81 |
| 440 | 66864913  | neuropilin-1                                     | RGPEcSQnYTPSGVIK                | C5(Carbamidomethyl); N8(Deamidated)                                                                                   | 2.70 |
| 441 | 38016947  | complement C5                                    | YnFSFR                          | N2(Deamidated)                                                                                                        | 1.78 |
| 442 | 530417477 | IgGfC-binding protein                            | KVTVRPGESVmVnISAK               | M11(Oxidation); N13(Deamidated)                                                                                       | 2.93 |
| 443 | 530397973 | cell adhesion molecule 1                         | FQLLnFSSSELK                    | N5(Deamidated)                                                                                                        | 2.90 |
| 444 | 530372918 | receptor-type tyrosine-protein phosphatase gamma | SDFSQTMlFQAnTTR                 | M7(Oxidation); N12(Deamidated)                                                                                        | 1.72 |
| 445 | 532691763 | adenosine deaminase CECR1                        | VQnVTEFDDSLLR                   | N3(Deamidated)                                                                                                        | 2.88 |



12 Supplemental Digital Content 2.xlsx

|   |   |        |        |      |        |         |         |        |         |        |        |        |        |        |        |        |  |
|---|---|--------|--------|------|--------|---------|---------|--------|---------|--------|--------|--------|--------|--------|--------|--------|--|
| 0 | 3 | 998.8  | 2994.3 | 47.6 | 0.014  | 0.071   | 0.014   | 1.122  | 1.500   | 0.012  | 0.016  | 1.307  | 0.013  | 1.318  | 0.539  | 0.212  |  |
| 1 | 4 | 604.3  | 2414.1 | 30.0 | 0.014  | 0.071   | 0.014   | 1.122  | 0.015   | 1.190  | 0.016  | 0.013  | 0.013  | 0.013  | 0.248  | 0.152  |  |
| 0 | 3 | 687.4  | 2060.1 | 87.1 | 0.014  | 0.071   | 0.014   | 0.011  | 0.015   | 1.190  | 0.016  | 0.013  | 0.013  | 0.013  | 0.137  | 0.117  |  |
| 0 | 3 | 356.2  | 1066.6 | 24.3 | 0.014  | 0.071   | 0.014   | 0.011  | 0.015   | 1.190  | 0.016  | 0.013  | 0.013  | 0.013  | 0.137  | 0.117  |  |
| 0 | 3 | 536.6  | 1607.8 | 26.4 | 4.300  | 0.071   | 2.739   | 3.366  | 2.999   | 7.141  | 4.705  | 3.922  | 3.823  | 7.907  | 4.097  | 0.700  |  |
| 0 | 2 | 634.3  | 1267.5 | 29.0 | 2.867  | 7.108   | 2.739   | 2.244  | 1.500   | 0.012  | 3.137  | 1.307  | 1.274  | 2.636  | 2.482  | 0.597  |  |
| 0 | 3 | 925.1  | 2773.3 | 67.3 | 1.433  | 0.071   | 0.014   | 1.122  | 1.500   | 1.190  | 3.137  | 1.307  | 1.274  | 1.318  | 1.237  | 0.271  |  |
| 1 | 4 | 850.7  | 3399.7 | 71.0 | 4.300  | 0.071   | 1.370   | 6.732  | 7.498   | 10.711 | 6.274  | 6.537  | 5.097  | 7.907  | 5.650  | 0.989  |  |
| 0 | 2 | 739.4  | 1477.8 | 61.8 | 1.433  | 0.071   | 0.014   | 0.011  | 1.500   | 1.190  | 0.016  | 0.013  | 1.274  | 1.318  | 0.684  | 0.221  |  |
| 1 | 2 | 888.9  | 1776.9 | 57.6 | 0.014  | 0.071   | 1.370   | 1.122  | 0.015   | 1.190  | 1.568  | 0.013  | 0.013  | 1.318  | 0.669  | 0.218  |  |
| 0 | 2 | 603.8  | 1206.6 | 28.9 | 1.433  | 0.071   | 1.370   | 1.122  | 1.500   | 1.190  | 1.568  | 1.307  | 1.274  | 0.013  | 1.085  | 0.179  |  |
| 0 | 2 | 826.4  | 1651.8 | 24.3 | 0.014  | 0.071   | 0.014   | 0.011  | 0.015   | 1.190  | 0.016  | 0.013  | 0.013  | 0.013  | 0.137  | 0.117  |  |
| 0 | 4 | 655.7  | 2620.0 | 26.4 | 0.014  | 0.071   | 0.014   | 0.011  | 0.015   | 1.190  | 0.016  | 0.013  | 0.013  | 0.013  | 0.137  | 0.117  |  |
| 1 | 3 | 873.7  | 2619.0 | 28.0 | 0.014  | 0.071   | 0.014   | 0.011  | 0.015   | 1.190  | 0.016  | 0.013  | 0.013  | 0.013  | 0.137  | 0.117  |  |
| 0 | 2 | 681.4  | 1361.8 | 56.5 | 1.433  | 0.071   | 0.014   | 1.122  | 1.500   | 1.190  | 1.568  | 0.013  | 3.823  | 3.954  | 1.469  | 0.449  |  |
| 1 | 4 | 541.3  | 2162.1 | 43.9 | 0.014  | 0.071   | 1.370   | 0.011  | 0.015   | 0.012  | 0.016  | 2.615  | 0.013  | 1.318  | 0.545  | 0.288  |  |
| 0 | 3 | 745.0  | 2233.1 | 61.3 | 12.901 | 7.108   | 10.957  | 19.075 | 10.497  | 9.521  | 12.547 | 11.767 | 10.194 | 6.589  | 11.116 | 1.102  |  |
| 0 | 3 | 599.3  | 1796.0 | 53.9 | 65.939 | 135.047 | 189.012 | 59.468 | 113.971 | 59.508 | 36.073 | 44.454 | 15.291 | 73.799 | 79.256 | 16.506 |  |
| 0 | 2 | 716.8  | 1432.7 | 45.3 | 14.335 | 14.215  | 10.957  | 14.587 | 11.997  | 9.521  | 12.547 | 7.845  | 16.566 | 13.178 | 12.575 | 0.822  |  |
| 0 | 3 | 632.0  | 1893.9 | 31.2 | 1.433  | 0.071   | 0.014   | 0.011  | 0.015   | 0.012  | 0.016  | 1.307  | 1.274  | 1.318  | 0.547  | 0.214  |  |
| 0 | 2 | 757.9  | 1514.7 | 23.4 | 0.014  | 0.071   | 0.014   | 1.122  | 0.015   | 0.012  | 0.016  | 0.013  | 0.013  | 1.318  | 0.261  | 0.161  |  |
| 0 | 2 | 660.3  | 1319.6 | 33.8 | 4.300  | 7.108   | 1.370   | 2.244  | 2.999   | 2.380  | 1.568  | 2.615  | 3.823  | 1.318  | 2.973  | 0.557  |  |
| 0 | 2 | 1082.6 | 2164.2 | 88.5 | 47.304 | 21.323  | 6.848   | 66.201 | 58.485  | 45.226 | 62.735 | 50.991 | 47.148 | 35.582 | 44.184 | 5.859  |  |
| 0 | 2 | 571.8  | 1142.5 | 40.2 | 1.433  | 0.071   | 0.014   | 0.011  | 0.015   | 0.012  | 0.016  | 0.013  | 0.013  | 0.013  | 0.161  | 0.141  |  |
| 0 | 3 | 642.6  | 1925.8 | 37.3 | 11.468 | 21.323  | 13.697  | 11.220 | 14.996  | 13.092 | 12.547 | 13.075 | 8.920  | 14.496 | 13.483 | 1.033  |  |
| 0 | 3 | 456.6  | 1367.7 | 19.1 | 4.300  | 0.071   | 4.109   | 1.122  | 2.999   | 1.190  | 1.568  | 0.013  | 1.274  | 1.318  | 1.797  | 0.478  |  |
| 2 | 4 | 889.7  | 3555.8 | 66.6 | 0.014  | 0.071   | 0.014   | 1.122  | 0.015   | 0.012  | 0.016  | 0.013  | 0.013  | 0.013  | 0.130  | 0.110  |  |
| 1 | 3 | 1062.9 | 3186.6 | 67.0 | 2.867  | 0.071   | 0.014   | 3.366  | 1.500   | 4.761  | 0.016  | 3.922  | 2.549  | 1.318  | 2.038  | 0.543  |  |
| 0 | 2 | 699.9  | 1398.8 | 54.4 | 2.867  | 7.108   | 1.370   | 1.122  | 1.500   | 4.761  | 1.568  | 1.307  | 3.823  | 1.318  | 2.674  | 0.631  |  |
| 2 | 3 | 474.6  | 1421.8 | 23.6 | 0.014  | 0.071   | 1.370   | 1.122  | 1.500   | 1.190  | 0.016  | 1.307  | 0.013  | 0.013  | 0.662  | 0.214  |  |
| 1 | 4 | 680.4  | 2718.4 | 60.1 | 1.433  | 0.071   | 0.014   | 0.011  | 0.015   | 1.190  | 0.016  | 0.013  | 1.274  | 1.318  | 0.536  | 0.210  |  |
| 1 | 3 | 431.9  | 1293.7 | 26.4 | 1.433  | 0.071   | 0.014   | 1.122  | 0.015   | 1.190  | 0.016  | 1.307  | 0.013  | 0.013  | 0.519  | 0.204  |  |
| 0 | 2 | 797.9  | 1594.8 | 50.0 | 0.014  | 0.071   | 0.014   | 0.011  | 0.015   | 1.190  | 1.568  | 1.307  | 0.013  | 1.318  | 0.552  | 0.218  |  |
| 0 | 2 | 464.7  | 928.5  | 44.7 | 0.014  | 0.071   | 1.370   | 1.122  | 0.015   | 0.012  | 0.016  | 0.013  | 1.274  | 0.013  | 0.392  | 0.189  |  |
| 1 | 3 | 632.3  | 1894.9 | 28.6 | 1.433  | 0.071   | 0.014   | 0.011  | 0.015   | 1.190  | 0.016  | 0.013  | 0.013  | 1.318  | 0.409  | 0.198  |  |
| 0 | 2 | 417.7  | 834.4  | 41.2 | 1.433  | 0.071   | 0.014   | 1.122  | 0.015   | 0.012  | 0.016  | 0.013  | 1.274  | 0.013  | 0.398  | 0.193  |  |
| 1 | 4 | 458.8  | 1832.0 | 30.2 | 0.014  | 0.071   | 1.370   | 0.011  | 0.015   | 0.012  | 0.016  | 0.013  | 2.549  | 1.318  | 0.539  | 0.283  |  |
| 0 | 2 | 707.4  | 1413.7 | 62.4 | 0.014  | 0.071   | 0.014   | 0.011  | 0.015   | 1.190  | 0.016  | 0.013  | 1.274  | 0.013  | 0.263  | 0.162  |  |
| 0 | 2 | 882.4  | 1763.8 | 45.7 | 0.014  | 0.071   | 0.014   | 0.011  | 0.015   | 1.190  | 0.016  | 0.013  | 1.274  | 0.013  | 0.263  | 0.162  |  |
| 0 | 2 | 768.9  | 1536.8 | 52.6 | 0.014  | 0.071   | 0.014   | 0.011  | 0.015   | 0.012  | 0.016  | 0.013  | 1.274  | 1.318  | 0.276  | 0.170  |  |

12 Supplemental Digital Content 2.xlsx

|         |         |         |        |        |        |        |         |        |        |        |        |       |        |
|---------|---------|---------|--------|--------|--------|--------|---------|--------|--------|--------|--------|-------|--------|
| 0.010   | 0.019   | 1.532   | 0.012  | 1.213  | 1.316  | 0.014  | 1.501   | 0.014  | 0.014  | 0.564  | 0.227  | 0.935 |        |
| 0.010   | 0.019   | 0.015   | 1.166  | 0.012  | 0.013  | 0.014  | 0.015   | 0.014  | 1.381  | 0.266  | 0.169  | 0.938 |        |
| 0.010   | 0.019   | 0.015   | 0.012  | 0.012  | 0.013  | 0.014  | 0.015   | 0.014  | 1.381  | 0.151  | 0.137  | 0.941 |        |
| 0.010   | 0.019   | 0.015   | 0.012  | 0.012  | 0.013  | 0.014  | 0.015   | 0.014  | 1.381  | 0.151  | 0.137  | 0.941 |        |
| 4.000   | 5.659   | 4.595   | 6.995  | 3.638  | 2.632  | 4.157  | 4.504   | 1.395  | 2.762  | 4.034  | 0.502  | 0.942 |        |
| 2.000   | 5.659   | 3.064   | 0.012  | 2.425  | 2.632  | 2.771  | 0.015   | 5.580  | 0.014  | 2.417  | 0.655  | 0.942 |        |
| 1.000   | 1.886   | 1.532   | 1.166  | 0.012  | 1.316  | 1.386  | 1.501   | 1.395  | 1.381  | 1.257  | 0.157  | 0.948 |        |
| 5.000   | 0.019   | 1.532   | 5.829  | 4.851  | 5.263  | 4.157  | 15.014  | 4.185  | 9.668  | 5.552  | 1.325  | 0.953 |        |
| 0.010   | 1.886   | 0.015   | 1.166  | 1.213  | 1.316  | 0.014  | 0.015   | 0.014  | 1.381  | 0.703  | 0.238  | 0.954 |        |
| 1.000   | 0.019   | 0.015   | 1.166  | 0.012  | 0.013  | 1.386  | 1.501   | 1.395  | 0.014  | 0.652  | 0.217  | 0.956 |        |
| 1.000   | 1.886   | 1.532   | 1.166  | 1.213  | 0.013  | 1.386  | 0.015   | 1.395  | 1.381  | 1.099  | 0.195  | 0.959 |        |
| 0.010   | 0.019   | 0.015   | 1.166  | 0.012  | 0.013  | 0.014  | 0.015   | 0.014  | 0.014  | 0.129  | 0.115  | 0.963 |        |
| 0.010   | 0.019   | 0.015   | 1.166  | 0.012  | 0.013  | 0.014  | 0.015   | 0.014  | 0.014  | 0.129  | 0.115  | 0.963 |        |
| 0.010   | 0.019   | 0.015   | 1.166  | 0.012  | 0.013  | 0.014  | 0.015   | 0.014  | 0.014  | 0.129  | 0.115  | 0.963 |        |
| 1.000   | 1.886   | 0.015   | 2.332  | 1.213  | 1.316  | 1.386  | 3.003   | 1.395  | 1.381  | 1.493  | 0.252  | 0.964 |        |
| 0.010   | 0.019   | 1.532   | 0.012  | 0.012  | 2.632  | 1.386  | 0.015   | 0.014  | 0.014  | 0.564  | 0.298  | 0.964 |        |
| 12.000  | 7.545   | 6.127   | 9.326  | 15.766 | 9.211  | 16.628 | 7.507   | 16.740 | 11.049 | 11.190 | 1.255  | 0.965 |        |
| 132.000 | 111.284 | 150.113 | 39.637 | 98.233 | 75.003 | 41.569 | 117.111 | 33.480 | 4.143  | 80.257 | 15.405 | 0.965 |        |
| 11.000  | 13.203  | 15.318  | 9.326  | 12.127 | 9.211  | 22.170 | 9.009   | 13.950 | 11.049 | 12.636 | 1.254  | 0.968 |        |
| 0.010   | 0.019   | 0.015   | 0.012  | 0.012  | 1.316  | 1.386  | 0.015   | 1.395  | 1.381  | 0.556  | 0.221  | 0.977 |        |
| 0.010   | 0.019   | 0.015   | 1.166  | 0.012  | 0.013  | 0.014  | 0.015   | 1.395  | 0.014  | 0.267  | 0.170  | 0.978 |        |
| 3.000   | 7.545   | 3.064   | 0.012  | 2.425  | 1.316  | 2.771  | 1.501   | 4.185  | 4.143  | 2.996  | 0.648  | 0.978 |        |
| 51.000  | 33.951  | 9.191   | 44.300 | 75.190 | 25.001 | 37.412 | 37.535  | 85.095 | 45.576 | 44.425 | 7.048  | 0.979 |        |
| 0.010   | 0.019   | 1.532   | 0.012  | 0.012  | 0.013  | 0.014  | 0.015   | 0.014  | 0.014  | 0.165  | 0.152  | 0.984 |        |
| 12.000  | 9.431   | 18.381  | 11.658 | 9.702  | 18.422 | 12.471 | 16.516  | 12.555 | 13.811 | 13.495 | 1.032  | 0.994 |        |
| 1.000   | 1.886   | 3.064   | 1.166  | 1.213  | 2.632  | 1.386  | 1.501   | 1.395  | 2.762  | 1.800  | 0.236  | 0.994 |        |
| 0.010   | 0.019   | 0.015   | 1.166  | 0.012  | 0.013  | 0.014  | 0.015   | 0.014  | 0.014  | 0.129  | 0.115  | 0.995 |        |
| 2.000   | 0.019   | 0.015   | 3.497  | 2.425  | 2.632  | 2.771  | 1.501   | 2.790  | 2.762  | 2.041  | 0.376  | 0.996 |        |
| 2.000   | 1.886   | 1.532   | 3.497  | 1.213  | 2.632  | 4.157  | 1.501   | 4.185  | 4.143  | 2.675  | 0.383  | 1.000 |        |
| 0.010   | 0.019   | 0.015   | 0.012  | 0.012  | 0.013  | 0.014  | 0.015   | 0.014  | 0.014  | 0.014  | 0.001  | 0.007 | p<0.05 |
| 0.010   | 0.019   | 0.015   | 0.012  | 0.012  | 0.013  | 0.014  | 0.015   | 0.014  | 0.014  | 0.014  | 0.001  | 0.023 | p<0.05 |
| 0.010   | 0.019   | 0.015   | 0.012  | 0.012  | 0.013  | 0.014  | 0.015   | 0.014  | 0.014  | 0.014  | 0.001  | 0.023 | p<0.05 |
| 0.010   | 0.019   | 0.015   | 0.012  | 0.012  | 0.013  | 0.014  | 0.015   | 0.014  | 0.014  | 0.014  | 0.001  | 0.024 | p<0.05 |
| 0.010   | 0.019   | 0.015   | 0.012  | 0.012  | 0.013  | 0.014  | 0.015   | 0.014  | 0.014  | 0.014  | 0.001  | 0.061 | p<0.05 |
| 0.010   | 0.019   | 0.015   | 0.012  | 0.012  | 0.013  | 0.014  | 0.015   | 0.014  | 0.014  | 0.014  | 0.001  | 0.061 | p<0.05 |
| 0.010   | 0.019   | 0.015   | 0.012  | 0.012  | 0.013  | 0.014  | 0.015   | 0.014  | 0.014  | 0.014  | 0.001  | 0.062 | p<0.05 |
| 0.010   | 0.019   | 0.015   | 0.012  | 0.012  | 0.013  | 0.014  | 0.015   | 0.014  | 0.014  | 0.014  | 0.001  | 0.080 | p<0.05 |
| 0.010   | 0.019   | 0.015   | 0.012  | 0.012  | 0.013  | 0.014  | 0.015   | 0.014  | 0.014  | 0.014  | 0.001  | 0.140 | p<0.05 |
| 0.010   | 0.019   | 0.015   | 0.012  | 0.012  | 0.013  | 0.014  | 0.015   | 0.014  | 0.014  | 0.014  | 0.001  | 0.140 | p<0.05 |
| 0.010   | 0.019   | 0.015   | 0.012  | 0.012  | 0.013  | 0.014  | 0.015   | 0.014  | 0.014  | 0.014  | 0.001  | 0.141 | p<0.05 |

## 12 Supplemental Digital Content 2.xlsx

|     |           |                                                          |                                      |                                                                      |      |
|-----|-----------|----------------------------------------------------------|--------------------------------------|----------------------------------------------------------------------|------|
| 446 | 5453914   | phospholipid transfer protein                            | GKEGHFYnISeVK                        | N9(Deamidated)                                                       | 2.86 |
| 447 | 178557739 | complement C4-B                                          | GLnVTLSSSTGRnGFK                     | N3(Deamidated); N12(Deamidated)                                      | 3.49 |
| 448 | 105990535 | coagulation factor V                                     | TWnQSIAlR                            | N3(Deamidated)                                                       | 2.17 |
| 449 | 45580688  | complement component C7                                  | nYTLTGR                              | N1(Deamidated)                                                       | 1.59 |
| 450 | 162809334 | pregnancy zone protein                                   | KGcVLLSHLnETVTVSASLESGR              | C3(Carbamidomethyl); N10(Deamidated)                                 | 3.21 |
| 451 | 557440747 | junctional adhesion molecule-like                        | TcGnKSSVnSTVLVKnTK                   | C2(Carbamidomethyl); N4(Deamidated); N9(Deamidated); N16(Deamidated) | 1.88 |
| 452 | 296010988 | multiple inositol polyphosphate phosphatase 1            | FLTEVEKnATALYHVEAFK                  | N8(Deamidated)                                                       | 2.15 |
| 453 | 14249738  | N-acetylglucosamine-1-phosphotransferase subunit gamma   | YEFcPFHnVTQHEQTFR                    | C4(Carbamidomethyl); N8(Deamidated)                                  | 3.00 |
| 454 | 530417477 | IgGfC-binding protein                                    | FDFQGTcEYLLSAPcHGPPPLGAEnFTVTVANEHR  | C7(Carbamidomethyl); C15(Carbamidomethyl); N24(Deamidated)           | 5.09 |
| 455 | 530370892 | tissue factor pathway inhibitor                          | YFYnNqTK                             | N5(Deamidated)                                                       | 1.76 |
| 456 | 11342670  | azurocidin                                               | FVnVTVPEDQcRPNNVcTGVLTR              | N3(Deamidated); C12(Carbamidomethyl); C18(Carbamidomethyl)           | 2.62 |
| 457 | 285002214 | cadherin-related family member 2                         | GSnGTFLLSLGGPDAAEFVSPER              | N3(Deamidated)                                                       | 1.69 |
| 458 | 32313593  | olfactomedin-4                                           | LLnLTVR                              | N3(Deamidated)                                                       | 2.06 |
| 459 | 31377806  | polymeric immunoglobulin receptor                        | IIEGEPnLKVPnVTAVLGETLK               | N7(Deamidated); N13(Deamidated)                                      | 3.24 |
| 460 | 31377806  | polymeric immunoglobulin receptor                        | GLSFDVSLVSVQSGPGLLnDTK               | N18(Deamidated)                                                      | 2.99 |
| 461 | 530406518 | CD276 antigen                                            | QLVHSAEAGDQGSAYAnR                   | N18(Deamidated)                                                      | 3.02 |
| 462 | 530406518 | CD276 antigen                                            | VVLGAnGTYSCLVR                       | N6(Deamidated); C11(Carbamidomethyl)                                 | 3.32 |
| 463 | 530384408 | transmembrane glycoprotein NMB                           | nDRNSSDETFK                          | N1(Deamidated)                                                       | 2.09 |
| 464 | 223671930 | ADAM DEC1                                                | EHAVFTSNQEEQDPAnHTcGVK               | N16(Deamidated); C19(Carbamidomethyl)                                | 2.48 |
| 465 | 118582275 | extracellular superoxide dismutase                       | LDAFFALEGFPTEPnSSSR                  | N15(Deamidated)                                                      | 1.89 |
| 466 | 339882741 | HLA class I histocompatibility antigen, Cw-1 alpha chain | GYnQSEdGSHTLQR                       | N4(Deamidated)                                                       | 2.57 |
| 467 | 10835071  | HLA class II histocompatibility antigen gamma chain      | YGnmTEDHvHLLQnADPLK                  | N3(Deamidated); M4(Oxidation); M10(Oxidation)                        | 1.92 |
| 468 | 289547633 | leukocyte immunoglobulin-like receptor A3                | QPQAGLSQAnFTLGPVSR                   | N10(Deamidated)                                                      | 1.87 |
| 469 | 262206315 | L-selectin                                               | FcRnYTDLVAIQNK                       | C2(Carbamidomethyl); N5(Deamidated)                                  | 2.54 |
| 470 | 27262659  | macrophage colony-stimulating factor 1 receptor          | VVESAYLnLSSEQnLIQEVTVGEGNLNK         | N8(Deamidated); N14(Deamidated)                                      | 3.53 |
| 471 | 148762980 | sialic acid-binding Ig-like lectin 14                    | SSELTLP RPEDHGTnLcQVK                | N16(Deamidated); C19(Carbamidomethyl)                                | 3.02 |
| 472 | 315434271 | vascular cell adhesion protein 1                         | SEGtnSTLTLSPVSEFENEHSYLcTVTcGHK      | N5(Deamidated); C23(Carbamidomethyl); C27(Carbamidomethyl)           | 4.57 |
| 473 | 315434271 | vascular cell adhesion protein 1                         | DPEIEmSGGLVnGSSVTVScK                | M6(Oxidation); N12(Deamidated); C20(Carbamidomethyl)                 | 2.51 |
| 474 | 88853069  | vitronectin                                              | FEDGVLDPDYPRnISDGFdGIPDnVDAALALPAHSY | N13(Deamidated); N24(Deamidated)                                     | 4.31 |
| 475 | 262050538 | inter-alpha-trypsin inhibitor heavy chain H4             | NOALnLSLAYSFVPLTSMVVTkPDDQEQSQVAEK   | N5(Deamidated); M19(Oxidation); M37(Oxidation)                       | 3.66 |
| 476 | 262050538 | inter-alpha-trypsin inhibitor heavy chain H4             | KAFITnFSmIDGmTYPGIIKEK               | N6(Deamidated); M9(Oxidation); M14(Oxidation)                        | 2.72 |
| 477 | 52353294  | olfactory receptor 8H3                                   | DOVAPVFYTIVIPMLNPLIYSLRnR            | N24(Deamidated)                                                      | 2.15 |
| 478 | 162809334 | pregnancy zone protein                                   | TFSSmTcASGAnVSEQLSLK                 | M5(Oxidation); C7(Carbamidomethyl); N12(Deamidated)                  | 3.45 |
| 479 | 532691763 | adenosine deaminase CECR1                                | NILDALmLnTTR                         | M7(Oxidation); N9(Deamidated)                                        | 1.82 |
| 480 | 333944020 | cadherin-13                                              | InNTHALVSLLOnLNK                     | N2(Deamidated)                                                       | 3.78 |
| 481 | 133925809 | inter-alpha-trypsin inhibitor heavy chain H3             | EnLTAR                               | N2(Deamidated)                                                       | 1.67 |
| 482 | 212549546 | POTE ankyrin domain family member C                      | QLSEEQNTGISQDEILTnK                  | N18(Deamidated)                                                      | 1.79 |
| 483 | 530377645 | complement factor I                                      | nGTAVcATNR                           | N1(Deamidated); C6(Carbamidomethyl)                                  | 1.59 |
| 484 | 530376005 | limbin                                                   | mLLQnYSKIQENVEELMDFFQASK             | M1(Oxidation); N5(Deamidated)                                        | 1.66 |
| 485 | 514239920 | complement component C8 beta chain                       | EYESYDFERnVTEK                       | N11(Deamidated)                                                      | 2.27 |
| 486 | 530383020 | CD109 antigen                                            | HLnGTITAK                            | N3(Deamidated)                                                       | 1.60 |
| 487 | 530389137 | ectonucleotide pyrophosphatase/phosphodiesterase 2       | AllAnLTcK                            | N5(Deamidated); C8(Carbamidomethyl)                                  | 1.85 |

12 Supplemental Digital Content 2.xlsx

|   |   |        |        |      |       |       |       |       |       |       |       |       |       |       |       |       |  |
|---|---|--------|--------|------|-------|-------|-------|-------|-------|-------|-------|-------|-------|-------|-------|-------|--|
| 1 | 4 | 418.7  | 1671.8 | 33.6 | 0.014 | 0.071 | 0.014 | 0.011 | 0.015 | 0.012 | 0.016 | 0.013 | 1.274 | 1.318 | 0.276 | 0.170 |  |
| 1 | 3 | 518.3  | 1552.8 | 38.4 | 0.014 | 0.071 | 0.014 | 1.122 | 0.015 | 0.012 | 0.016 | 1.307 | 0.013 | 0.013 | 0.260 | 0.160 |  |
| 0 | 2 | 545.3  | 1089.6 | 40.0 | 1.433 | 0.071 | 1.370 | 0.011 | 0.015 | 0.012 | 0.016 | 0.013 | 0.013 | 0.013 | 0.297 | 0.184 |  |
| 0 | 2 | 413.2  | 825.4  | 24.8 | 1.433 | 0.071 | 1.370 | 0.011 | 0.015 | 0.012 | 0.016 | 0.013 | 0.013 | 0.013 | 0.297 | 0.184 |  |
| 1 | 4 | 615.3  | 2458.3 | 51.7 | 1.433 | 0.071 | 0.014 | 0.011 | 0.015 | 0.012 | 0.016 | 1.307 | 0.013 | 0.013 | 0.291 | 0.180 |  |
| 2 | 3 | 647.3  | 1940.0 | 39.3 | 0.014 | 0.071 | 0.014 | 0.011 | 0.015 | 0.012 | 0.016 | 0.013 | 1.274 | 2.636 | 0.408 | 0.277 |  |
| 1 | 4 | 553.5  | 2211.1 | 57.5 | 0.014 | 0.071 | 0.014 | 1.122 | 0.015 | 0.012 | 0.016 | 0.013 | 0.013 | 0.013 | 0.130 | 0.110 |  |
| 0 | 4 | 561.0  | 2241.0 | 44.4 | 0.014 | 0.071 | 0.014 | 1.122 | 0.015 | 0.012 | 0.016 | 0.013 | 0.013 | 0.013 | 0.130 | 0.110 |  |
| 0 | 4 | 959.7  | 3835.8 | 66.5 | 0.014 | 0.071 | 0.014 | 0.011 | 0.015 | 1.190 | 0.016 | 0.013 | 0.013 | 0.013 | 0.137 | 0.117 |  |
| 0 | 2 | 539.7  | 1078.5 | 25.5 | 0.014 | 0.071 | 0.014 | 0.011 | 0.015 | 1.190 | 0.016 | 0.013 | 0.013 | 0.013 | 0.137 | 0.117 |  |
| 0 | 3 | 926.4  | 2777.3 | 46.0 | 0.014 | 0.071 | 0.014 | 0.011 | 0.015 | 1.190 | 0.016 | 0.013 | 0.013 | 0.013 | 0.137 | 0.117 |  |
| 0 | 2 | 1205.1 | 2409.2 | 70.6 | 0.014 | 0.071 | 0.014 | 0.011 | 0.015 | 1.190 | 0.016 | 0.013 | 0.013 | 0.013 | 0.137 | 0.117 |  |
| 0 | 2 | 415.3  | 829.5  | 40.6 | 0.014 | 0.071 | 0.014 | 0.011 | 0.015 | 1.190 | 0.016 | 0.013 | 0.013 | 0.013 | 0.137 | 0.117 |  |
| 1 | 3 | 798.4  | 2393.3 | 63.3 | 0.014 | 0.071 | 0.014 | 0.011 | 0.015 | 1.190 | 0.016 | 0.013 | 0.013 | 0.013 | 0.137 | 0.117 |  |
| 0 | 2 | 1089.1 | 2177.1 | 68.5 | 0.014 | 0.071 | 0.014 | 0.011 | 0.015 | 1.190 | 0.016 | 0.013 | 0.013 | 0.013 | 0.137 | 0.117 |  |
| 0 | 3 | 693.7  | 2078.9 | 32.3 | 0.014 | 0.071 | 0.014 | 0.011 | 0.015 | 0.012 | 0.016 | 0.013 | 1.274 | 0.013 | 0.145 | 0.126 |  |
| 0 | 2 | 755.4  | 1509.8 | 45.8 | 0.014 | 0.071 | 0.014 | 0.011 | 0.015 | 0.012 | 0.016 | 0.013 | 1.274 | 0.013 | 0.145 | 0.126 |  |
| 1 | 3 | 476.2  | 1426.6 | 24.3 | 0.014 | 0.071 | 0.014 | 0.011 | 0.015 | 0.012 | 0.016 | 0.013 | 1.274 | 0.013 | 0.145 | 0.126 |  |
| 0 | 4 | 625.5  | 2499.1 | 25.8 | 0.014 | 0.071 | 0.014 | 0.011 | 0.015 | 0.012 | 0.016 | 0.013 | 1.274 | 0.013 | 0.145 | 0.126 |  |
| 0 | 2 | 1043.5 | 2086.0 | 71.7 | 0.014 | 0.071 | 0.014 | 0.011 | 0.015 | 0.012 | 0.016 | 0.013 | 1.274 | 0.013 | 0.145 | 0.126 |  |
| 0 | 3 | 585.9  | 1755.8 | 25.6 | 0.014 | 0.071 | 0.014 | 0.011 | 0.015 | 0.012 | 0.016 | 0.013 | 1.274 | 0.013 | 0.145 | 0.126 |  |
| 0 | 4 | 590.5  | 2359.1 | 48.7 | 0.014 | 0.071 | 0.014 | 0.011 | 0.015 | 0.012 | 0.016 | 0.013 | 1.274 | 0.013 | 0.145 | 0.126 |  |
| 0 | 2 | 936.5  | 1872.0 | 50.4 | 0.014 | 0.071 | 0.014 | 0.011 | 0.015 | 0.012 | 0.016 | 0.013 | 1.274 | 0.013 | 0.145 | 0.126 |  |
| 1 | 3 | 620.0  | 1857.9 | 43.5 | 0.014 | 0.071 | 0.014 | 0.011 | 0.015 | 0.012 | 0.016 | 0.013 | 1.274 | 0.013 | 0.145 | 0.126 |  |
| 0 | 3 | 1016.9 | 3048.6 | 79.4 | 0.014 | 0.071 | 0.014 | 0.011 | 0.015 | 0.012 | 0.016 | 0.013 | 1.274 | 0.013 | 0.145 | 0.126 |  |
| 0 | 4 | 621.8  | 2484.2 | 36.4 | 0.014 | 0.071 | 0.014 | 0.011 | 0.015 | 0.012 | 0.016 | 0.013 | 1.274 | 0.013 | 0.145 | 0.126 |  |
| 0 | 4 | 839.9  | 3356.5 | 54.6 | 0.014 | 0.071 | 0.014 | 0.011 | 0.015 | 0.012 | 0.016 | 0.013 | 1.274 | 0.013 | 0.145 | 0.126 |  |
| 0 | 2 | 1092.0 | 2183.0 | 44.9 | 0.014 | 0.071 | 0.014 | 0.011 | 0.015 | 0.012 | 0.016 | 0.013 | 1.274 | 0.013 | 0.145 | 0.126 |  |
| 1 | 4 | 1045.2 | 4178.0 | 72.0 | 0.014 | 0.071 | 0.014 | 0.011 | 0.015 | 0.012 | 0.016 | 0.013 | 1.274 | 0.013 | 0.145 | 0.126 |  |
| 0 | 3 | 1557.8 | 4671.3 | 68.4 | 0.014 | 0.071 | 0.014 | 0.011 | 0.015 | 0.012 | 0.016 | 1.307 | 0.013 | 0.013 | 0.149 | 0.129 |  |
| 2 | 4 | 663.3  | 2650.4 | 61.0 | 0.014 | 0.071 | 0.014 | 0.011 | 0.015 | 0.012 | 0.016 | 1.307 | 0.013 | 0.013 | 0.149 | 0.129 |  |
| 1 | 3 | 978.5  | 2933.6 | 74.0 | 0.014 | 0.071 | 0.014 | 0.011 | 0.015 | 0.012 | 0.016 | 1.307 | 0.013 | 0.013 | 0.149 | 0.129 |  |
| 0 | 2 | 1068.0 | 2135.0 | 43.8 | 0.014 | 0.071 | 0.014 | 0.011 | 0.015 | 0.012 | 0.016 | 1.307 | 0.013 | 0.013 | 0.149 | 0.129 |  |
| 0 | 2 | 696.4  | 1391.7 | 61.8 | 0.014 | 0.071 | 0.014 | 0.011 | 0.015 | 0.012 | 0.016 | 0.013 | 0.013 | 1.318 | 0.150 | 0.130 |  |
| 0 | 3 | 598.3  | 1793.0 | 61.8 | 0.014 | 0.071 | 0.014 | 0.011 | 0.015 | 0.012 | 0.016 | 0.013 | 0.013 | 1.318 | 0.150 | 0.130 |  |
| 0 | 2 | 352.7  | 704.4  | 15.7 | 0.014 | 0.071 | 0.014 | 0.011 | 0.015 | 0.012 | 0.016 | 0.013 | 0.013 | 1.318 | 0.150 | 0.130 |  |
| 0 | 3 | 716.7  | 2148.0 | 62.5 | 0.014 | 0.071 | 0.014 | 0.011 | 0.015 | 0.012 | 0.016 | 0.013 | 0.013 | 1.318 | 0.150 | 0.130 |  |
| 0 | 2 | 532.7  | 1064.5 | 15.7 | 0.014 | 0.071 | 1.370 | 0.011 | 0.015 | 0.012 | 0.016 | 0.013 | 0.013 | 0.013 | 0.155 | 0.135 |  |
| 1 | 3 | 974.8  | 2922.4 | 30.5 | 0.014 | 0.071 | 1.370 | 0.011 | 0.015 | 0.012 | 0.016 | 0.013 | 0.013 | 0.013 | 0.155 | 0.135 |  |
| 1 | 3 | 632.9  | 1896.8 | 41.8 | 0.014 | 0.071 | 1.370 | 0.011 | 0.015 | 0.012 | 0.016 | 0.013 | 0.013 | 0.013 | 0.155 | 0.135 |  |
| 0 | 2 | 478.3  | 955.5  | 16.5 | 1.433 | 0.071 | 0.014 | 0.011 | 0.015 | 0.012 | 0.016 | 0.013 | 0.013 | 0.013 | 0.161 | 0.141 |  |
| 0 | 2 | 502.8  | 1004.5 | 35.3 | 1.433 | 0.071 | 0.014 | 0.011 | 0.015 | 0.012 | 0.016 | 0.013 | 0.013 | 0.013 | 0.161 | 0.141 |  |



## 12 Supplemental Digital Content 2.xlsx

|     |           |                                                              |                               |                                                                           |      |
|-----|-----------|--------------------------------------------------------------|-------------------------------|---------------------------------------------------------------------------|------|
| 488 | 530393969 | protein FAM178A                                              | KQnDIIPGKNNLSNVENGHLSR        | N3(Deamidated)                                                            | 1.73 |
| 489 | 153285408 | microsomal triglyceride transfer protein large subunit       | TAAAAILnNnPSYmDVK             | N9(Deamidated); N11(Deamidated); M15(Oxidation)                           | 2.01 |
| 490 | 544346180 | plexin domain-containing protein 2                           | VnLSFDFFPYGHFLR               | N2(Deamidated)                                                            | 2.20 |
| 491 | 27436940  | reelin                                                       | APSnVSTIIHILYPEDAK            | N4(Deamidated)                                                            | 2.18 |
| 492 | 226371613 | sex hormone-binding globulin                                 | SHEIWTHScPQSPGnGTDASH         | C9(Carbamidomethyl); N15(Deamidated)                                      | 2.54 |
| 493 | 530369184 | interleukin-1 receptor antagonist protein                    | LQLEAVnITDLENRK               | N7(Deamidated)                                                            | 3.70 |
| 494 | 530397208 | plasma protease C1 inhibitor                                 | AKVGQLQLSHnLSLVLPQnLK         | N11(Deamidated); N21(Deamidated)                                          | 2.96 |
| 495 | 31559825  | polycystic kidney disease protein 1-like 3                   | WWIGQNV MPLKKHQDnK            | N16(Deamidated)                                                           | 1.76 |
| 496 | 307775422 | low-density lipoprotein receptor                             | LTGSDVnLLAENLLSPEDmVLFHnLTQPR | N7(Deamidated); M19(Oxidation); N24(Deamidated)                           | 2.57 |
| 497 | 315434271 | vascular cell adhesion protein 1                             | QLPnGELQPLSEnATLTLISTK        | N4(Deamidated); N13(Deamidated)                                           | 4.00 |
| 498 | 530370065 | fibronectin                                                  | RHEEGHmLncTcFGQGR             | M7(Oxidation); N9(Deamidated); C10(Carbamidomethyl); C12(Carbamidomethyl) | 2.88 |
| 499 | 546231210 | serine/threonine-protein phosphatase 4 regulatory subunit 3A | SFLFEPVVKAFLNnGSR             | N14(Deamidated)                                                           | 1.84 |
| 500 | 530406518 | CD276 antigen                                                | TALFPDLLAQGnASLR              | N12(Deamidated)                                                           | 3.60 |
| 501 | 205277441 | thyroxine-binding globulin                                   | TLYETE VFSTDFSnSAAK           | N14(Deamidated)                                                           | 1.82 |

12 Supplemental Digital Content 2.xlsx

|   |   |        |        |      |       |       |       |       |       |       |       |       |       |       |       |       |  |
|---|---|--------|--------|------|-------|-------|-------|-------|-------|-------|-------|-------|-------|-------|-------|-------|--|
| 2 | 3 | 816.8  | 2448.3 | 63.7 | 1.433 | 0.071 | 0.014 | 0.011 | 0.015 | 0.012 | 0.016 | 0.013 | 0.013 | 0.013 | 0.161 | 0.141 |  |
| 0 | 4 | 481.7  | 1923.9 | 28.2 | 1.433 | 0.071 | 0.014 | 0.011 | 0.015 | 0.012 | 0.016 | 0.013 | 0.013 | 0.013 | 0.161 | 0.141 |  |
| 0 | 3 | 620.6  | 1859.9 | 71.9 | 1.433 | 0.071 | 0.014 | 0.011 | 0.015 | 0.012 | 0.016 | 0.013 | 0.013 | 0.013 | 0.161 | 0.141 |  |
| 0 | 3 | 694.7  | 2082.1 | 67.7 | 1.433 | 0.071 | 0.014 | 0.011 | 0.015 | 0.012 | 0.016 | 0.013 | 0.013 | 0.013 | 0.161 | 0.141 |  |
| 0 | 4 | 577.2  | 2306.0 | 24.8 | 1.433 | 0.071 | 0.014 | 0.011 | 0.015 | 0.012 | 0.016 | 0.013 | 0.013 | 0.013 | 0.161 | 0.141 |  |
| 1 | 3 | 615.3  | 1844.0 | 49.3 | 0.014 | 0.071 | 0.014 | 0.011 | 1.500 | 0.012 | 0.016 | 0.013 | 0.013 | 0.013 | 0.168 | 0.148 |  |
| 1 | 4 | 629.4  | 2514.5 | 62.2 | 0.014 | 0.071 | 0.014 | 0.011 | 1.500 | 0.012 | 0.016 | 0.013 | 0.013 | 0.013 | 0.168 | 0.148 |  |
| 2 | 4 | 531.5  | 2123.1 | 61.0 | 0.014 | 0.071 | 0.014 | 0.011 | 1.500 | 0.012 | 0.016 | 0.013 | 0.013 | 0.013 | 0.168 | 0.148 |  |
| 0 | 3 | 1085.6 | 3254.7 | 82.3 | 0.014 | 0.071 | 0.014 | 0.011 | 0.015 | 2.380 | 0.016 | 0.013 | 0.013 | 0.013 | 0.256 | 0.236 |  |
| 0 | 3 | 790.4  | 2369.3 | 68.9 | 0.014 | 0.071 | 0.014 | 0.011 | 0.015 | 0.012 | 0.016 | 0.013 | 2.549 | 0.013 | 0.273 | 0.253 |  |
| 1 | 4 | 527.2  | 2105.9 | 19.9 | 2.867 | 0.071 | 0.014 | 0.011 | 0.015 | 0.012 | 0.016 | 0.013 | 0.013 | 0.013 | 0.304 | 0.285 |  |
| 1 | 3 | 642.7  | 1926.0 | 73.0 | 2.867 | 0.071 | 0.014 | 0.011 | 0.015 | 0.012 | 0.016 | 0.013 | 0.013 | 0.013 | 0.304 | 0.285 |  |
| 0 | 3 | 563.3  | 1687.9 | 66.3 | 0.014 | 0.071 | 0.014 | 0.011 | 0.015 | 0.012 | 0.016 | 0.013 | 3.823 | 0.013 | 0.400 | 0.380 |  |
| 0 | 2 | 1062.5 | 2124.0 | 62.8 | 0.014 | 7.108 | 0.014 | 0.011 | 0.015 | 0.012 | 0.016 | 0.013 | 0.013 | 0.013 | 0.723 | 0.709 |  |

## 12 Supplemental Digital Content 2.xlsx

|       |       |       |       |       |       |       |       |       |       |       |       |       |        |
|-------|-------|-------|-------|-------|-------|-------|-------|-------|-------|-------|-------|-------|--------|
| 0.010 | 0.019 | 0.015 | 0.012 | 0.012 | 0.013 | 0.014 | 0.015 | 0.014 | 0.014 | 0.014 | 0.001 | 0.312 | p<0.05 |
| 0.010 | 0.019 | 0.015 | 0.012 | 0.012 | 0.013 | 0.014 | 0.015 | 0.014 | 0.014 | 0.014 | 0.001 | 0.312 | p<0.05 |
| 0.010 | 0.019 | 0.015 | 0.012 | 0.012 | 0.013 | 0.014 | 0.015 | 0.014 | 0.014 | 0.014 | 0.001 | 0.312 | p<0.05 |
| 0.010 | 0.019 | 0.015 | 0.012 | 0.012 | 0.013 | 0.014 | 0.015 | 0.014 | 0.014 | 0.014 | 0.001 | 0.312 | p<0.05 |
| 0.010 | 0.019 | 0.015 | 0.012 | 0.012 | 0.013 | 0.014 | 0.015 | 0.014 | 0.014 | 0.014 | 0.001 | 0.313 | p<0.05 |
| 0.010 | 0.019 | 0.015 | 0.012 | 0.012 | 0.013 | 0.014 | 0.015 | 0.014 | 0.014 | 0.014 | 0.001 | 0.313 | p<0.05 |
| 0.010 | 0.019 | 0.015 | 0.012 | 0.012 | 0.013 | 0.014 | 0.015 | 0.014 | 0.014 | 0.014 | 0.001 | 0.313 | p<0.05 |
| 0.010 | 0.019 | 0.015 | 0.012 | 0.012 | 0.013 | 0.014 | 0.015 | 0.014 | 0.014 | 0.014 | 0.001 | 0.318 | p<0.05 |
| 0.010 | 0.019 | 0.015 | 0.012 | 0.012 | 0.013 | 0.014 | 0.015 | 0.014 | 0.014 | 0.014 | 0.001 | 0.319 | p<0.05 |
| 0.010 | 0.019 | 0.015 | 0.012 | 0.012 | 0.013 | 0.014 | 0.015 | 0.014 | 0.014 | 0.014 | 0.001 | 0.321 | p<0.05 |
| 0.010 | 0.019 | 0.015 | 0.012 | 0.012 | 0.013 | 0.014 | 0.015 | 0.014 | 0.014 | 0.014 | 0.001 | 0.321 | p<0.05 |
| 0.010 | 0.019 | 0.015 | 0.012 | 0.012 | 0.013 | 0.014 | 0.015 | 0.014 | 0.014 | 0.014 | 0.001 | 0.323 | p<0.05 |
| 0.010 | 0.019 | 0.015 | 0.012 | 0.012 | 0.013 | 0.014 | 0.015 | 0.014 | 0.014 | 0.014 | 0.001 | 0.331 | p<0.05 |



Supplemental Digital Content 3

| Protein Group Accessions                                                                                                                                                                                                                                                                                                                                                                                                                                                                                                                                                                                                                                                                                                                                                                                                                                                                                                                                                                                                                                                    | Protein Descriptions      | Sequence                      | Modifications                            | XCorr | # Missed Cleavages | Charge | m/z [Da]  | MH+ [Da]   |
|-----------------------------------------------------------------------------------------------------------------------------------------------------------------------------------------------------------------------------------------------------------------------------------------------------------------------------------------------------------------------------------------------------------------------------------------------------------------------------------------------------------------------------------------------------------------------------------------------------------------------------------------------------------------------------------------------------------------------------------------------------------------------------------------------------------------------------------------------------------------------------------------------------------------------------------------------------------------------------------------------------------------------------------------------------------------------------|---------------------------|-------------------------------|------------------------------------------|-------|--------------------|--------|-----------|------------|
| 4502133                                                                                                                                                                                                                                                                                                                                                                                                                                                                                                                                                                                                                                                                                                                                                                                                                                                                                                                                                                                                                                                                     | serum amyloid P-component | ESVTDHVNLTIPLE<br>KPLQnFTLcFR | N19(Deamidated);<br>C23(Carbamidomethyl) | 6.83  | 0                  | 4      | 743.88495 | 2972.51797 |
| <p>Extracted from: D:\VTanMS\data\Piama_mike\Glyco_8.raw #22884 RT: 70.45<br/>FTMS, HCD@30.00, z=+4, Mono m/z=743.8866 Da, MH+=2972.52456 Da, Match Tol.=0.02 Da</p> 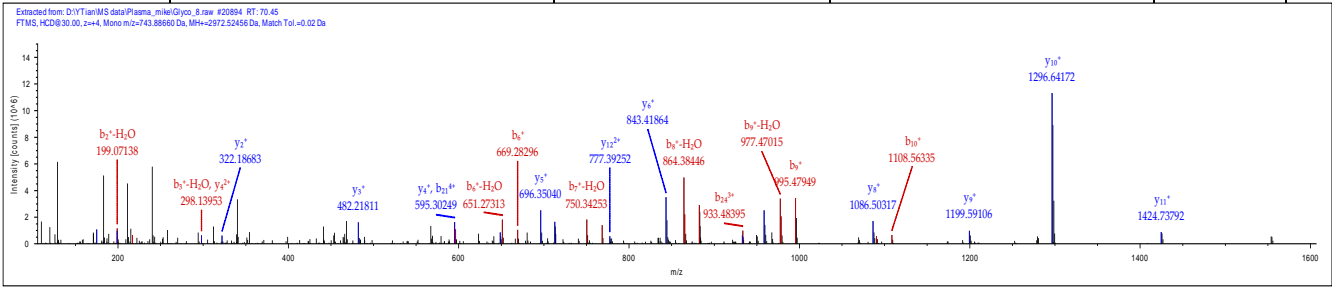 <p>Mass spectrum showing intensity (counts) on the y-axis (0 to 14) and m/z on the x-axis (0 to 1600). The base peak is at m/z 1296.64172 (y<sub>10</sub><sup>+</sup>). Other significant peaks include b<sub>1</sub><sup>+</sup>-H<sub>2</sub>O at 199.07138, y<sub>2</sub><sup>+</sup> at 322.18683, b<sub>1</sub><sup>+</sup> at 669.28296, y<sub>12</sub><sup>+</sup> at 777.39252, y<sub>4</sub><sup>+</sup> at 843.41864, b<sub>1</sub><sup>+</sup>-H<sub>2</sub>O at 864.38446, b<sub>1</sub><sup>+</sup>-H<sub>2</sub>O at 977.47015, b<sub>10</sub><sup>+</sup> at 1108.56335, and y<sub>11</sub><sup>+</sup> at 1424.73792.</p>                                                                                                                                                                            |                           |                               |                                          |       |                    |        |           |            |
| 4503143                                                                                                                                                                                                                                                                                                                                                                                                                                                                                                                                                                                                                                                                                                                                                                                                                                                                                                                                                                                                                                                                     | cathepsin D               | GSLSYLnVTR                    | N7(Deamidated)                           | 3.02  | 0                  | 2      | 555.79346 | 1110.57964 |
| <p>Extracted from: D:\VTanMS\data\Piama_mike\Glyco_8.raw #19786 RT: 39.83<br/>FTMS, HCD@30.00, z=+2, Mono m/z=555.79303 Da, MH+=1110.57878 Da, Match Tol.=0.02 Da</p>  <p>Mass spectrum showing intensity (counts) on the y-axis (0 to 40) and m/z on the x-axis (0 to 800). The base peak is at m/z 375.23533 (y<sub>5</sub><sup>+</sup>). Other significant peaks include y<sub>2</sub><sup>+</sup>-NH<sub>3</sub> at 130.08644, y<sub>1</sub><sup>+</sup> at 175.11929, b<sub>1</sub><sup>+</sup>-H<sub>2</sub>O at 240.13434, y<sub>2</sub><sup>+</sup>-NH<sub>3</sub> at 259.1391, y<sub>2</sub><sup>+</sup> at 276.16718, b<sub>1</sub><sup>+</sup>-H<sub>2</sub>O at 327.16714, b<sub>1</sub><sup>+</sup> at 345.17734, y<sub>1</sub><sup>+</sup> at 490.26410, b<sub>1</sub><sup>+</sup> at 508.23560, y<sub>5</sub><sup>+</sup> at 603.34717, y<sub>6</sub><sup>+</sup> at 766.41144, and y<sub>7</sub><sup>+</sup> at 833.44086.</p>                                            |                           |                               |                                          |       |                    |        |           |            |
| 4503689                                                                                                                                                                                                                                                                                                                                                                                                                                                                                                                                                                                                                                                                                                                                                                                                                                                                                                                                                                                                                                                                     | fibrinogen alpha chain    | mDGSLNFnR                     | M1(Oxidation);<br>N8(Deamidated)         | 2.88  | 0                  | 2      | 535.73218 | 1070.45708 |
| <p>Extracted from: D:\VTanMS\data\Piama_mike\Glyco_19.raw #7141 RT: 28.47<br/>FTMS, HCD@30.00, z=+2, Mono m/z=535.73114 Da, MH+=1070.45500 Da, Match Tol.=0.02 Da</p>  <p>Mass spectrum showing intensity (counts) on the y-axis (0 to 140) and m/z on the x-axis (0 to 900). The base peak is at m/z 290.14612 (y<sub>2</sub><sup>+</sup>). Other significant peaks include y<sub>1</sub><sup>+</sup>-NH<sub>3</sub> at 158.09236, y<sub>1</sub><sup>+</sup> at 175.11914, b<sub>2</sub><sup>+</sup> at 263.06989, b<sub>1</sub><sup>+</sup> at 320.09048, b<sub>1</sub><sup>+</sup>-H<sub>2</sub>O at 389.11307, y<sub>1</sub><sup>+</sup>-NH<sub>3</sub> at 420.18397, y<sub>1</sub><sup>+</sup> at 437.21414, y<sub>1</sub><sup>+</sup>-NH<sub>3</sub> at 534.23169, y<sub>4</sub><sup>+</sup> at 551.25787, y<sub>5</sub><sup>+</sup> at 664.34161, y<sub>6</sub><sup>+</sup> at 751.37347, y<sub>7</sub><sup>+</sup> at 808.39551, and y<sub>8</sub><sup>+</sup> at 923.42041.</p> |                           |                               |                                          |       |                    |        |           |            |

|                                                                                                                                                                                                                                                           |                                            |                     |                                                           |      |   |   |           |            |
|-----------------------------------------------------------------------------------------------------------------------------------------------------------------------------------------------------------------------------------------------------------|--------------------------------------------|---------------------|-----------------------------------------------------------|------|---|---|-----------|------------|
| 4506115                                                                                                                                                                                                                                                   | vitamin K-dependent protein<br>C           | EVFVHPnYSK          | N7(Deamidated)                                            | 2.17 | 0 | 3 | 407.53632 | 1220.59439 |
| <p>Extracted from: D:\YTIanMS\data\Plasma_mile\Glyco_9.raw #6526 RT: 26.10<br/>FTMS, HCD@30.00, z=+3, Mono m/z=407.53656 Da, MH+=1220.59513 Da, Match Tol.=0.02 Da</p> 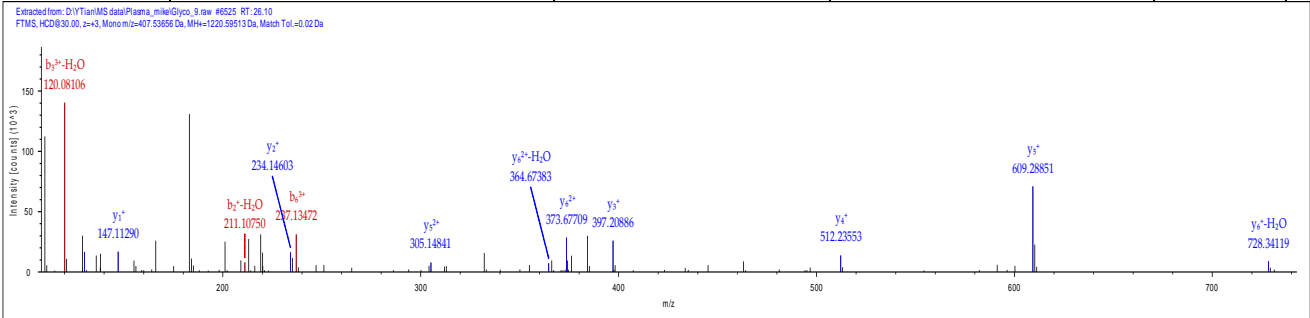  |                                            |                     |                                                           |      |   |   |           |            |
| 4506547                                                                                                                                                                                                                                                   | ribonuclease pancreatic                    | SnSSmHITdCR         | N2(Deamidated);<br>M5(Oxidation);<br>C10(Carbamidomethyl) | 2.46 | 0 | 3 | 442.17999 | 1324.52542 |
| <p>Extracted from: D:\YTIanMS\data\Plasma_mile\Glyco_7.raw #3440 RT: 14.93<br/>FTMS, HCD@30.00, z=+3, Mono m/z=442.17999 Da, MH+=1324.52542 Da, Match Tol.=0.02 Da</p>  |                                            |                     |                                                           |      |   |   |           |            |
| 4507509                                                                                                                                                                                                                                                   | Tissue inhibitor of<br>metalloproteinase 1 | FVGTPEVnQTTLYQ<br>R | N8(Deamidated)                                            | 3.83 | 0 | 2 | 877.44183 | 1753.87639 |

|                                                                                                                                                                                                                                                            |                                                                               |                               |                                                             |      |   |   |           |            |
|------------------------------------------------------------------------------------------------------------------------------------------------------------------------------------------------------------------------------------------------------------|-------------------------------------------------------------------------------|-------------------------------|-------------------------------------------------------------|------|---|---|-----------|------------|
| <p>Extracted from: D:\YiTianMS\data\Plasma_mile\Glyco_18.raw #11861 RT: 44.20<br/>FTMS, HCD@30.00, z=+2, Mono m/z=877.4424 Da, MH+=1753.87700 Da, Match Tol.=0.02 Da</p> 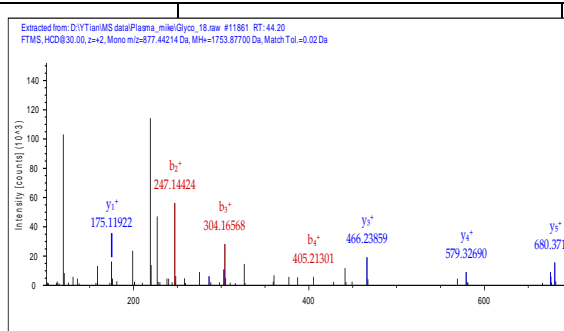   |                                                                               |                               |                                                             |      |   |   |           |            |
| 4507725                                                                                                                                                                                                                                                    | tranthyretin                                                                  | ALGISPFHEHAEEVV<br>FTAnDSGPRR | N18(Deamidated)                                             | 3.28 | 1 | 5 | 522.46729 | 2608.30732 |
| <p>Extracted from: D:\YiTianMS\data\Plasma_mile\Glyco_1.raw #1043 RT: 40.60<br/>FTMS, HCD@30.00, z=+4, Mono m/z=652.83130 Da, MH+=2608.30337 Da, Match Tol.=0.02 Da</p>    |                                                                               |                               |                                                             |      |   |   |           |            |
| 4557389                                                                                                                                                                                                                                                    | complement component C8<br>alpha chain                                        | GGSSGWSGGLAQ<br>nR            | N13(Deamidated)                                             | 3.49 | 0 | 2 | 667.80829 | 1334.60930 |
| <p>Extracted from: D:\YiTianMS\data\Plasma_mile\Glyco_6.raw #7307 RT: 28.49<br/>FTMS, HCD@30.00, z=+2, Mono m/z=687.80798 Da, MH+=1334.60889 Da, Match Tol.=0.02 Da</p>  |                                                                               |                               |                                                             |      |   |   |           |            |
| 4826772                                                                                                                                                                                                                                                    | insulin-like growth factor-<br>binding protein complex acid<br>labile subunit | AGAFGLLTNVAVm<br>nLSGNcLR     | M13(Oxidation);<br>N14(Deamidated);<br>C19(Carbamidomethyl) | 4.34 | 0 | 3 | 732.37018 | 2195.09598 |

|                                                                                                                                                                                                                                                              |                                                        |                           |                                         |      |   |   |           |            |
|--------------------------------------------------------------------------------------------------------------------------------------------------------------------------------------------------------------------------------------------------------------|--------------------------------------------------------|---------------------------|-----------------------------------------|------|---|---|-----------|------------|
| <p>Extracted from: D:\YTian\MS data\Plasma_mile\Glyco_9.raw #20370 RT: 68.29<br/>FTMS, HCD@30.00, z=+3, Mono m/z=732.37018 Da, MH+2195.09598 Da, Match Tol.=0.02 Da</p> 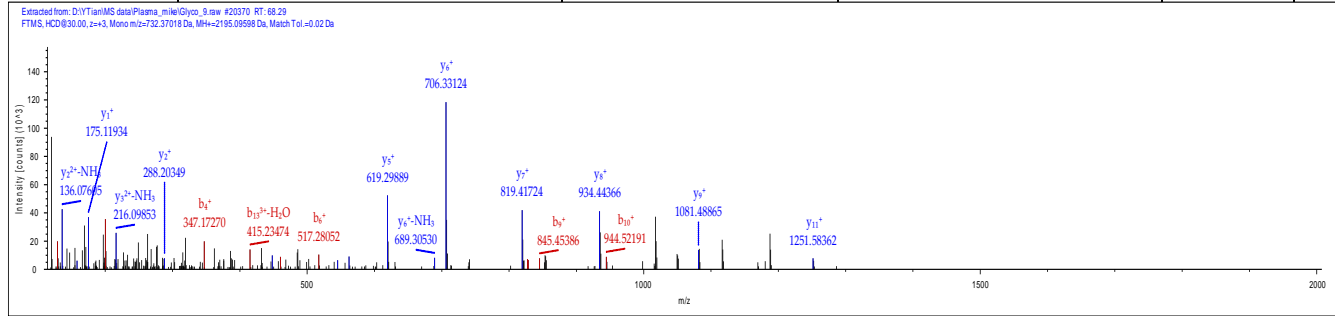    |                                                        |                           |                                         |      |   |   |           |            |
| 5031795                                                                                                                                                                                                                                                      | inhibin beta C chain                                   | EQEcEIISFAETGLS<br>TInQTR | C4(Carbamidomethyl);<br>N18(Deamidated) | 3.34 | 0 | 3 | 809.71857 | 2427.14115 |
| <p>Extracted from: D:\YTian\MS data\Plasma_mile\Glyco_1.raw #21958 RT: 73.46<br/>FTMS, HCD@30.00, z=+2, Mono m/z=1214.06828 Da, MH+2427.12529 Da, Match Tol.=0.02 Da</p>    |                                                        |                           |                                         |      |   |   |           |            |
| 5730075                                                                                                                                                                                                                                                      | fibroleukin                                            | VAnLTFVVNSLDGK            | N3(Deamidated)                          | 4.06 | 0 | 2 | 739.39972 | 1477.79216 |
| <p>Extracted from: D:\YTian\MS data\Plasma_mile\Glyco_12.raw #17892 RT: 61.77<br/>FTMS, HCD@30.00, z=+2, Mono m/z=736.39972 Da, MH+1477.79216 Da, Match Tol.=0.02 Da</p>  |                                                        |                           |                                         |      |   |   |           |            |
| 10835071                                                                                                                                                                                                                                                     | HLA class II histocompatibility<br>antigen gamma chain | YGnmTEDHVmHLL<br>QNADPLK  | N3(Deamidated);<br>M4(Oxidation);       | 1.92 | 0 | 4 | 590.52246 | 2359.06801 |

|          |                                                                                                                                                                            |                                  |                                                                                |      |   |   |           |            |
|----------|----------------------------------------------------------------------------------------------------------------------------------------------------------------------------|----------------------------------|--------------------------------------------------------------------------------|------|---|---|-----------|------------|
|          |                                                                                                                                                                            |                                  | M10(Oxidation)                                                                 |      |   |   |           |            |
|          | <p>Extracted from: D:\YTian\MS data\Plasma_mile\Glyco_18.raw #13297 RT: 48.65<br/> FTMS, HCD@30.00, z=+4, Mono m/z=590.52249 Da, MH+=2359.06801 Da, Match Tol.=0.02 Da</p> |                                  |                                                                                |      |   |   |           |            |
| 11342670 | azurocidin                                                                                                                                                                 | FVnVTVTPEDQcRP<br>NNVcTGVLTTR    | N3(Deamidated);<br>C12(Carbamidomethyl);<br>C18(Carbamidomethyl)               | 2.62 | 0 | 3 | 926.44958 | 2777.33420 |
|          | <p>Extracted from: D:\YTian\MS data\Plasma_mile\Glyco_12.raw #12753 RT: 45.95<br/> FTMS, HCD@30.00, z=+3, Mono m/z=626.44958 Da, MH+=2777.33420 Da, Match Tol.=0.02 Da</p> |                                  |                                                                                |      |   |   |           |            |
| 11386147 | prosaposin                                                                                                                                                                 | TnSTFVQALVEHVK                   | N2(Deamidated)                                                                 | 3.71 | 0 | 3 | 525.28052 | 1573.82700 |
|          | <p>Extracted from: D:\YTian\MS data\Plasma_mile\Glyco_17.raw #15464 RT: 54.56<br/> FTMS, HCD@30.00, z=+3, Mono m/z=525.27875 Da, MH+=1573.82169 Da, Match Tol.=0.02 Da</p> |                                  |                                                                                |      |   |   |           |            |
| 13540563 | complement factor H-related<br>protein 5                                                                                                                                   | EQFcPPPPQIPnAQ<br>nmTTTTVNYQDGEK | C4(Carbamidomethyl);<br>N12(Deamidated);<br>N15(Deamidated);<br>M16(Oxidation) | 2.34 | 0 | 3 | #####     | 3122.39536 |
|          | <p>Extracted from: D:\YTian\MS data\Plasma_mile\Glyco_3.raw #13141 RT: 46.99<br/> FTMS, HCD@30.00, z=+3, Mono m/z=1041.46997 Da, MH+=3122.39536 Da, Match Tol.=0.02 Da</p> |                                  |                                                                                |      |   |   |           |            |

|          |                      |                         |                                         |      |   |   |           |            |
|----------|----------------------|-------------------------|-----------------------------------------|------|---|---|-----------|------------|
|          |                      |                         |                                         |      |   |   |           |            |
| 13899338 | inhibin beta E chain | LQLDcRPLEGnSTV<br>TGQPR | C5(Carbamidomethyl);<br>N11(Deamidated) | 2.68 | 0 | 3 | 714.69257 | 2142.06314 |

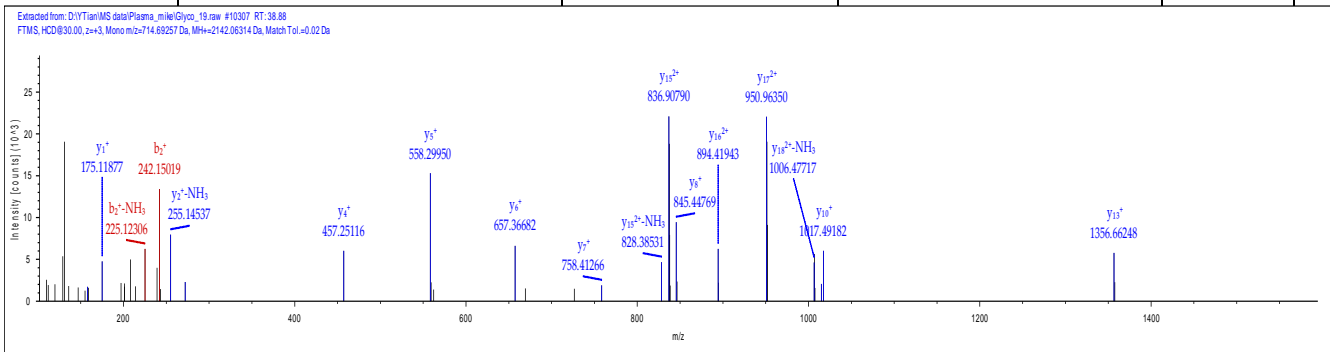

|          |                                                               |                       |                                        |      |   |   |           |            |
|----------|---------------------------------------------------------------|-----------------------|----------------------------------------|------|---|---|-----------|------------|
| 14249738 | N-acetylglucosamine-1-<br>phosphotransferase subunit<br>gamma | YEFcPFHnVTQHEQ<br>TFR | C4(Carbamidomethyl);<br>N8(Deamidated) | 3.00 | 0 | 4 | 561.00189 | 2240.98574 |
|----------|---------------------------------------------------------------|-----------------------|----------------------------------------|------|---|---|-----------|------------|

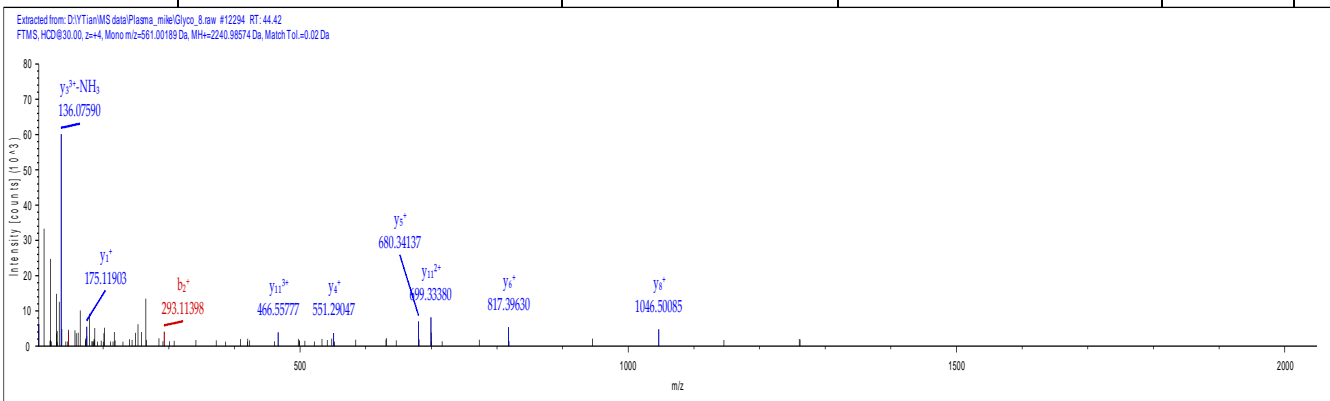

|                                                                                                                                                                        |                                          |                         |                                  |      |   |   |           |            |
|------------------------------------------------------------------------------------------------------------------------------------------------------------------------|------------------------------------------|-------------------------|----------------------------------|------|---|---|-----------|------------|
| 21071039                                                                                                                                                               | beta-Ala-His dipeptidase                 | LVPHmVSAVEK             | M5(Oxidation);<br>N6(Deamidated) | 2.86 | 0 | 3 | 447.56766 | 1340.68842 |
| <p>Extracted from: D:\TianMS data\Plasma_mile\Glyco_5.raw #5432 RT: 22.35<br/>FTMS, HCD@30.00, z=+3, Mono m/z=47.56778 Da, MH+=1340.68879 Da, Match Tol.=0.02 Da</p>   |                                          |                         |                                  |      |   |   |           |            |
| 23111005                                                                                                                                                               | microfibril-associated<br>glycoprotein 4 | VDLEDFEnNTAYAK          | N8(Deamidated)                   | 3.57 | 0 | 2 | 815.36792 | 1629.72856 |
| <p>Extracted from: D:\TianMS data\Plasma_mile\Glyco_5.raw #14030 RT: 49.62<br/>FTMS, HCD@30.00, z=+2, Mono m/z=815.36792 Da, MH+=1629.72856 Da, Match Tol.=0.02 Da</p> |                                          |                         |                                  |      |   |   |           |            |
| 27436940                                                                                                                                                               | reelin                                   | APSnVSTIIHILYLPE<br>DAK | N4(Deamidated)                   | 2.18 | 0 | 3 | 694.70941 | 2082.11368 |
| <p>Extracted from: D:\TianMS data\Plasma_mile\Glyco_2.raw #19764 RT: 67.68<br/>FTMS, HCD@30.00, z=+3, Mono m/z=694.70941 Da, MH+=2082.11368 Da, Match Tol.=0.02 Da</p> |                                          |                         |                                  |      |   |   |           |            |
| 27477039                                                                                                                                                               | ICOS ligand                              | TVVTYHIPQnSSLE<br>NVDSR | N10(Deamidated)                  | 2.15 | 0 | 3 | 720.69153 | 2160.06003 |

Extracted from: D:\YitianMS data\Plasma\_mile\Glyco\_3.raw #10907 RT: 41.43  
 FTMS, HCD@30.00, z=+3, Mono m/z=720.68719 Da, MH+=2160.04703 Da, Match Tol.=0.02 Da

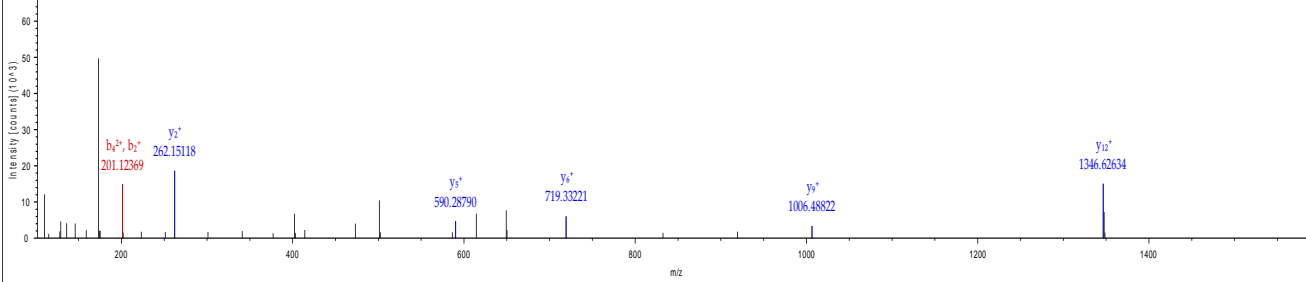

29788996

serum  
paraoxonase/lactonase 3

VSTVYANnGSVLQ  
GTSVASVYHGK

N8(Deamidated)

3.77

0

3

813.74396

2439.21732

Extracted from: D:\YitianMS data\Plasma\_mile\Glyco\_13.raw #11981 RT: 44.61  
 FTMS, HCD@30.00, z=+3, Mono m/z=814.07715 Da, MH+=2440.21689 Da, Match Tol.=0.02 Da

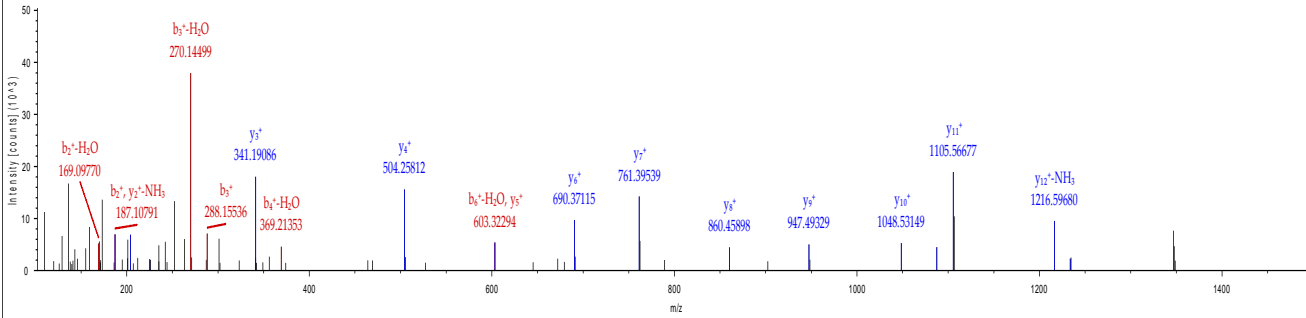

31559825

polycystic kidney disease  
protein 1-like 3

WWIGQNVMLPKKH  
QDnK

N16(Deamidated)

1.76

2

4

531.53058

2123.10048



|                                                                                                                                                                                                                                                           |                                    |                      |                                 |      |   |   |           |            |
|-----------------------------------------------------------------------------------------------------------------------------------------------------------------------------------------------------------------------------------------------------------|------------------------------------|----------------------|---------------------------------|------|---|---|-----------|------------|
| <p>Extracted from: D:\VTanMS\data\Plasma_msk\Glyco_10.raw #17182 RT: 61.05<br/>FTMS, HCD@30.00, z=+4, Mono m/z=531.53058 Da, MH+=2123.10048 Da, Match Tol.=0.02 Da</p> 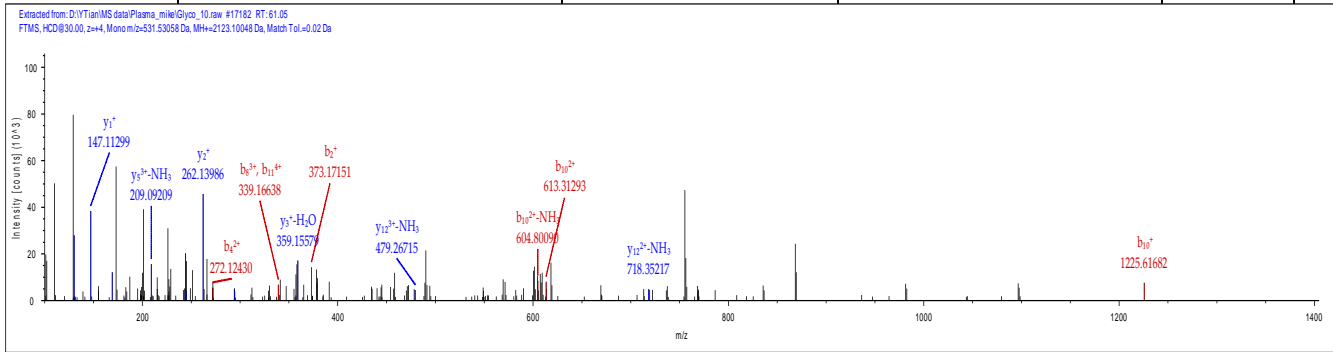  |                                    |                      |                                 |      |   |   |           |            |
| 31652249                                                                                                                                                                                                                                                  | lipopolysaccharide-binding protein | LSVATnVSATLTFn TSK   | N6(Deamidated); N14(Deamidated) | 3.99 | 0 | 2 | 878.45416 | 1755.90105 |
| <p>Extracted from: D:\VTanMS\data\Plasma_msk\Glyco_7.raw #18922 RT: 64.31<br/>FTMS, HCD@30.00, z=+2, Mono m/z=875.45416 Da, MH+=1755.90105 Da, Match Tol.=0.02 Da</p>    |                                    |                      |                                 |      |   |   |           |            |
| 32171249                                                                                                                                                                                                                                                  | prostaglandin-H2 D-isomerase       | SVVAPATDGGLnLT STFLR | N12(Deamidated)                 | 4.96 | 0 | 3 | 640.67468 | 1920.00949 |
| <p>Extracted from: D:\VTanMS\data\Plasma_msk\Glyco_3.raw #17899 RT: 63.79<br/>FTMS, HCD@30.00, z=+3, Mono m/z=640.67450 Da, MH+=1920.00895 Da, Match Tol.=0.02 Da</p>  |                                    |                      |                                 |      |   |   |           |            |
| 32313593                                                                                                                                                                                                                                                  | olfactomedin-4                     | LLnLTVR              | N3(Deamidated)                  | 2.06 | 0 | 2 | 415.26065 | 829.51402  |

|                                                                                                                                                                                                                                                           |                                                |                       |                                        |      |   |   |           |            |
|-----------------------------------------------------------------------------------------------------------------------------------------------------------------------------------------------------------------------------------------------------------|------------------------------------------------|-----------------------|----------------------------------------|------|---|---|-----------|------------|
| <p>Extracted from: D:\Tian\MS data\Plasma_mike\Glyco_12.raw #11020 RT: 40.63<br/>FTMS, HCD@30.00, z=2, Mono m/z=415.26065 Da, MH+=829.51402 Da, Match Tol.=0.02 Da</p> 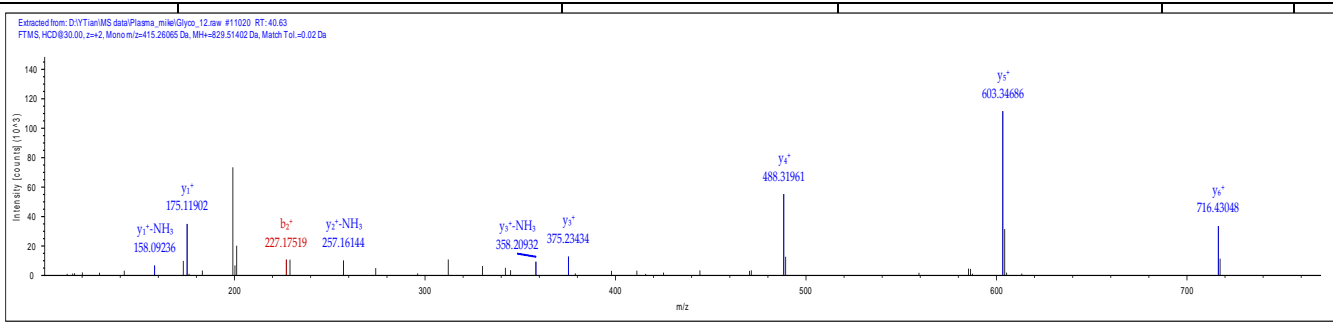   |                                                |                       |                                        |      |   |   |           |            |
| 34734068                                                                                                                                                                                                                                                  | fibulin-1                                      | cATPHGDnASLEAT<br>FVK | C1(Carbamidomethyl);<br>N8(Deamidated) | 3.29 | 0 | 3 | 606.94971 | 1818.83457 |
| <p>Extracted from: D:\Tian\MS data\Plasma_mike\Glyco_11.raw #9385 RT: 36.27<br/>FTMS, HCD@30.00, z=3, Mono m/z=606.94963 Da, MH+=1818.83493 Da, Match Tol.=0.02 Da</p>   |                                                |                       |                                        |      |   |   |           |            |
| 38016947                                                                                                                                                                                                                                                  | complement C5                                  | YnFSFR                | N2(Deamidated)                         | 1.78 | 0 | 2 | 417.69257 | 834.37786  |
| <p>Extracted from: D:\Tian\MS data\Plasma_mike\Glyco_18.raw #11170 RT: 41.96<br/>FTMS, HCD@30.00, z=2, Mono m/z=417.93251 Da, MH+=834.37634 Da, Match Tol.=0.02 Da</p>  |                                                |                       |                                        |      |   |   |           |            |
| 38455402                                                                                                                                                                                                                                                  | neutrophil gelatinase-<br>associated lipocalin | SYnVTSVLFR            | N3(Deamidated)                         | 2.80 | 0 | 2 | 593.80896 | 1186.61064 |

|                                                                                                                                                                                                                                                             |                                   |                            |                |      |   |   |           |            |
|-------------------------------------------------------------------------------------------------------------------------------------------------------------------------------------------------------------------------------------------------------------|-----------------------------------|----------------------------|----------------|------|---|---|-----------|------------|
| <p>Extracted from: D:\VTianMS data\Plasma_msk\Glyco_12.raw #15822 RT: 55.30<br/>FTMS, HCD@30.00, z=+2, Mono m/z=593.80933 Da, MH+=1186.61138 Da, Match Tol.=0.02 Da</p> 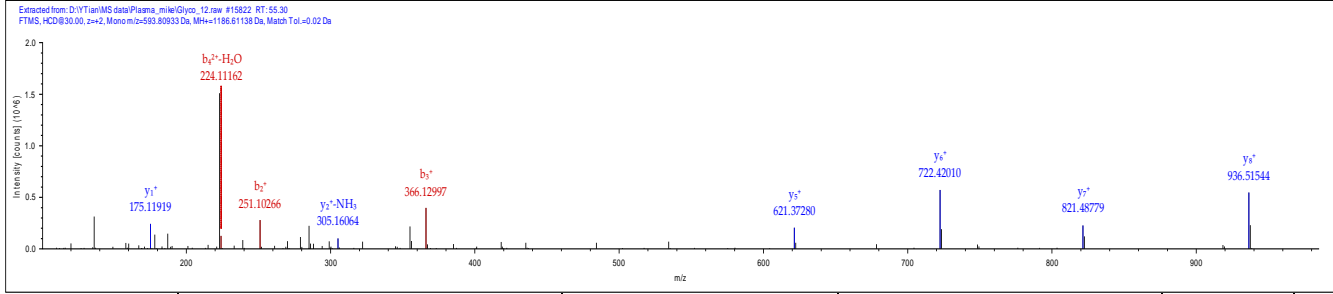   |                                   |                            |                |      |   |   |           |            |
| 39725934                                                                                                                                                                                                                                                    | pigment epithelium-derived factor | VTQnLTLIEESLTSE<br>FIHDIDR | N4(Deamidated) | 6.13 | 0 | 3 | 858.76593 | 2574.28324 |
| <p>Extracted from: D:\VTianMS data\Plasma_msk\Glyco_7.raw #24804 RT: 61.27<br/>FTMS, HCD@30.00, z=+2, Mono m/z=1287.64856 Da, MH+=2574.28894 Da, Match Tol.=0.02 Da</p>    |                                   |                            |                |      |   |   |           |            |
| 39777608                                                                                                                                                                                                                                                    | semaphorin-4B                     | FEAEHISnYTALLS<br>R        | N8(Deamidated) | 3.62 | 0 | 3 | 622.32031 | 1864.94638 |
| <p>Extracted from: D:\VTianMS data\Plasma_msk\Glyco_17.raw #17597 RT: 61.03<br/>FTMS, HCD@30.00, z=+3, Mono m/z=822.31488 Da, MH+=1864.93009 Da, Match Tol.=0.02 Da</p>  |                                   |                            |                |      |   |   |           |            |
| 40317626                                                                                                                                                                                                                                                    | thrombospondin-1                  | VVnSTTGPGEHLR              | N3(Deamidated) | 3.69 | 0 | 3 | 456.56845 | 1367.69080 |

Extracted from: D:\YTan\MS data\Plasma\_mike\Glyco\_18.raw #4568 RT: 19.31  
 FTMS, HCD@30.00, z=+3, Mono(m/z)=456.56943 Da, MH+=1367.69373 Da, Match Tol.=0.02 Da

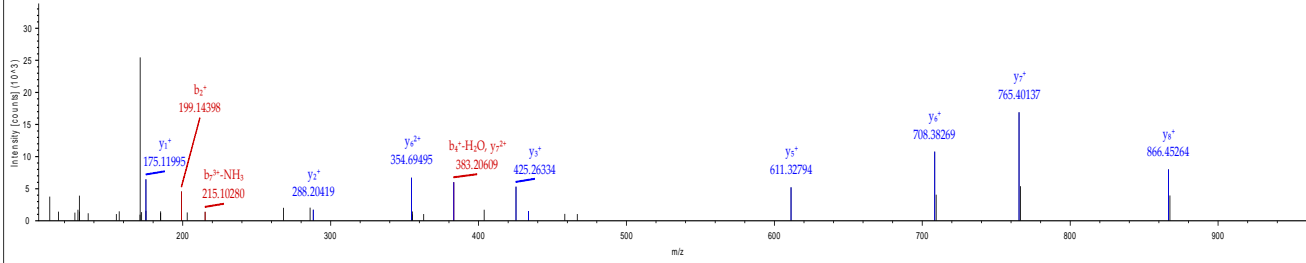

48255943

CD44 antigen

AFnSTLPTmAQmE  
K

N3(Deamidated);  
M9(Oxidation);

1.90

0

2

801.36292

1601.71855

Extracted from: D:\YTan\MS data\Plasma\_mike\Glyco\_20.raw #4426 RT: 32.80  
 FTMS, HCD@30.00, z=+2, Mono(m/z)=801.36303 Da, MH+=1601.72038 Da, Match Tol.=0.02 Da

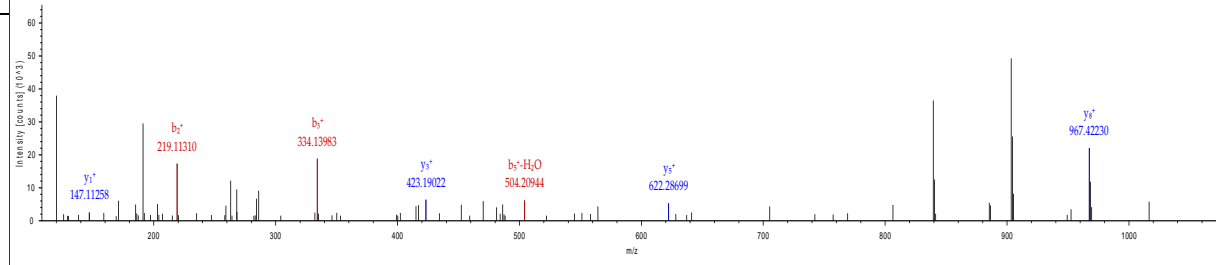

52353294

olfactory receptor 8H3

DQVAPVFYTIVIPM  
LNPLIYSLRnR

N24(Deamidated)

2.15

1

3

978.53705

2933.59659

Extracted from: D:\YTan\MS data\Plasma\_mike\Glyco\_16.raw #2223 RT: 73.95  
 FTMS, HCD@30.00, z=+3, Mono(m/z)=978.53705 Da, MH+=2933.59659 Da, Match Tol.=0.02 Da

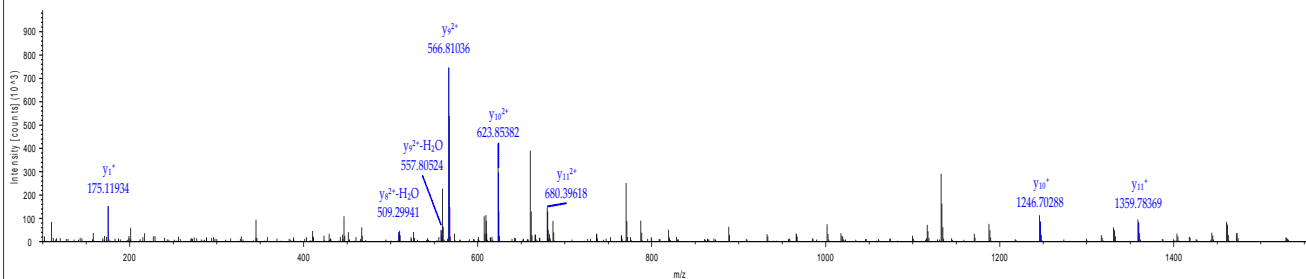

|                                                                                                                                                                      |                                      |                            |                |      |   |   |           |            |
|----------------------------------------------------------------------------------------------------------------------------------------------------------------------|--------------------------------------|----------------------------|----------------|------|---|---|-----------|------------|
| 56788359                                                                                                                                                             | ADAMTS-like protein 4                | LVSGnLTDR                  | N5(Deamidated) | 2.07 | 0 | 2 | 488.25943 | 975.51158  |
| <p>Extracted from: D:\TianMS data\Plasma_milk\Glyco_20.ms #6137 RT: 24.98<br/>FTMS, HCD@30.00, z=2, Mono m/z=488.25943 Da, MH+=975.51158 Da, Match Tol.=0.02 Da</p>  |                                      |                            |                |      |   |   |           |            |
| 61744483                                                                                                                                                             | 4F2 cell-surface antigen heavy chain | LLIAGTnSSDLQQIL<br>SLLESNK | N7(Deamidated) | 3.43 | 0 | 3 | 786.76276 | 2358.27372 |
| <p>Extracted from: D:\TianMS data\Plasma_milk\Glyco_1.ms #25859 RT: 36.35<br/>FTMS, HCD@30.00, z=3, Mono m/z=786.76276 Da, MH+=2358.27372 Da, Match Tol.=0.02 Da</p> |                                      |                            |                |      |   |   |           |            |
| 66346698                                                                                                                                                             | alpha-N-acetylglucosaminidase        | VFPQVnVTK                  | N6(Deamidated) | 1.64 | 0 | 2 | 516.79108 | 1032.57488 |

Extracted from: D:\VTian\MS data\Plasma\_mile\Glyco\_13.raw #9418 RT: 36.19  
 FTMS, HCD@30.00, z=+2, Mono m/z=516.79108 Da, MH+=1032.57488 Da, Match Tol.=0.02 Da

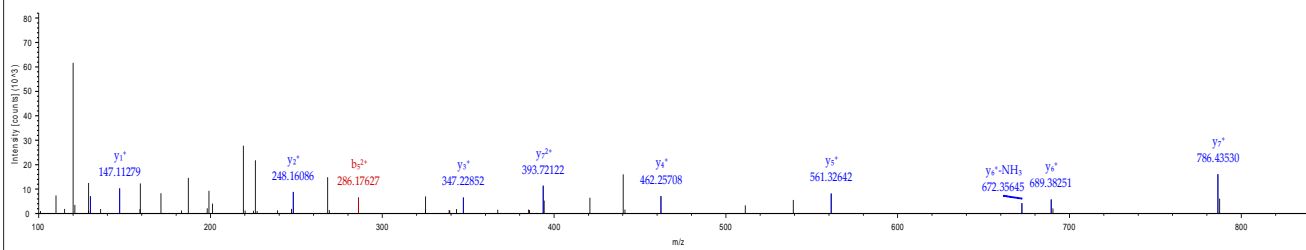

66864913

neuropilin-1

RGPEcSQnYTTPS  
GVIK

C5(Carbamidomethyl);  
N8(Deamidated)

2.70

1

3

632.30426

1894.89823

Extracted from: D:\VTian\MS data\Plasma\_mile\Glyco\_20.raw #7187 RT: 28.59  
 FTMS, HCD@30.00, z=+3, Mono m/z=632.30426 Da, MH+=1894.89823 Da, Match Tol.=0.02 Da

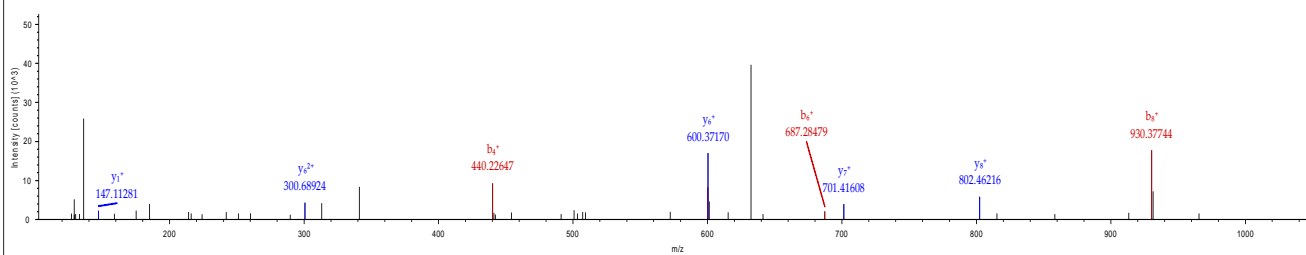

68161541

carcinoembryonic antigen-  
related cell adhesion  
molecule 1

LSQGnTTLsINPVK

N5(Deamidated)

3.07

0

2

736.90094

1472.79460

Extracted from: D:\VTian\MS data\Plasma\_mile\Glyco\_18.raw #10197 RT: 38.83  
 FTMS, HCD@30.00, z=+2, Mono m/z=736.90112 Da, MH+=1472.79460 Da, Match Tol.=0.02 Da

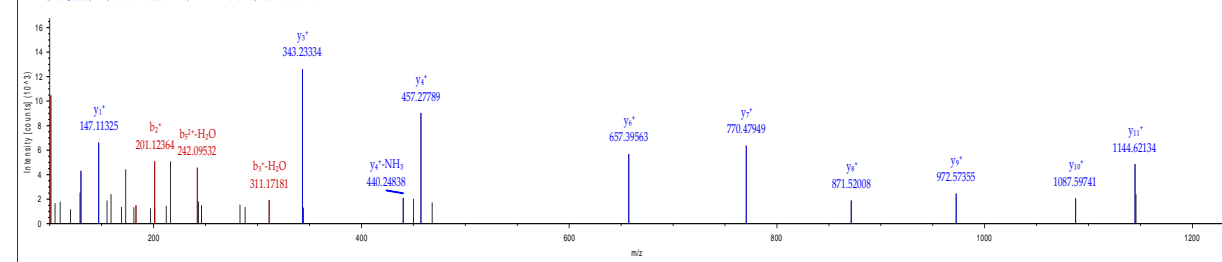

|                                                                                                                                                                           |                                              |                       |                                  |      |   |   |           |            |
|---------------------------------------------------------------------------------------------------------------------------------------------------------------------------|----------------------------------------------|-----------------------|----------------------------------|------|---|---|-----------|------------|
| 70778918                                                                                                                                                                  | inter-alpha-trypsin inhibitor heavy chain H2 | GAFISnFSmTVDGK        | N6(Deamidated);<br>M9(Oxidation) | 3.03 | 0 | 2 | 745.84607 | 1490.68486 |
| <p>Extracted from: D:\YTian\MS data\Plasma_mile\Glyco_15.saw #13003 RT: 47.76<br/>FTMS, HCD@30.00, z=+2, Mono m/z=745.84601 Da, MH+=1490.68474 Da, Match Tol.=0.02 Da</p> |                                              |                       |                                  |      |   |   |           |            |
| 74027261                                                                                                                                                                  | serine protease inhibitor Kazal-type 5       | ENDPVHGADGKIFY<br>TnK | N15(Deamidated)                  | 1.85 | 1 | 4 | 448.95868 | 1792.81289 |
| <p>Extracted from: D:\YTian\MS data\Plasma_mile\Glyco_17.saw #16769 RT: 58.58<br/>FTMS, HCD@30.00, z=+4, Mono m/z=448.95868 Da, MH+=1792.81289 Da, Match Tol.=0.02 Da</p> |                                              |                       |                                  |      |   |   |           |            |
| 88702793                                                                                                                                                                  | vasorin                                      | LHEITnETFR            | N6(Deamidated)                   | 3.11 | 0 | 3 | 420.87878 | 1260.62180 |

|           |                           |                           |                                                       |      |   |   |           |            |
|-----------|---------------------------|---------------------------|-------------------------------------------------------|------|---|---|-----------|------------|
|           |                           |                           |                                                       |      |   |   |           |            |
|           |                           |                           |                                                       |      |   |   |           |            |
| 115298678 | complement C3             | TVLTPATnHmGnVT<br>FTIPANR | N8(Deamidated);<br>M10(Oxidation);<br>N12(Deamidated) | 4.12 | 0 | 3 | 758.38007 | 2273.12564 |
|           |                           |                           |                                                       |      |   |   |           |            |
| 116534900 | dopamine beta-hydroxylase | SLEAlnGSQLmGL<br>QR       | N6(Deamidated);<br>M12(Oxidation)                     | 3.06 | 0 | 2 | 845.92657 | 1690.84587 |
|           |                           |                           |                                                       |      |   |   |           |            |

Extracted from: D:\YTian\MS data\Plasma\_mile\Glyco\_1.raw #7349 RT: 28.74  
FTMS, HCD@30.00, z=+3, Mono m/z=420.87900 Da, MH+=1260.62244 Da, Match Tol.=0.02 Da

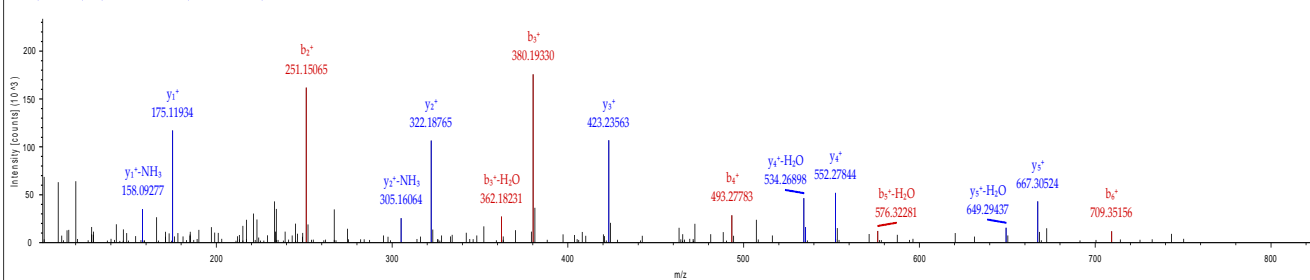

Extracted from: D:\YTian\MS data\Plasma\_mile\Glyco\_5.raw #15278 RT: 63.65  
FTMS, HCD@30.00, z=+3, Mono m/z=772.38654 Da, MH+=2315.14565 Da, Match Tol.=0.02 Da

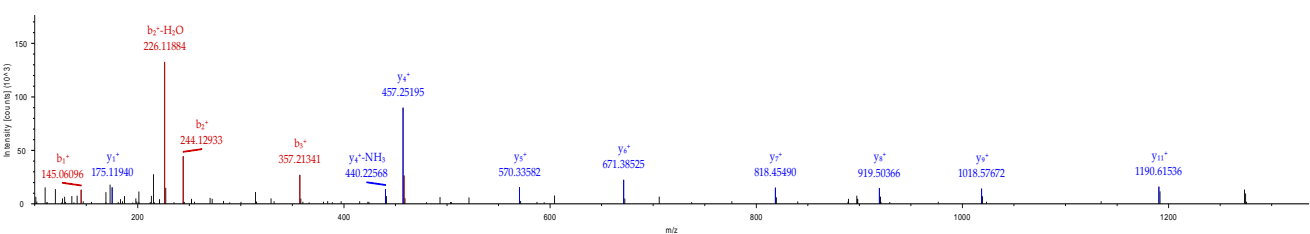

Extracted from: D:\YTian\MS data\Plasma\_mile\Glyco\_8.raw #12121 RT: 43.93  
FTMS, HCD@30.00, z=+2, Mono m/z=445.92557 Da, MH+=1980.84587 Da, Match Tol.=0.02 Da

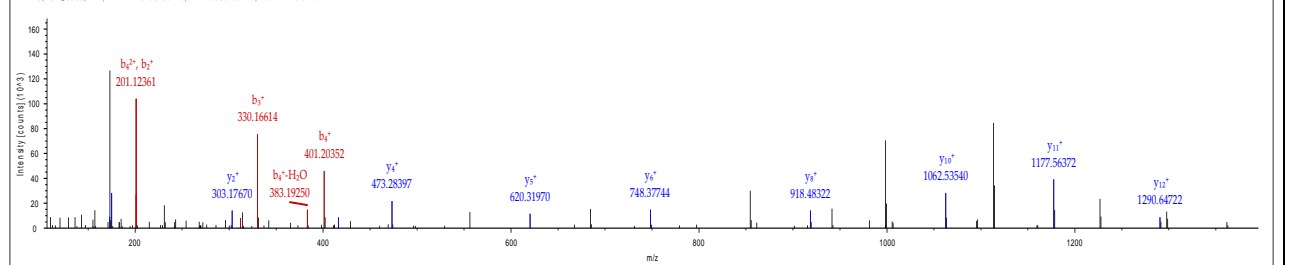



|                                                                                                                                                                                                                                                              |                                                       |                      |                                                            |      |   |   |           |            |
|--------------------------------------------------------------------------------------------------------------------------------------------------------------------------------------------------------------------------------------------------------------|-------------------------------------------------------|----------------------|------------------------------------------------------------|------|---|---|-----------|------------|
| 117320518                                                                                                                                                                                                                                                    | complement factor H-related protein 4                 | LGYNAnTSVLSFQA VcR   | N4(Deamidated);<br>N6(Deamidated);<br>C16(Carbamidomethyl) | 2.25 | 0 | 2 | 951.46356 | 1901.91985 |
| <p>Extracted from: D:\YTian\MS data\Plasma_milk\Glyco_7.ms #15650 RT: 54.62<br/>FTMS, HCD@30.00, z=+2, Mono m/z=951.46356 Da, MH+1901.91985 Da, Match Tol.=0.02 Da</p> 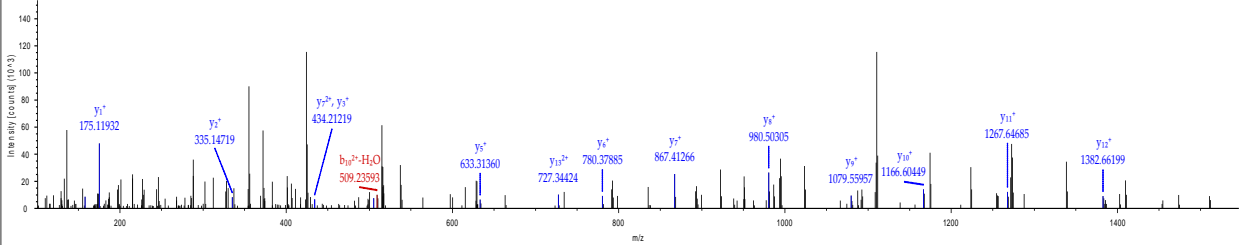    |                                                       |                      |                                                            |      |   |   |           |            |
| 118582275                                                                                                                                                                                                                                                    | extracellular superoxide dismutase                    | LDAFFALEGFPTEP nSSSR | N15(Deamidated)                                            | 1.89 | 0 | 2 | #####     | 2085.96733 |
| <p>Extracted from: D:\YTian\MS data\Plasma_milk\Glyco_18.ms #20701 RT: 71.65<br/>FTMS, HCD@30.00, z=+2, Mono m/z=1043.48730 Da, MH+2085.96733 Da, Match Tol.=0.02 Da</p>  |                                                       |                      |                                                            |      |   |   |           |            |
| 126012562                                                                                                                                                                                                                                                    | prolow-density lipoprotein receptor-related protein 1 | FnSTEYQVVTR          | N2(Deamidated)                                             | 2.29 | 0 | 2 | 672.82471 | 1344.64214 |

|           |                                                                                                                                                                                                                                                               |               |                                    |      |   |   |           |            |
|-----------|---------------------------------------------------------------------------------------------------------------------------------------------------------------------------------------------------------------------------------------------------------------|---------------|------------------------------------|------|---|---|-----------|------------|
|           | <p>Extracted from: D:\YTian\MS data\Plasma_mile\Glyco_19.raw #9629 RT: 36.71<br/>FTMS, HCD@30.00, z=+2, Mono m/z=672.82471 Da, MH+=1344.64214 Da, Match Tol.=0.02 Da</p> 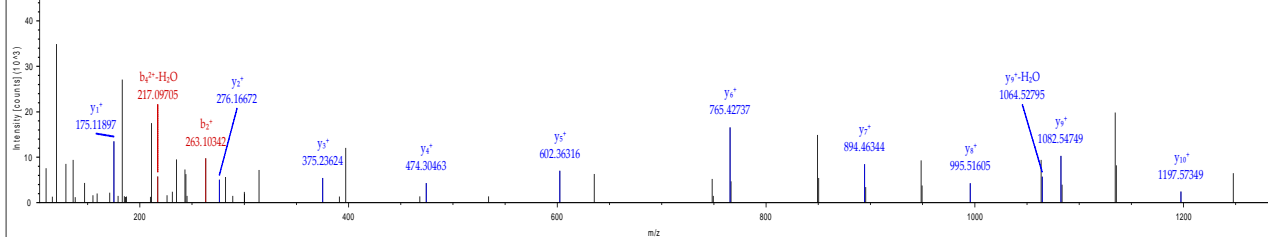   |               |                                    |      |   |   |           |            |
| 134288859 | glycosyltransferase 6 domain-containing protein 1                                                                                                                                                                                                             | NGLnSTYEKHLnK | N4(Deamidated);<br>N12(Deamidated) | 1.86 | 1 | 3 | 507.24973 | 1519.73462 |
|           | <p>Extracted from: D:\YTian\MS data\Plasma_mile\Glyco_7.raw #8925 RT: 34.08<br/>FTMS, HCD@30.00, z=+3, Mono m/z=507.24973 Da, MH+=1519.73462 Da, Match Tol.=0.02 Da</p>     |               |                                    |      |   |   |           |            |
| 144922720 | coiled-coil domain-containing protein 15                                                                                                                                                                                                                      | nQQPASFmR     | N1(Deamidated);<br>M8(Oxidation)   | 1.70 | 0 | 2 | 548.24811 | 1095.48894 |
|           | <p>Extracted from: D:\YTian\MS data\Plasma_mile\Glyco_7.raw #11126 RT: 41.02<br/>FTMS, HCD@30.00, z=+2, Mono m/z=548.24811 Da, MH+=1095.48894 Da, Match Tol.=0.02 Da</p>  |               |                                    |      |   |   |           |            |

|                                                                                                                                                                                                                                                            |                                                |                         |                                       |      |   |   |           |            |
|------------------------------------------------------------------------------------------------------------------------------------------------------------------------------------------------------------------------------------------------------------|------------------------------------------------|-------------------------|---------------------------------------|------|---|---|-----------|------------|
| 148728160                                                                                                                                                                                                                                                  | receptor-type tyrosine-protein phosphatase eta | IHVAGETDSSNLnV SEPR     | N13(Deamidated)                       | 2.91 | 0 | 3 | 642.64417 | 1925.91794 |
| <p>Extracted from: D:\YTIanMS\data\Plasma_mile\Glyco_1.raw #8266 RT: 31.80<br/>FTMS, HCD@30.00, z=+3, Mono m/z=642.97876 Da, MH+=1926.92173 Da, Match Tol.=0.02 Da</p> 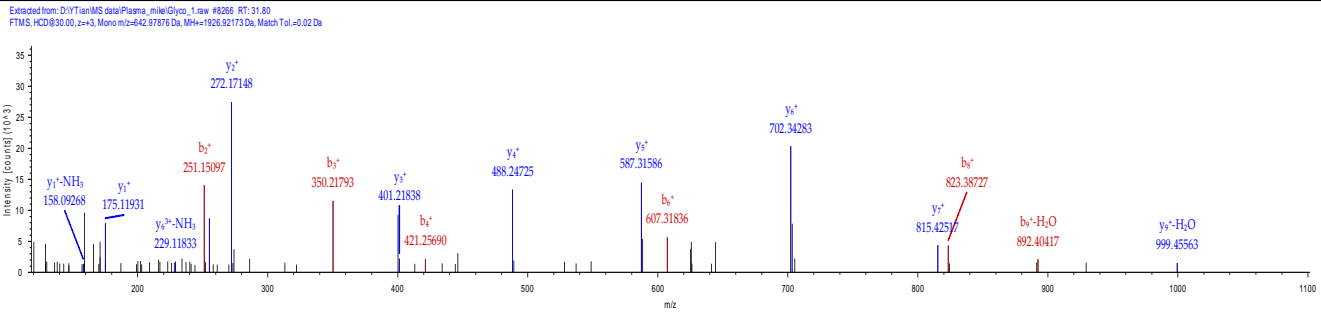   |                                                |                         |                                       |      |   |   |           |            |
| 148762980                                                                                                                                                                                                                                                  | sialic acid-binding Ig-like lectin 14          | SSELTLP RPEDH GTnLTcQVK | N16(Deamidated); C19(Carbamidomethyl) | 3.02 | 0 | 4 | 621.80634 | 2484.20351 |
| <p>Extracted from: D:\YTIanMS\data\Plasma_mile\Glyco_18.raw #9455 RT: 36.40<br/>FTMS, HCD@30.00, z=+4, Mono m/z=621.80634 Da, MH+=2484.20351 Da, Match Tol.=0.02 Da</p>  |                                                |                         |                                       |      |   |   |           |            |
| 149363642                                                                                                                                                                                                                                                  | coiled-coil domain-containing protein 144A     | DLESEISRIKTSQA DFnK     | N17(Deamidated)                       | 1.88 | 2 | 3 | 694.68164 | 2082.03037 |

Extracted from: D:\VTian\MS\data\Plasma\_m\le\Glyco\_7.raw #18271 RT: 62.43  
 FTMS, HCD@30.00, z=+3, Mono m/z=494.68164 Da, MH+=2082.03037 Da, Match Tol.=0.02 Da

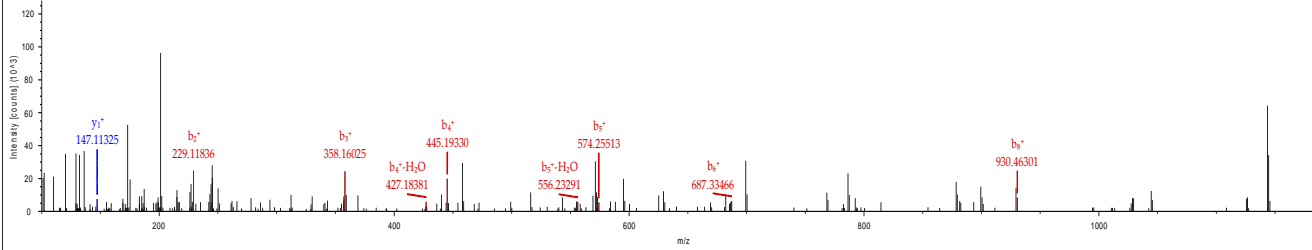

153285408

microsomal triglyceride transfer protein large subunit

TAAAAILLnNnPSYm  
DVK

N9(Deamidated);  
N11(Deamidated);  
M15(Oxidation)

2.01

0

4

481.73633

1923.92348

Extracted from: D:\VTian\MS\data\Plasma\_m\le\Glyco\_2.raw #1710 RT: 28.19  
 FTMS, HCD@30.00, z=+4, Mono m/z=481.73633 Da, MH+=1923.92348 Da, Match Tol.=0.02 Da

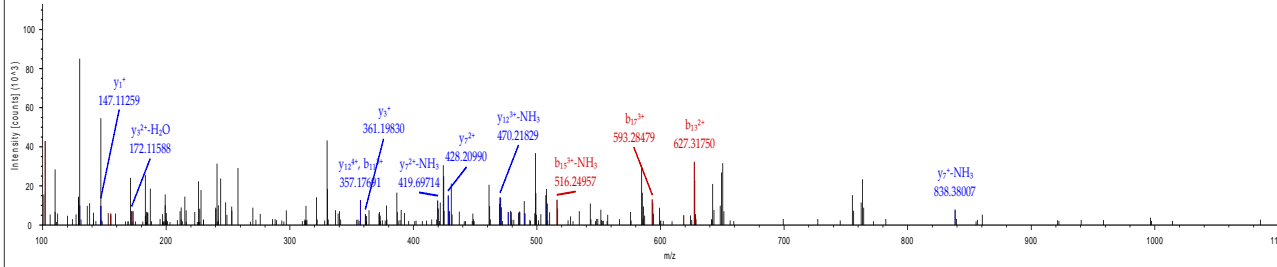

153792110

protein HEG homolog 1

LNnSTGLQSSSVS  
QTK

N3(Deamidated)

1.99

0

2

826.41040

1651.81352

Extracted from: D:\VTian\MS\data\Plasma\_m\le\Glyco\_12.raw #6006 RT: 24.33  
 FTMS, HCD@30.00, z=+2, Mono m/z=826.41040 Da, MH+=1651.81352 Da, Match Tol.=0.02 Da

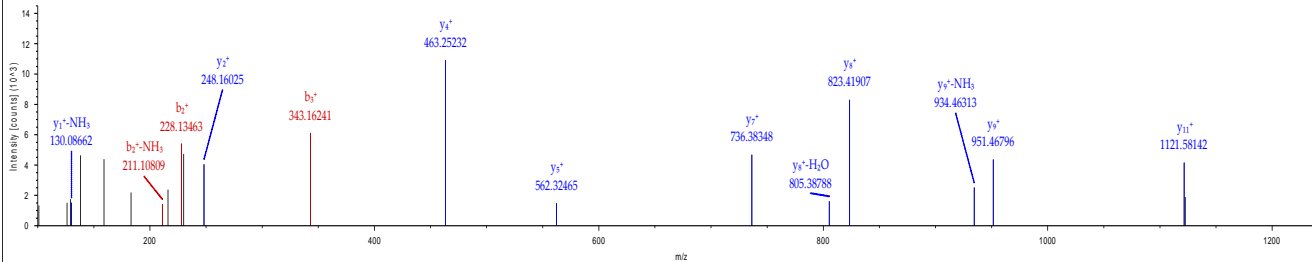

|                                                                                                                                                                                                                                                                                                                                                                                                                                                                                                                                                                                                                                                                                                                                                                                                                                          |                                  |                                 |                 |      |   |   |           |            |
|------------------------------------------------------------------------------------------------------------------------------------------------------------------------------------------------------------------------------------------------------------------------------------------------------------------------------------------------------------------------------------------------------------------------------------------------------------------------------------------------------------------------------------------------------------------------------------------------------------------------------------------------------------------------------------------------------------------------------------------------------------------------------------------------------------------------------------------|----------------------------------|---------------------------------|-----------------|------|---|---|-----------|------------|
| 154146191                                                                                                                                                                                                                                                                                                                                                                                                                                                                                                                                                                                                                                                                                                                                                                                                                                | heat shock protein HSP 90-alpha  | DLVILLYETALLSSG<br>FSLEDPQTHAnR | N26(Deamidated) | 1.85 | 0 | 3 | #####     | 3003.54105 |
| <p>Extracted from: D:\YTian\MS data\Plasma_mike\Glyco_1.raw #28155 RT: 93.32<br/>FTMS, HCD@30.00, z=+3, Mono/mz=1001.52362 Da, MH+=3002.55631 Da, Match Tol.=0.02 Da</p> <p>Mass spectrum showing intensity (counts) versus m/z. The x-axis ranges from 200 to 1800 m/z. The y-axis ranges from 0 to 50 intensity units. The base peak is at m/z 823.41858 (y<sup>2+</sup>). Other labeled peaks include b<sup>2+</sup> (229.11859), b<sup>3+</sup> (328.18677), b<sup>4+</sup> (441.27173), y<sup>1+</sup> (497.23858), b<sup>5+</sup> (554.35510), y<sup>2+</sup> (598.30627), y<sup>3+</sup> (938.42999), y<sup>4+</sup> (1067.48389), y<sup>5+</sup> (1180.57825), y<sup>6+</sup> (1267.59998), and y<sup>7+</sup> (1645.76489).</p>                                                                                                 |                                  |                                 |                 |      |   |   |           |            |
| 189181724                                                                                                                                                                                                                                                                                                                                                                                                                                                                                                                                                                                                                                                                                                                                                                                                                                | proteoglycan 4                   | nGTLVAFR                        | N1(Deamidated)  | 1.92 | 0 | 2 | 439.74036 | 878.47344  |
| <p>Extracted from: D:\YTian\MS data\Plasma_mike\Glyco_1.raw #10079 RT: 37.55<br/>FTMS, HCD@30.00, z=+2, Mono/mz=438.74036 Da, MH+=878.47344 Da, Match Tol.=0.02 Da</p> <p>Mass spectrum showing intensity (counts) versus m/z. The x-axis ranges from 200 to 700 m/z. The y-axis ranges from 0 to 70 intensity units. The base peak is at m/z 492.29337 (y<sup>4+</sup>). Other labeled peaks include y<sup>1+</sup>-NH<sub>3</sub> (158.09241), y<sup>1+</sup> (175.11916), y<sup>2+</sup> (197.12865), b<sup>2+</sup>-H<sub>2</sub>O (256.09296), b<sup>2+</sup> (274.10324), y<sup>2+</sup>-NH<sub>3</sub> (305.16043), y<sup>2+</sup> (322.18689), b<sup>2+</sup>-H<sub>2</sub>O (369.17569), y<sup>2+</sup>-NH<sub>3</sub> (376.19769), y<sup>3+</sup> (393.22437), y<sup>3+</sup> (605.37732), and y<sup>4+</sup> (706.42505).</p> |                                  |                                 |                 |      |   |   |           |            |
| 209529703                                                                                                                                                                                                                                                                                                                                                                                                                                                                                                                                                                                                                                                                                                                                                                                                                                | signal-regulatory protein beta-1 | GTAnLSETIR                      | N4(Deamidated)  | 2.27 | 0 | 2 | 531.77502 | 1062.54277 |

|                                                                                                                                                                                                                                                              |                                     |                      |                               |      |   |   |           |            |
|--------------------------------------------------------------------------------------------------------------------------------------------------------------------------------------------------------------------------------------------------------------|-------------------------------------|----------------------|-------------------------------|------|---|---|-----------|------------|
| <p>Extracted from: D:\YTian\MS data\Plasma_mile\Glyco_18.raw #17055 RT: 28.34<br/>FTMS, HCD@30.00, z=+2, Mono m/z=531.77496 Da, MH+=1062.54265 Da, Match Tol.=0.02 Da</p> 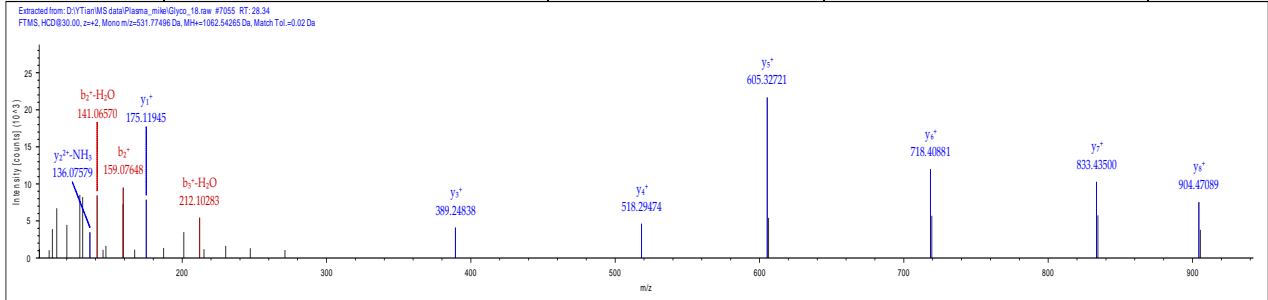 |                                     |                      |                               |      |   |   |           |            |
| 212549546                                                                                                                                                                                                                                                    | POTE ankyrin domain family member C | QLSEEQNTGISQD EILTnK | N18(Deamidated)               | 1.79 | 0 | 3 | 716.68616 | 2148.04392 |
| <p>Extracted from: D:\YTian\MS data\Plasma_mile\Glyco_20.raw #17843 RT: 28.51<br/>FTMS, HCD@30.00, z=+3, Mono m/z=716.68616 Da, MH+=2148.04392 Da, Match Tol.=0.02 Da</p>  |                                     |                      |                               |      |   |   |           |            |
| 221316616                                                                                                                                                                                                                                                    | extracellular matrix protein 1      | HIPGLIhnmTAR         | N8(Deamidated); M9(Oxidation) | 2.49 | 0 | 3 | 459.57489 | 1376.71012 |
| <p>Extracted from: D:\YTian\MS data\Plasma_mile\Glyco_1.raw #5617 RT: 22.92<br/>FTMS, HCD@30.00, z=+3, Mono m/z=459.57489 Da, MH+=1376.71012 Da, Match Tol.=0.02 Da</p>  |                                     |                      |                               |      |   |   |           |            |

|                                                                                   |                                                                    |                            |                                          |      |   |   |           |            |
|-----------------------------------------------------------------------------------|--------------------------------------------------------------------|----------------------------|------------------------------------------|------|---|---|-----------|------------|
| 223671930                                                                         | ADAM DEC1                                                          | EHAVFTSNQEEQD<br>PAnHTcGVK | N16(Deamidated);<br>C19(Carbamidomethyl) | 2.48 | 0 | 4 | 625.52692 | 2499.08584 |
| 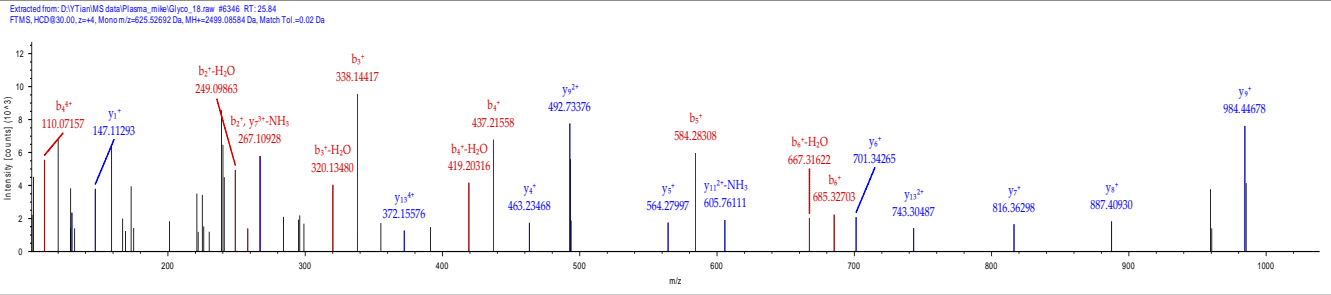 |                                                                    |                            |                                          |      |   |   |           |            |
| 240255535                                                                         | collagen alpha-3(VI) chain                                         | VAVVQHAPSESVD<br>nASmPPVK  | N14(Deamidated);<br>M17(Oxidation)       | 3.43 | 0 | 3 | 727.02985 | 2179.07499 |
|  |                                                                    |                            |                                          |      |   |   |           |            |
| 289547633                                                                         | leukocyte immunoglobulin-<br>like receptor subfamily A<br>member 3 | QPQAGLSQAnFTL<br>GPVSR     | N10(Deamidated)                          | 1.87 | 0 | 2 | 936.48334 | 1871.95940 |

|                                                                                                                                                                                                                                                         |                                                      |                               |                                                       |             |          |          |                             |
|---------------------------------------------------------------------------------------------------------------------------------------------------------------------------------------------------------------------------------------------------------|------------------------------------------------------|-------------------------------|-------------------------------------------------------|-------------|----------|----------|-----------------------------|
| <p>Extracted from: D:\VTianMS\data\Plasma_m\Glyco_18.raw #13831 RT: 50.39<br/>FTMS, HCD@30.00, z=+2, Mono m/z=936.48334 Da, MH+=1871.95840 Da, Match Tol.=0.02 Da</p> 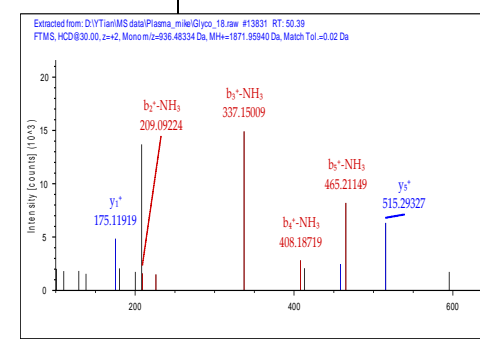   |                                                      |                               |                                                       |             |          |          |                             |
| <p>296010988</p>                                                                                                                                                                                                                                        | <p>multiple inositol polyphosphate phosphatase 1</p> | <p>FLTEVEK nATALYH VEA FK</p> | <p>N8(Deamidated)</p>                                 | <p>2.15</p> | <p>1</p> | <p>4</p> | <p>553.53778 2211.12929</p> |
| <p>Extracted from: D:\VTianMS\data\Plasma_m\Glyco_5.raw #16604 RT: 57.54<br/>FTMS, HCD@30.00, z=+4, Mono m/z=553.53778 Da, MH+=2211.12929 Da, Match Tol.=0.02 Da</p>    |                                                      |                               |                                                       |             |          |          |                             |
| <p>296080754</p>                                                                                                                                                                                                                                        | <p>fibrinogen beta chain</p>                         | <p>GTAGNAL mDGASQ LmGE nR</p> | <p>M8(Oxidation); M15(Oxidation); N18(Deamidated)</p> | <p>4.19</p> | <p>0</p> | <p>3</p> | <p>642.61646 1925.83481</p> |
| <p>Extracted from: D:\VTianMS\data\Plasma_m\Glyco_5.raw #12982 RT: 46.33<br/>FTMS, HCD@30.00, z=+2, Mono m/z=984.92401 Da, MH+=1968.84075 Da, Match Tol.=0.02 Da</p>  |                                                      |                               |                                                       |             |          |          |                             |



|                                                                                     |                                  |                                        |                                                       |      |   |   |           |            |
|-------------------------------------------------------------------------------------|----------------------------------|----------------------------------------|-------------------------------------------------------|------|---|---|-----------|------------|
| 307775422                                                                           | low-density lipoprotein receptor | LTGSDVnLLAENLL<br>SPEDmVLFHnLTQ<br>PR  | N7(Deamidated);<br>M19(Oxidation);<br>N24(Deamidated) | 2.57 | 0 | 3 | #####     | 3254.65281 |
| 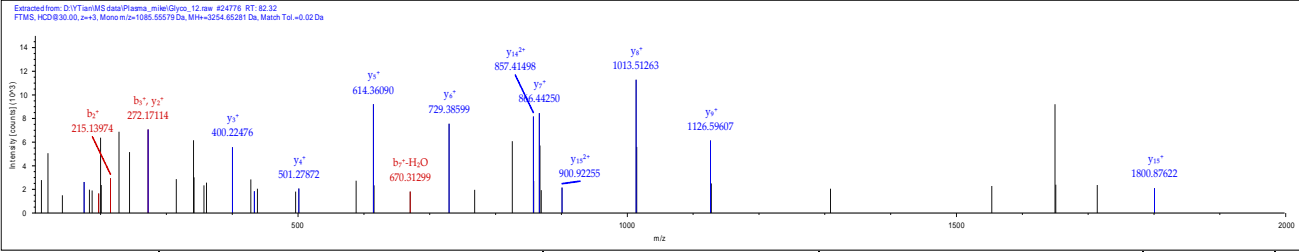  |                                  |                                        |                                                       |      |   |   |           |            |
| 310923191                                                                           | leptin receptor                  | YSEnSTTVIR                             | N4(Deamidated)                                        | 2.37 | 0 | 2 | 585.78632 | 1170.56536 |
|  |                                  |                                        |                                                       |      |   |   |           |            |
| 312433998                                                                           | lactotransferrin                 | TAGWNVPIGTLRP<br>FLnWTGPPEPIEAA<br>VAR | N16(Deamidated)                                       | 3.18 | 0 | 3 | #####     | 3231.69687 |

|                                                                                                                                                                                                                                                          |                                  |                                     |                                                 |             |          |          |                  |                   |
|----------------------------------------------------------------------------------------------------------------------------------------------------------------------------------------------------------------------------------------------------------|----------------------------------|-------------------------------------|-------------------------------------------------|-------------|----------|----------|------------------|-------------------|
| <p>Extracted from: D:\YuanMS\data\Plasma_mile\Glyco_17.nw #23447 RT: 78.68<br/>FTMS, HCD@30.00, z=3, Mono m/z=1077.90381 Da, MH+=3231.89687 Da, Match Tol.=0.02 Da</p> 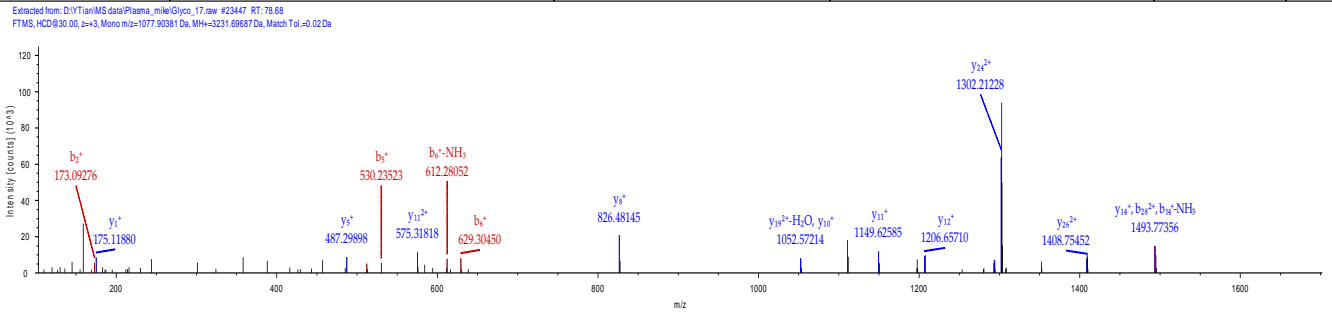 |                                  |                                     |                                                 |             |          |          |                  |                   |
| <p>315075331</p>                                                                                                                                                                                                                                         | <p>SAA2-SAA2 protein</p>         | <p>VYLQGLIDcYLFGr<br/>SSTVLEDSK</p> | <p>C9(Carbamidomethyl);<br/>N14(Deamidated)</p> | <p>5.58</p> | <p>0</p> | <p>3</p> | <p>874.75995</p> | <p>2622.26529</p> |
| <p>Extracted from: D:\YuanMS\data\Plasma_mile\Glyco_16.nw #25527 RT: 83.80<br/>FTMS, HCD@30.00, z=2, Mono m/z=1311.83135 Da, MH+=2622.25542 Da, Match Tol.=0.02 Da</p>  |                                  |                                     |                                                 |             |          |          |                  |                   |
| <p>324021743</p>                                                                                                                                                                                                                                         | <p>vitamin D-binding protein</p> | <p>LcDnLSTK</p>                     | <p>C2(Carbamidomethyl);<br/>N4(Deamidated)</p>  | <p>2.33</p> | <p>0</p> | <p>2</p> | <p>476.22592</p> | <p>951.44457</p>  |
| <p>Extracted from: D:\YuanMS\data\Plasma_mile\Glyco_1.nw #4943 RT: 20.54<br/>FTMS, HCD@30.00, z=2, Mono m/z=479.22635 Da, MH+=951.44452 Da, Match Tol.=0.02 Da</p>    |                                  |                                     |                                                 |             |          |          |                  |                   |

|                                                                                                                                                                                                                                                                                                                                                                                                                                                                                                                                                                                                                                                                                                                                                                                                                                                              |                                                             |                     |                |      |   |   |           |            |
|--------------------------------------------------------------------------------------------------------------------------------------------------------------------------------------------------------------------------------------------------------------------------------------------------------------------------------------------------------------------------------------------------------------------------------------------------------------------------------------------------------------------------------------------------------------------------------------------------------------------------------------------------------------------------------------------------------------------------------------------------------------------------------------------------------------------------------------------------------------|-------------------------------------------------------------|---------------------|----------------|------|---|---|-----------|------------|
| 333944020                                                                                                                                                                                                                                                                                                                                                                                                                                                                                                                                                                                                                                                                                                                                                                                                                                                    | cadherin-13                                                 | InNTHALVSLQLL<br>NK | N2(Deamidated) | 3.78 | 0 | 3 | 598.33600 | 1792.99344 |
| <p>Extracted from: D:\Y1\MS\data\Plasma_mile\Glyco_20 raw #17618 RT: 61.83<br/> FTMS, HCD@30.00, z=+3, Mono m/z=598.33600 Da, MH+=1792.99344 Da, Match Tol.=0.02 Da</p> <p>Mass spectrum showing intensity (counts) x 10<sup>3</sup> versus m/z. Key peaks are labeled:</p> <ul style="list-style-type: none"> <li>147.11299 (y1+)</li> <li>229.11896 (b2+)</li> <li>261.15604 (y2+)</li> <li>326.65625 (b2+)</li> <li>374.23969 (y3+)</li> <li>471.25146 (y4+-NH2)</li> <li>488.28360 (y4+)</li> <li>581.27277 (b3+)</li> <li>599.31610 (y5+-NH2)</li> <li>652.30548 (b4+)</li> <li>729.42633 (y4+)</li> <li>765.38904 (b3+)</li> <li>842.52240 (y5+)</li> <li>864.46143 (b4+)</li> <li>933.48022 (b4+-H2O)</li> <li>951.49475 (b4+)</li> <li>1028.60010 (y5+)</li> <li>1046.55750 (b5+-H2O)</li> <li>1064.57593 (b5+)</li> <li>1141.68884 (y6+)</li> </ul> |                                                             |                     |                |      |   |   |           |            |
| 336285443                                                                                                                                                                                                                                                                                                                                                                                                                                                                                                                                                                                                                                                                                                                                                                                                                                                    | neural cell adhesion molecule<br>1                          | DGQLLPSSnYSNIK      | N9(Deamidated) | 2.83 | 0 | 2 | 768.88025 | 1536.75322 |
| <p>Extracted from: D:\Y1\MS\data\Plasma_mile\Glyco_3 raw #11520 RT: 43.45<br/> FTMS, HCD@30.00, z=+2, Mono m/z=768.88074 Da, MH+=1536.75420 Da, Match Tol.=0.02 Da</p> <p>Mass spectrum showing intensity (counts) x 10<sup>3</sup> versus m/z. Key peaks are labeled:</p> <ul style="list-style-type: none"> <li>173.05521 (b2+)</li> <li>283.10306 (b2+-H2O)</li> <li>301.11429 (b3+)</li> <li>374.24017 (y3+)</li> <li>414.19870 (b4+)</li> <li>461.27292 (y4+)</li> <li>624.33850 (y5+, b4+)</li> <li>1010.48145 (y6+)</li> </ul>                                                                                                                                                                                                                                                                                                                        |                                                             |                     |                |      |   |   |           |            |
| 339882741                                                                                                                                                                                                                                                                                                                                                                                                                                                                                                                                                                                                                                                                                                                                                                                                                                                    | HLA class I histocompatibility<br>antigen, Cw-1 alpha chain | GYynQSEdGSHTL<br>QR | N4(Deamidated) | 2.57 | 0 | 3 | 585.92371 | 1755.75656 |

|                                                                                                                                                                                                                                                                 |                          |                              |                                                            |      |   |   |           |            |
|-----------------------------------------------------------------------------------------------------------------------------------------------------------------------------------------------------------------------------------------------------------------|--------------------------|------------------------------|------------------------------------------------------------|------|---|---|-----------|------------|
| <p>Extracted from: D:\Y\Tian\MS_data\Plasma_mile\Glyco_18.raw #6280 RT: 25.62<br/>FTMS, HCD@30.00, z=+3, Mono m/z=585.92371 Da, MH+=1755.75656 Da, Match Tol.=0.02 Da</p> 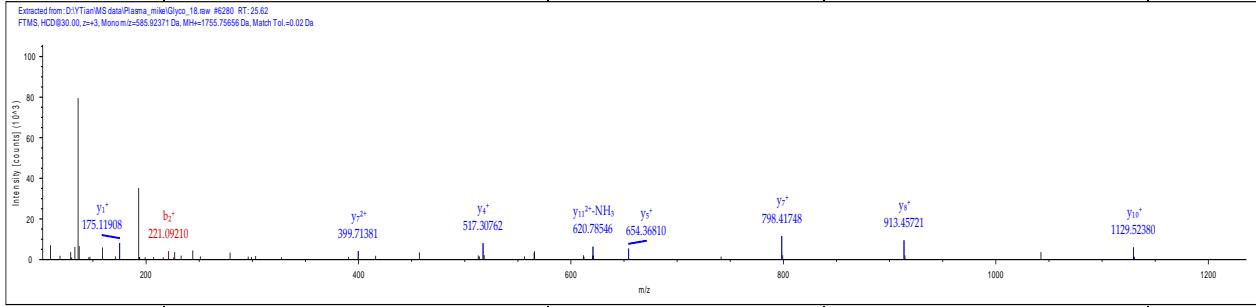    |                          |                              |                                                            |      |   |   |           |            |
| 371873523                                                                                                                                                                                                                                                       | apolipoprotein M         | TELFSSScPGGI mL<br>nETGQGYQR | C8(Carbamidomethyl);<br>M13(Oxidation);<br>N15(Deamidated) | 4.36 | 0 | 3 | 850.38135 | 2549.12949 |
| <p>Extracted from: D:\Y\Tian\MS_data\Plasma_mile\Glyco_12.raw #14854 RT: 52.35<br/>FTMS, HCD@30.00, z=+2, Mono m/z=1275.07080 Da, MH+=2549.13432 Da, Match Tol.=0.02 Da</p>   |                          |                              |                                                            |      |   |   |           |            |
| 384081581                                                                                                                                                                                                                                                       | protein crumbs homolog 1 | IDWNHITLENISSG<br>SSLnVK     | N18(Deamidated)                                            | 2.10 | 0 | 3 | 743.37384 | 2228.10697 |
| <p>Extracted from: D:\Y\Tian\MS_data\Plasma_mile\Glyco_14.raw #14155 RT: 50.82<br/>FTMS, HCD@30.00, z=+3, Mono m/z=743.37646 Da, MH+=2228.11484 Da, Match Tol.=0.02 Da</p>  |                          |                              |                                                            |      |   |   |           |            |

|                                                                                                                                                                                                                                                                |                                           |                     |                                     |      |   |   |           |            |
|----------------------------------------------------------------------------------------------------------------------------------------------------------------------------------------------------------------------------------------------------------------|-------------------------------------------|---------------------|-------------------------------------|------|---|---|-----------|------------|
| 384081596                                                                                                                                                                                                                                                      | cathepsin L1                              | YSVAnDTGFVDIPK      | N5(Deamidated)                      | 1.67 | 0 | 2 | 763.87305 | 1526.73882 |
| <p>Extracted from: D:\TianMS\data\Plasma_mile\Glyco_19.raw_#14145 RT: 50.80<br/> FTMS, HCD@30.00, z=+2, Mono m/z=763.87305 Da, MH+=15.26: 7.8682 Da, Match Tol.=0.02 Da</p> 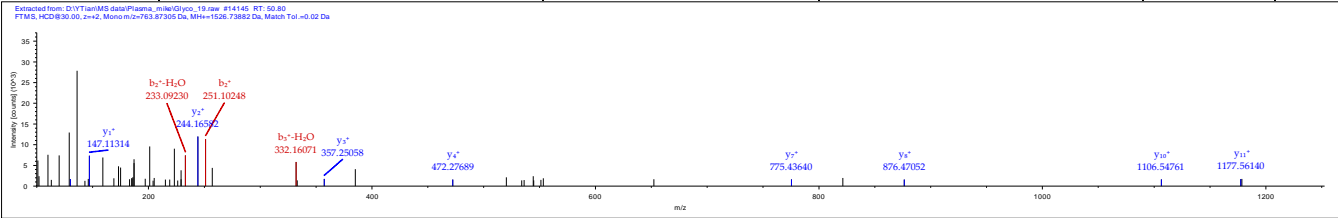 |                                           |                     |                                     |      |   |   |           |            |
| 385198102                                                                                                                                                                                                                                                      | coiled-coil domain-containing protein 74A | ENKDLHYKLIInnQT SQK | M11(Oxidation); N12(Deamidated)     | 1.81 | 2 | 4 | 527.52020 | 2107.05898 |
| <p>Extracted from: D:\TianMS\data\Plasma_mile\Glyco_1.raw_#19113 RT: 64.72<br/> FTMS, HCD@30.00, z=+3, Mono m/z=702.69617 Da, MH+=2106.07386 Da, Match Tol.=0.02 Da</p>      |                                           |                     |                                     |      |   |   |           |            |
| 388240759                                                                                                                                                                                                                                                      | zinc finger protein 267                   | AFnRSScLTQHQT HTGEK | N3(Deamidated); C7(Carbamidomethyl) | 2.15 | 1 | 3 | 735.34808 | 2204.02970 |
| <p>Extracted from: D:\TianMS\data\Plasma_mile\Glyco_1.raw_#9899 RT: 36.97<br/> FTMS, HCD@30.00, z=+3, Mono m/z=735.34808 Da, MH+=2204.02970 Da, Match Tol.=0.02 Da</p>     |                                           |                     |                                     |      |   |   |           |            |
| 397140020                                                                                                                                                                                                                                                      | ADAMTS-like protein 2-like                | DFTLNETVnSIFAQ GAPR | N9(Deamidated)                      | 2.61 | 0 | 3 | 660.99420 | 1980.96805 |

|                                                                                                                                                                                                                                                                                                                                                                                                                                                                                                                                                                                                                                                                                                                                                                                                                                                                                                                                                                                                                                                                 |                                       |                    |                 |      |   |   |           |            |
|-----------------------------------------------------------------------------------------------------------------------------------------------------------------------------------------------------------------------------------------------------------------------------------------------------------------------------------------------------------------------------------------------------------------------------------------------------------------------------------------------------------------------------------------------------------------------------------------------------------------------------------------------------------------------------------------------------------------------------------------------------------------------------------------------------------------------------------------------------------------------------------------------------------------------------------------------------------------------------------------------------------------------------------------------------------------|---------------------------------------|--------------------|-----------------|------|---|---|-----------|------------|
|                                                                                                                                                                                                                                                                                                                                                                                                                                                                                                                                                                                                                                                                                                                                                                                                                                                                                                                                                                                                                                                                 |                                       |                    |                 |      |   |   |           |            |
| <p>Extracted from: D:\YTIan\MS\data\Plasma_mile\Glyco_7.raw #21688 RT: 72.56<br/> FTMS, HCD@30.00, z=+3, Mono m/z=660.99420 Da, MH+=1980.96805 Da, Match Tol.=0.02 Da</p> 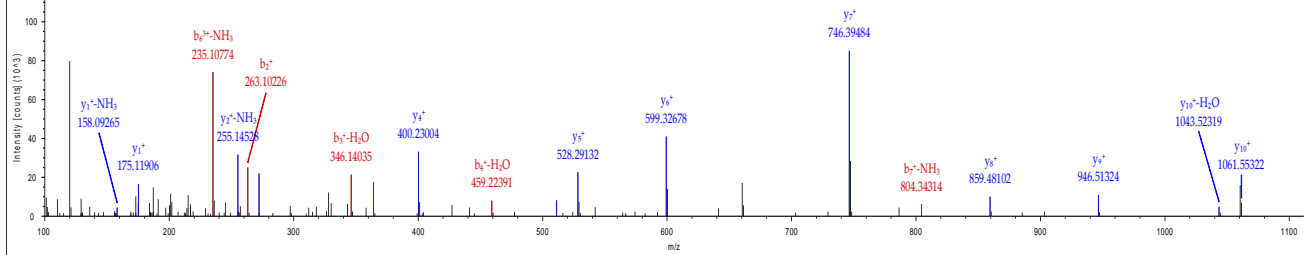 <p>Mass spectrum showing intensity (counts) vs m/z. Key peaks are labeled:</p> <ul style="list-style-type: none"> <li><math>y_1^+-NH_3</math> 158.09265</li> <li><math>y_1^+</math> 175.11906</li> <li><math>b_3^+-NH_3</math> 235.10774</li> <li><math>y_2^+-NH_3</math> 255.14526</li> <li><math>b_2^+</math> 263.11026</li> <li><math>b_1^+-H_2O</math> 346.14035</li> <li><math>y_4^+</math> 400.23004</li> <li><math>b_1^+-H_2O</math> 459.22391</li> <li><math>y_5^+</math> 528.29132</li> <li><math>y_6^+</math> 599.32678</li> <li><math>y_7^+</math> 746.39484</li> <li><math>b_7^+-NH_3</math> 804.34314</li> <li><math>y_8^+</math> 839.48102</li> <li><math>y_9^+</math> 946.51324</li> <li><math>y_{10}^+-H_2O</math> 1043.52319</li> <li><math>y_{10}^+</math> 1061.53322</li> </ul> |                                       |                    |                 |      |   |   |           |            |
| 514239920                                                                                                                                                                                                                                                                                                                                                                                                                                                                                                                                                                                                                                                                                                                                                                                                                                                                                                                                                                                                                                                       | complement component C8<br>beta chain | EYESYDFERnVTE<br>K | N11(Deamidated) | 2.27 | 1 | 3 | 632.94281 | 1896.81388 |
| <p>Extracted from: D:\YTIan\MS\data\Plasma_mile\Glyco_8.raw #11456 RT: 41.80<br/> FTMS, HCD@30.00, z=+3, Mono m/z=632.54281 Da, MH+=1896.81388 Da, Match Tol.=0.02 Da</p>  <p>Mass spectrum showing intensity (counts) vs m/z. Key peaks are labeled:</p> <ul style="list-style-type: none"> <li><math>y_1^+</math> 147.11308</li> <li><math>b_1^+-H_2O</math> 275.10226</li> <li><math>y_3^+</math> 377.20447</li> <li><math>y_4^+</math> 512.26074</li> <li><math>y_{10}^+</math> 613.28906</li> </ul>                                                                                                                                                                                                                                                                                                                                                                                                                                                                      |                                       |                    |                 |      |   |   |           |            |
| 530370892                                                                                                                                                                                                                                                                                                                                                                                                                                                                                                                                                                                                                                                                                                                                                                                                                                                                                                                                                                                                                                                       | tissue factor pathway<br>inhibitor    | YFYNnQTK           | N5(Deamidated)  | 1.76 | 0 | 2 | 539.74670 | 1078.48613 |
| <p>Extracted from: D:\YTIan\MS\data\Plasma_mile\Glyco_12.raw #6338 RT: 35.46<br/> FTMS, HCD@30.00, z=+2, Mono m/z=539.74670 Da, MH+=1078.48613 Da, Match Tol.=0.02 Da</p>  <p>Mass spectrum showing intensity (counts) vs m/z. Key peaks are labeled:</p> <ul style="list-style-type: none"> <li><math>y_1^+</math> 147.11288</li> <li><math>y_2^+</math> 248.16037</li> <li><math>y_5^+</math> 605.28925</li> <li><math>y_6^+</math> 768.35175</li> </ul>                                                                                                                                                                                                                                                                                                                                                                                                                                                                                                                  |                                       |                    |                 |      |   |   |           |            |

|                                                                                                                                                                                                                                                              |                                                      |                     |                                    |      |   |   |           |            |
|--------------------------------------------------------------------------------------------------------------------------------------------------------------------------------------------------------------------------------------------------------------|------------------------------------------------------|---------------------|------------------------------------|------|---|---|-----------|------------|
| 530371379                                                                                                                                                                                                                                                    | RNA-binding protein 44                               | LVMENRnLSSnSAK      | N7(Deamidated);<br>N11(Deamidated) | 2.14 | 1 | 2 | 782.88416 | 1564.76103 |
| <p>Extracted from: D:\YTian\MS data\Plasma_mile\Glyco_12.raw #9810 RT: 36.77<br/>FTMS, HCD@30.00, z=+2, Mono m/z=782.88416 Da, MH+=1564.76103 Da, Match Tol.=0.02 Da</p> 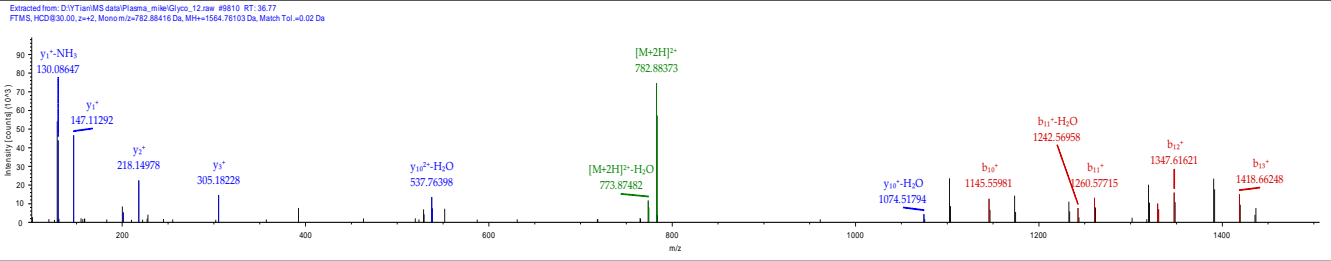   |                                                      |                     |                                    |      |   |   |           |            |
| 530372918                                                                                                                                                                                                                                                    | receptor-type tyrosine-<br>protein phosphatase gamma | SDFSQTmLFQAnT<br>TR | M7(Oxidation);<br>N12(Deamidated)  | 1.72 | 0 | 2 | 882.39893 | 1763.79057 |
| <p>Extracted from: D:\YTian\MS data\Plasma_mile\Glyco_12.raw #12875 RT: 45.72<br/>FTMS, HCD@30.00, z=+2, Mono m/z=882.39893 Da, MH+=1763.79057 Da, Match Tol.=0.02 Da</p>  |                                                      |                     |                                    |      |   |   |           |            |
| 530373850                                                                                                                                                                                                                                                    | follistatin-related protein 1                        | GSnYSEILDK          | N3(Deamidated)                     | 1.85 | 0 | 2 | 563.76794 | 1126.52861 |

|           |                                          |                        |                                        |      |   |   |           |            |
|-----------|------------------------------------------|------------------------|----------------------------------------|------|---|---|-----------|------------|
|           |                                          |                        |                                        |      |   |   |           |            |
|           |                                          |                        |                                        |      |   |   |           |            |
| 530374398 | fetuin-B                                 | VLYLAAYncTLRPV<br>SK   | N8(Deamidated);<br>C9(Carbamidomethyl) | 4.71 | 0 | 3 | 623.67084 | 1868.99796 |
|           |                                          |                        |                                        |      |   |   |           |            |
| 530375037 | phospholipid-metabolizing<br>enzyme A-C1 | MQLLKDVVGNDTY<br>RInnK | N16(Deamidated);<br>N17(Deamidated)    | 1.80 | 2 | 3 | 708.36713 | 2123.08683 |
|           |                                          |                        |                                        |      |   |   |           |            |

Extracted from: D:\YiTian\MS data\Plasma\_mile\Glyco\_19.raw #9488 RT: 36.17  
FTMS, HCD@30.00, z=+2, Mono m/z=563.76794 Da, MH+=1126.52861 Da, Match Tol.=0.02 Da

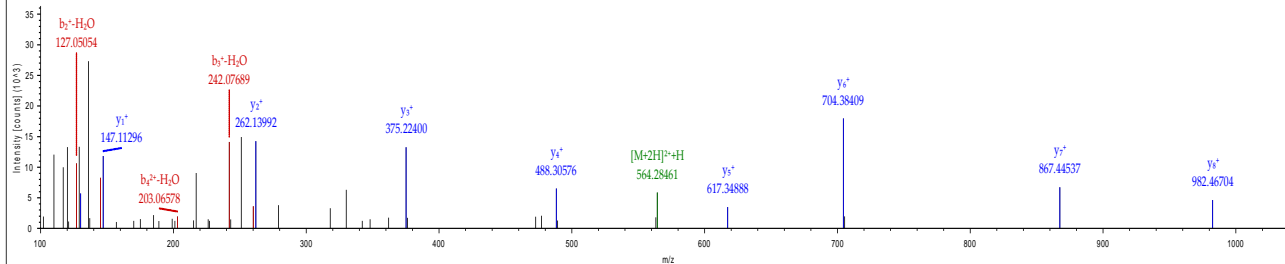

Extracted from: D:\YiTian\MS data\Plasma\_mile\Glyco\_1.raw #13189 RT: 47.11  
FTMS, HCD@30.00, z=+3, Mono m/z=623.66998 Da, MH+=1868.99540 Da, Match Tol.=0.02 Da

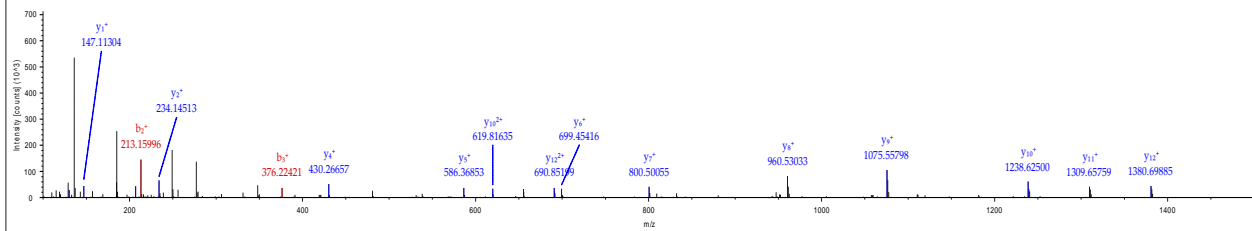

Extracted from: D:\YiTian\MS data\Plasma\_mile\Glyco\_13.raw #17178 RT: 60.89  
FTMS, HCD@30.00, z=+3, Mono m/z=708.36977 Da, MH+=2123.08474 Da, Match Tol.=0.02 Da

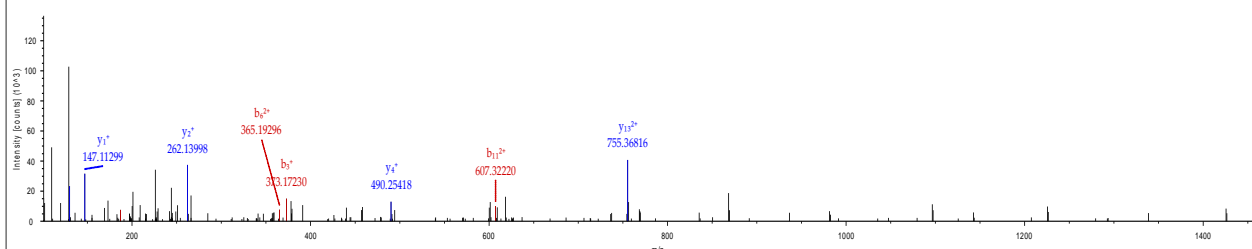



|                                                                                                                                                                                                                                                                                                                                                                                                                                                                                                                                                                                                                                                                                      |                       |                              |                                   |      |   |   |           |            |
|--------------------------------------------------------------------------------------------------------------------------------------------------------------------------------------------------------------------------------------------------------------------------------------------------------------------------------------------------------------------------------------------------------------------------------------------------------------------------------------------------------------------------------------------------------------------------------------------------------------------------------------------------------------------------------------|-----------------------|------------------------------|-----------------------------------|------|---|---|-----------|------------|
| 530375091                                                                                                                                                                                                                                                                                                                                                                                                                                                                                                                                                                                                                                                                            | cholinesterase        | DnNSIITR                     | N2(Deamidated)                    | 2.42 | 0 | 2 | 467.23557 | 933.46385  |
| <p>Extracted from: D:\YTian\MS data\Plasma_mile\Glyco_1.raw #5659 RT: 23.06<br/> FTMS, HCD@30.00, z=+2, Mono m/z=467.23557 Da, MH=933.46385 Da, Match Tol.=0.02 Da</p> <p>Mass spectrum showing intensity (counts) versus m/z. The x-axis ranges from 100 to 800 m/z. The y-axis ranges from 0 to 150 intensity (counts) x 10^3. The base peak is at m/z 389.25018 (y3+). Other labeled peaks include: y1+ (175.11885), y1+-NH3 (158.09251), b2+ (231.06099), y2+-NH3 (259.13983), y2+ (276.16620), b1+-H2O (327.09222), b1+ (345.10284), y3+-NH3 (372.22412), b1+-H2O (414.12535), b1+ (432.13596), y4+ (502.33380), y5+ (589.36597), y2+-NH3 (686.38385), and y3+ (703.40875).</p> |                       |                              |                                   |      |   |   |           |            |
| 530376005                                                                                                                                                                                                                                                                                                                                                                                                                                                                                                                                                                                                                                                                            | limbin                | mLLQnYSKIQENVE<br>ELMDFFQASK | M1(Oxidation);<br>N5(Deamidated)  | 1.66 | 1 | 3 | 974.80542 | 2922.40171 |
| <p>Extracted from: D:\YTian\MS data\Plasma_mile\Glyco_5.raw #7824 RT: 30.46<br/> FTMS, HCD@30.00, z=+3, Mono m/z=974.80542 Da, MH=2922.40171 Da, Match Tol.=0.02 Da</p> <p>Mass spectrum showing intensity (counts) versus m/z. The x-axis ranges from 0 to 1600 m/z. The y-axis ranges from 0 to 800 intensity (counts) x 10^3. The base peak is at m/z 731.35712 (b2+-H2O). Other labeled peaks include: y1+ (147.11302), y2+ (487.21298), y2+ (543.73842), b1+ (617.29218), y12+ (722.34399), b12+ (740.37604), b2+-H2O (731.35712), and b2+-H2O (1461.71130).</p>                                                                                                                |                       |                              |                                   |      |   |   |           |            |
| 530376359                                                                                                                                                                                                                                                                                                                                                                                                                                                                                                                                                                                                                                                                            | ADP-ribosyl cyclase 2 | DSSGVIHVmLnGSE<br>PTGAYPIK   | M9(Oxidation);<br>N11(Deamidated) | 2.24 | 0 | 3 | 763.70636 | 2289.10453 |
| <p>Extracted from: D:\YTian\MS data\Plasma_mile\Glyco_3.raw #13246 RT: 48.93<br/> FTMS, HCD@30.00, z=+3, Mono m/z=763.70752 Da, MH=2289.10801 Da, Match Tol.=0.02 Da</p> <p>Mass spectrum showing intensity (counts) versus m/z. The x-axis ranges from 0 to 1200 m/z. The y-axis ranges from 0 to 20 intensity (counts) x 10^3. The base peak is at m/z 357.24976 (y3+). Other labeled peaks include: y1+ (147.11333), b1+ (203.06630), b1+-H2O (272.08826), y2+ (423.73795), y4+ (520.31775), b1+ (559.28577), y4+ (648.37292), b1+ (696.33124), y5+ (749.40955), and b1+ (795.40442).</p>                                                                                         |                       |                              |                                   |      |   |   |           |            |

|                                                                                                                                                                                                                                                               |                                  |                                 |                 |      |   |   |           |            |
|---------------------------------------------------------------------------------------------------------------------------------------------------------------------------------------------------------------------------------------------------------------|----------------------------------|---------------------------------|-----------------|------|---|---|-----------|------------|
| 530377712                                                                                                                                                                                                                                                     | ecto-ADP-ribosyltransferase<br>3 | ITLIPLNEVFQVSQE<br>GAGNNLILQSIK | N27(Deamidated) | 1.96 | 0 | 3 | #####     | 3053.64511 |
| <p>Extracted from: D:\Y1\an1MS\data\Plasma_mile\Glyco_1.raw #25148 RT: 83.44<br/> FTMS, HCD@30.00, z=+3, Mono m/z=1018.55322 Da, MH+=3053.64511 Da, Match Tol.=0.02 Da</p> 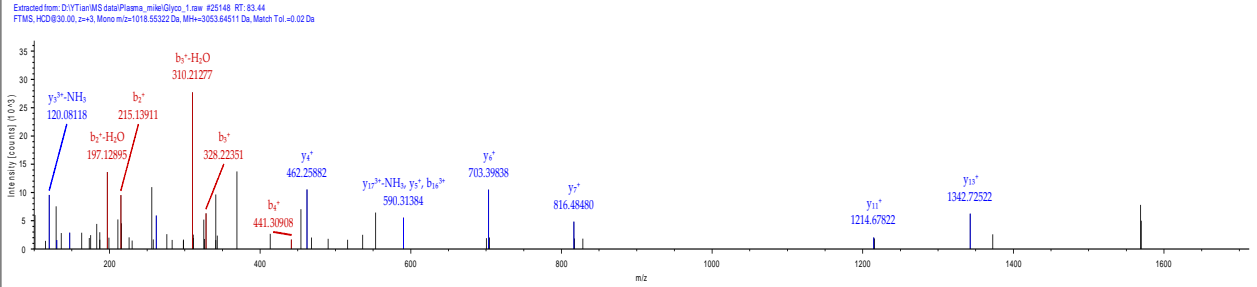 |                                  |                                 |                 |      |   |   |           |            |
| 530378934                                                                                                                                                                                                                                                     | complement component C6          | VLnFTTK                         | N3(Deamidated)  | 1.98 | 0 | 2 | 412.23163 | 823.45598  |
| <p>Extracted from: D:\Y1\an1MS\data\Plasma_mile\Glyco_17.raw #7912 RT: 30.84<br/> FTMS, HCD@30.00, z=+2, Mono m/z=412.23166 Da, MH+=823.45594 Da, Match Tol.=0.02 Da</p>    |                                  |                                 |                 |      |   |   |           |            |
| 530379903                                                                                                                                                                                                                                                     | protein-lysine 6-oxidase         | RDPGAAVPGAAnA<br>SAQQPR         | N12(Deamidated) | 3.14 | 1 | 3 | 612.31036 | 1834.91654 |

|                                                                                                                                                                                                                                                             |                                         |                |                 |      |   |   |           |            |
|-------------------------------------------------------------------------------------------------------------------------------------------------------------------------------------------------------------------------------------------------------------|-----------------------------------------|----------------|-----------------|------|---|---|-----------|------------|
| <p>Extracted from: D:\VTian\MS data\Plasma_m\ne\Glyco_7.raw #5707 RT: 23.40<br/>FTMS, HCD@30.00, z=+3, Mono m/z=612.31036 Da, MH+=1834.91654 Da, Match Tol.=0.02 Da</p> 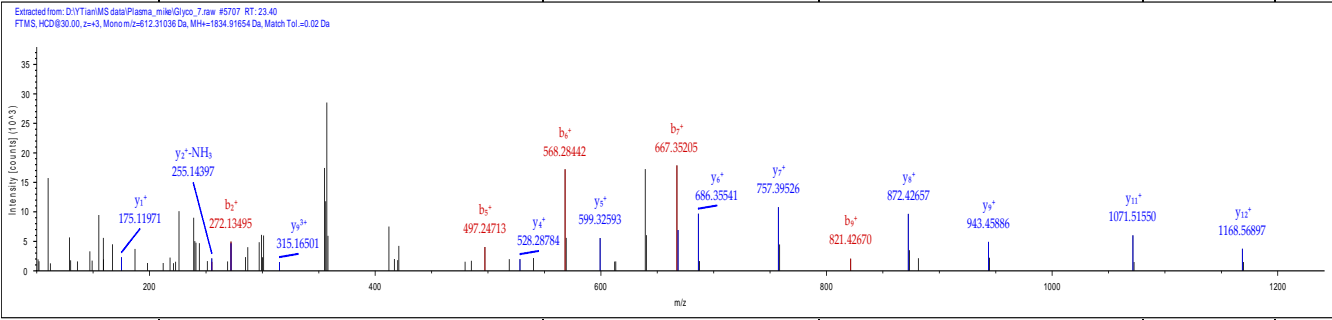  |                                         |                |                 |      |   |   |           |            |
| 530381557                                                                                                                                                                                                                                                   | probable G-protein coupled receptor 116 | ANEQVVQSLnQTYK | N10(Deamidated) | 2.04 | 0 | 2 | 811.90436 | 1622.80144 |
| <p>Extracted from: D:\VTian\MS data\Plasma_m\ne\Glyco_20.raw #9616 RT: 36.62<br/>FTMS, HCD@30.00, z=+2, Mono m/z=811.90436 Da, MH+=1622.80144 Da, Match Tol.=0.02 Da</p>  |                                         |                |                 |      |   |   |           |            |
| 530383020                                                                                                                                                                                                                                                   | CD109 antigen                           | HLnGTITAK      | N3(Deamidated)  | 1.60 | 0 | 2 | 478.26404 | 955.52080  |
| <p>Extracted from: D:\VTian\MS data\Plasma_m\ne\Glyco_2.raw #3840 RT: 16.50<br/>FTMS, HCD@30.00, z=+2, Mono m/z=476.21930 Da, MH+=955.52080 Da, Match Tol.=0.02 Da</p>  |                                         |                |                 |      |   |   |           |            |
| 530384408                                                                                                                                                                                                                                                   | transmembrane glycoprotein NMB          | nDRNSSDETFLK   | N1(Deamidated)  | 2.09 | 1 | 3 | 476.21930 | 1426.64334 |

|                                                                                                                                                                                                                                                              |                                              |                        |                                                                                              |             |          |          |                  |                   |
|--------------------------------------------------------------------------------------------------------------------------------------------------------------------------------------------------------------------------------------------------------------|----------------------------------------------|------------------------|----------------------------------------------------------------------------------------------|-------------|----------|----------|------------------|-------------------|
| <p>Extracted from: D:\Y\Tian\MS\data\Plasma_mile\Glyco_18.raw #5901 RT: 24.26<br/>FTMS, HCD@30.00, z=+3, Mono m/z=476.21930 Da, MH+=1426.6434 Da, Match Tol.=0.02 Da</p> 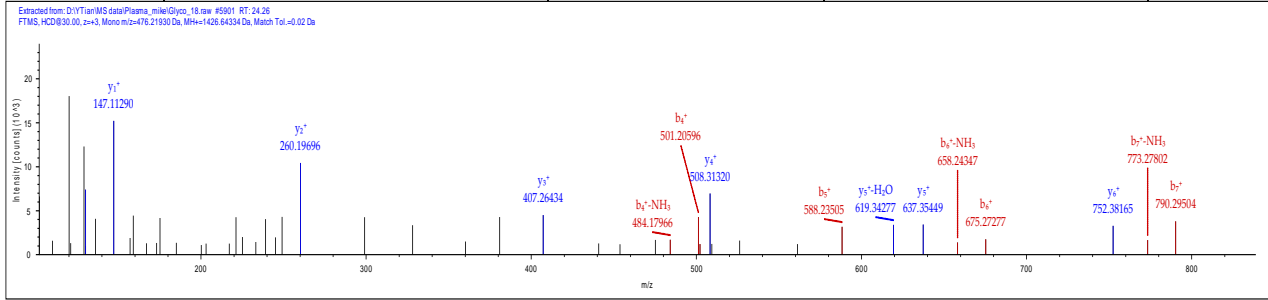  |                                              |                        |                                                                                              |             |          |          |                  |                   |
| <p>530384873</p>                                                                                                                                                                                                                                             | <p>up-regulator of cell proliferation</p>    | <p>cLLEnIRnGLSnQnK</p> | <p>C1(Carbamidomethyl); N5(Deamidated); N8(Deamidated); N12(Deamidated); N14(Deamidated)</p> | <p>2.10</p> | <p>1</p> | <p>2</p> | <p>888.93005</p> | <p>1776.85283</p> |
| <p>Extracted from: D:\Y\Tian\MS\data\Plasma_mile\Glyco_7.raw #16642 RT: 57.61<br/>FTMS, HCD@30.00, z=+2, Mono m/z=888.93005 Da, MH+=1776.85283 Da, Match Tol.=0.02 Da</p>  |                                              |                        |                                                                                              |             |          |          |                  |                   |
| <p>530388287</p>                                                                                                                                                                                                                                             | <p>peroxidasin homolog (Drosophila)-like</p> | <p>VDSAlnSTR</p>       | <p>N6(Deamidated)</p>                                                                        | <p>1.66</p> | <p>0</p> | <p>2</p> | <p>482.23929</p> | <p>963.47130</p>  |
| <p>Extracted from: D:\Y\Tian\MS\data\Plasma_mile\Glyco_7.raw #4877 RT: 20.36<br/>FTMS, HCD@30.00, z=+2, Mono m/z=482.23929 Da, MH+=963.47130 Da, Match Tol.=0.02 Da</p>  |                                              |                        |                                                                                              |             |          |          |                  |                   |

|                                                                                                                                                                                                                                                                                                                                                                                                                                                                                                                                                                                                                                                                                                                                                                                                                                          |                                                                  |                |                                     |      |   |   |           |            |
|------------------------------------------------------------------------------------------------------------------------------------------------------------------------------------------------------------------------------------------------------------------------------------------------------------------------------------------------------------------------------------------------------------------------------------------------------------------------------------------------------------------------------------------------------------------------------------------------------------------------------------------------------------------------------------------------------------------------------------------------------------------------------------------------------------------------------------------|------------------------------------------------------------------|----------------|-------------------------------------|------|---|---|-----------|------------|
| 530389137                                                                                                                                                                                                                                                                                                                                                                                                                                                                                                                                                                                                                                                                                                                                                                                                                                | ectonucleotide pyrophosphatase/phosphodiesterase family member 2 | AllAnLTcK      | N5(Deamidated); C8(Carbamidomethyl) | 1.85 | 0 | 2 | 502.77780 | 1004.54833 |
| <p>Extracted from: D:\YTIanMS\data\Plasma_mile\Glyco_2.raw #9317 RT: 35.27<br/>FTMS, HCD@30.00, z=+2, Mono m/z=502.77780 Da, MH+=1004.54833 Da, Match Tol.=0.02 Da</p> <p>Mass spectrum showing relative intensity (0-50) versus m/z (100-800). Key peaks are labeled: <math>y_1^+</math> (147.11293), <math>y_1^+-NH_3</math> (130.08659), <math>b_2^+, b_3^+</math> (185.12854), <math>y_2^+</math> (307.14270), <math>y_3^+</math> (408.19122), <math>y_4^+</math> (521.27582), <math>y_5^+</math> (636.30133), <math>y_6^+</math> (707.34338), <math>y_7^+</math> (820.42157).</p>                                                                                                                                                                                                                                                   |                                                                  |                |                                     |      |   |   |           |            |
| 530391083                                                                                                                                                                                                                                                                                                                                                                                                                                                                                                                                                                                                                                                                                                                                                                                                                                | tenascin C                                                       | LLETVEYnISGAER | N8(Deamidated)                      | 3.31 | 0 | 2 | 797.90253 | 1594.79778 |
| <p>Extracted from: D:\YTIanMS\data\Plasma_mile\Glyco_12.raw #14122 RT: 50.15<br/>FTMS, HCD@30.00, z=+2, Mono m/z=797.90131 Da, MH+=1594.79534 Da, Match Tol.=0.02 Da</p> <p>Mass spectrum showing relative intensity (0-100) versus m/z (200-1400). Key peaks are labeled: <math>y_1^+</math> (175.11934), <math>b_2^+</math> (227.17569), <math>b_1^+</math> (356.21924), <math>y_1^+</math> (432.22458), <math>y_1^+-H_2O</math> (439.25745), <math>y_2^+-NH_3</math> (502.22739), <math>y_2^+</math> (519.25171), <math>y_3^+</math> (632.33752), <math>y_4^+</math> (747.36426), <math>y_5^+</math> (910.42950), <math>y_6^+</math> (1039.46863), <math>y_6^+-H_2O</math> (1021.44373), <math>y_7^+</math> (1138.54224), <math>y_8^+</math> (1239.58728), <math>y_8^+-H_2O</math> (1350.60510), <math>y_9^+</math> (1368.63403).</p> |                                                                  |                |                                     |      |   |   |           |            |
| 530391227                                                                                                                                                                                                                                                                                                                                                                                                                                                                                                                                                                                                                                                                                                                                                                                                                                | Golgi membrane protein 1                                         | AVLVNnITTGER   | N6(Deamidated)                      | 3.00 | 0 | 2 | 644.34979 | 1287.69231 |
| <p>Extracted from: D:\YTIanMS\data\Plasma_mile\Glyco_6.raw #9521 RT: 35.70<br/>FTMS, HCD@30.00, z=+2, Mono m/z=644.84235 Da, MH+=1288.67742 Da, Match Tol.=0.02 Da</p> <p>Mass spectrum showing relative intensity (0-20) versus m/z (100-1000). Key peaks are labeled: <math>b_2^+</math> (171.11284), <math>y_1^+</math> (175.11940), <math>b_1^+</math> (284.19632), <math>y_3^+</math> (563.27966), <math>y_4^+</math> (676.36334), <math>y_5^+</math> (791.38800), <math>y_6^+</math> (906.41754), <math>y_7^+</math> (1005.48376).</p>                                                                                                                                                                                                                                                                                             |                                                                  |                |                                     |      |   |   |           |            |

|                                                                                                                                                                          |                   |                            |                                                                 |      |   |   |           |            |
|--------------------------------------------------------------------------------------------------------------------------------------------------------------------------|-------------------|----------------------------|-----------------------------------------------------------------|------|---|---|-----------|------------|
| 530393969                                                                                                                                                                | protein FAM178A   | KQnDIIPGKNNLSN<br>VENGHLNR | N3(Deamidated)                                                  | 1.73 | 2 | 3 | 816.75928 | 2448.26328 |
| <p>Extracted from: D:\YTIanMS\data\Plasma_mike\Glyco_2.raw #18485 RT: 63.72<br/>FTMS, HCD@30.00, z=+3, Mono m/z=816.75928 Da, MH+=2448.26328 Da, Match Tol.=0.02 Da</p>  |                   |                            |                                                                 |      |   |   |           |            |
| 530394351                                                                                                                                                                | multimerin-2      | FnTTYInIGSSYFPE<br>HGYFR   | N2(Deamidated);<br>N7(Deamidated)                               | 4.27 | 0 | 3 | 805.71039 | 2415.11661 |
| <p>Extracted from: D:\YTIanMS\data\Plasma_mike\Glyco_8.raw #18388 RT: 62.85<br/>FTMS, HCD@30.00, z=+3, Mono m/z=805.37518 Da, MH+=2414.11100 Da, Match Tol.=0.02 Da</p>  |                   |                            |                                                                 |      |   |   |           |            |
| 530396058                                                                                                                                                                | CD59 glycoprotein | TAVncSSDFDAcLIT<br>K       | N4(Deamidated);<br>C5(Carbamidomethyl);<br>C12(Carbamidomethyl) | 2.63 | 0 | 2 | 901.89807 | 1802.78887 |
| <p>Extracted from: D:\YTIanMS\data\Plasma_mike\Glyco_20.raw #12603 RT: 46.14<br/>FTMS, HCD@30.00, z=+2, Mono m/z=901.89807 Da, MH+=1802.78887 Da, Match Tol.=0.02 Da</p> |                   |                            |                                                                 |      |   |   |           |            |

|                                                                                                                                                                                                                                                                                                                                                                                                                                                                                                                                                                                                                                                                                                 |                                 |                                          |                                                                |      |   |   |           |            |
|-------------------------------------------------------------------------------------------------------------------------------------------------------------------------------------------------------------------------------------------------------------------------------------------------------------------------------------------------------------------------------------------------------------------------------------------------------------------------------------------------------------------------------------------------------------------------------------------------------------------------------------------------------------------------------------------------|---------------------------------|------------------------------------------|----------------------------------------------------------------|------|---|---|-----------|------------|
| 530396179                                                                                                                                                                                                                                                                                                                                                                                                                                                                                                                                                                                                                                                                                       | interleukin-18-binding protein  | ALVLEQLTPALHST<br>nFScVLVDPEQVVQ<br>R    | N15(Deamidated);<br>C18(Carbamidomethyl)                       | 5.58 | 0 | 3 | #####     | 3264.68845 |
| <p>Extracted from: D:\Y1\anMS\data\P1ama_mh\G1\c1_12.raw #21833 RT: 73.33<br/>FTMS, HCD@30.00, z=+3, Mono m/z=1088.90398 Da, MH+=3264.69468 Da, Match Tol.=0.02 Da</p> <p>Intensity (count) [10<sup>3</sup>]</p> <p>m/z</p> <p>Peak list (m/z): 185.12865 (b<sup>1+</sup>), 284.19681 (b<sup>2+</sup>), 371.19257 (y<sup>2+</sup>-NH<sub>3</sub>), 402.24567 (y<sup>3+</sup>), 629.37415 (y<sup>4+</sup>), 855.46875 (y<sup>5+</sup>), 970.49359 (y<sup>6+</sup>), 1089.56433 (y<sup>7+</sup>), 1182.64868 (y<sup>10+</sup>)</p>                                                                                                                                                                |                                 |                                          |                                                                |      |   |   |           |            |
| 530398815                                                                                                                                                                                                                                                                                                                                                                                                                                                                                                                                                                                                                                                                                       | complement C1s<br>subcomponent  | NcGVncSGDVFTAL<br>IGEIASPNYPKPYP<br>ENSR | C2(Carbamidomethyl);<br>N5(Deamidated);<br>C6(Carbamidomethyl) | 7.21 | 0 | 4 | 882.66107 | 3527.62246 |
| <p>Extracted from: D:\Y1\anMS\data\P1ama_mh\G1\c1_1.raw #24287 RT: 80.71<br/>FTMS, HCD@30.00, z=+3, Mono m/z=1177.21045 Da, MH+=3528.61679 Da, Match Tol.=0.02 Da</p> <p>Intensity (count) [10<sup>4</sup>]</p> <p>m/z</p> <p>Peak list (m/z): 120.08143 (y<sup>3+</sup>-H<sub>2</sub>O), 276.06461 (b<sup>2+</sup>), 333.08682 (b<sup>3+</sup>), 399.15234 (b<sup>1+</sup>-NH<sub>3</sub>), 432.15567 (b<sup>4+</sup>), 547.18536 (b<sup>5+</sup>), 602.29327 (y<sup>5+</sup>), 731.86298 (y<sup>11+</sup>), 810.89569 (y<sup>14+</sup>), 862.40540 (y<sup>7+</sup>), 960.47522 (y<sup>12+</sup>), 1087.55652 (y<sup>8+</sup>), 1462.69519 (y<sup>12+</sup>), 1919.90686 (y<sup>17+</sup>)</p> |                                 |                                          |                                                                |      |   |   |           |            |
| 530402456                                                                                                                                                                                                                                                                                                                                                                                                                                                                                                                                                                                                                                                                                       | copper-transporting ATPase<br>2 | SIEDRISnLKGIIsm<br>K                     | N8(Deamidated);<br>M15(Oxidation)                              | 1.80 | 2 | 3 | 607.66986 | 1820.99503 |

|                                                                                                                                                                                                                                                             |                                  |                            |                                                                        |      |   |   |           |            |
|-------------------------------------------------------------------------------------------------------------------------------------------------------------------------------------------------------------------------------------------------------------|----------------------------------|----------------------------|------------------------------------------------------------------------|------|---|---|-----------|------------|
|                                                                                                                                                                                                                                                             |                                  |                            |                                                                        |      |   |   |           |            |
| <p>Extracted from: D:\YTI\MS data\Plasma_mile\Glyco_3.raw #17881 RT: 63.73<br/>FTMS, HCD@30.00, z=+3, Mono m/z=607.6688 Da, MH+=1820.99603 Da, Match Tol.=0.02 Da</p>     |                                  |                            |                                                                        |      |   |   |           |            |
| 530403906                                                                                                                                                                                                                                                   | plasma serine protease inhibitor | VVGVPYQGnATAL<br>FILPSEGK  | N9(Deamidated)                                                         | 3.61 | 0 | 2 | #####     | 2161.15532 |
| <p>Extracted from: D:\YTI\MS data\Plasma_mile\Glyco_1.raw #19837 RT: 66.94<br/>FTMS, HCD@30.00, z=+2, Mono m/z=1081.08167 Da, MH+=2161.15605 Da, Match Tol.=0.02 Da</p>   |                                  |                            |                                                                        |      |   |   |           |            |
| 530406451                                                                                                                                                                                                                                                   | katanin p80 subunit B-like 1     | ISnFTnKnmK                 | N3(Deamidated);<br>N6(Deamidated);<br>N8(Deamidated);<br>M9(Oxidation) | 1.70 | 1 | 2 | 608.28174 | 1215.55620 |
| <p>Extracted from: D:\YTI\MS data\Plasma_mile\Glyco_13.raw #7627 RT: 30.21<br/>FTMS, HCD@30.00, z=+2, Mono m/z=608.28174 Da, MH+=1215.55620 Da, Match Tol.=0.02 Da</p>  |                                  |                            |                                                                        |      |   |   |           |            |
| 530414045                                                                                                                                                                                                                                                   | endothelial lipase               | IEQNATnTFLVYTE<br>EDLGDLLK | N7(Deamidated)                                                         | 2.40 | 0 | 3 | 843.08545 | 2527.24179 |



|                                                                                                                                                                                                                                                              |                             |                          |                 |      |   |   |           |            |
|--------------------------------------------------------------------------------------------------------------------------------------------------------------------------------------------------------------------------------------------------------------|-----------------------------|--------------------------|-----------------|------|---|---|-----------|------------|
| <p>Extracted from: D:\YITianMS\data\Plasma_m\m\Glyco_1.raw #25643 RT: 85.03<br/>FTMS, HCD@30.00, z=+3, Mono m/z=843.0845 Da, MH+=2527.24179 Da, Match Tol.=0.02 Da</p> 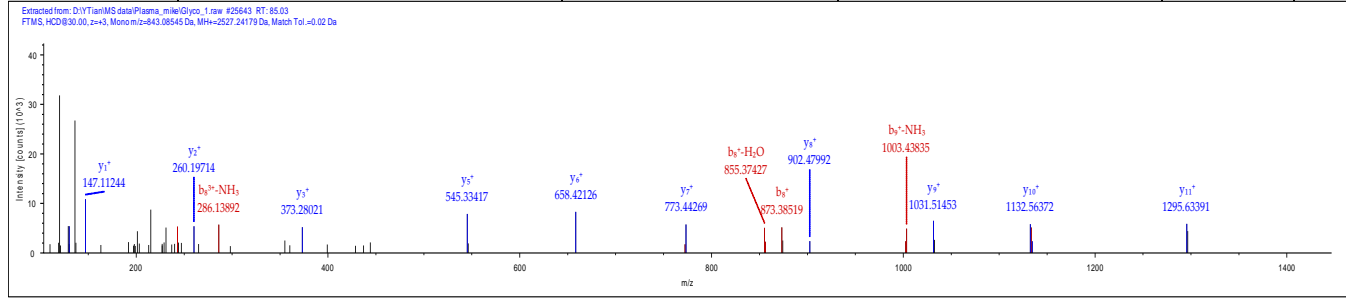     |                             |                          |                 |      |   |   |           |            |
| 530415917                                                                                                                                                                                                                                                    | multiple EGF-like-domains 8 | ALLTnVSSVALGSR           | N5(Deamidated)  | 2.57 | 0 | 2 | 694.89203 | 1388.77678 |
| <p>Extracted from: D:\YITianMS\data\Plasma_m\m\Glyco_19.raw #14835 RT: 52.92<br/>FTMS, HCD@30.00, z=+2, Mono m/z=694.89203 Da, MH+=1388.77678 Da, Match Tol.=0.02 Da</p>    |                             |                          |                 |      |   |   |           |            |
| 530422745                                                                                                                                                                                                                                                    | coagulation factor VIII     | NLFLTnLDNLHENN<br>THNQEK | N13(Deamidated) | 2.19 | 0 | 4 | 603.04126 | 2409.14321 |
| <p>Extracted from: D:\YITianMS\data\Plasma_m\m\Glyco_11.raw #11625 RT: 43.50<br/>FTMS, HCD@30.00, z=+4, Mono m/z=603.04126 Da, MH+=2409.14321 Da, Match Tol.=0.02 Da</p>  |                             |                          |                 |      |   |   |           |            |
| 530423914                                                                                                                                                                                                                                                    | phosphatidylcholine-sterol  | AELSnHTRPVILVP           | N5(Deamidated); | 6.42 | 0 | 4 | 655.10059 | 2617.38051 |

|           |                                                                                                                                                                                                                                                                                                                                                                                                                                                                                                                                                                                                                                                                                                                                                                                                                                                                                                           |             |                      |      |   |   |           |            |
|-----------|-----------------------------------------------------------------------------------------------------------------------------------------------------------------------------------------------------------------------------------------------------------------------------------------------------------------------------------------------------------------------------------------------------------------------------------------------------------------------------------------------------------------------------------------------------------------------------------------------------------------------------------------------------------------------------------------------------------------------------------------------------------------------------------------------------------------------------------------------------------------------------------------------------------|-------------|----------------------|------|---|---|-----------|------------|
|           | acyltransferase                                                                                                                                                                                                                                                                                                                                                                                                                                                                                                                                                                                                                                                                                                                                                                                                                                                                                           | GcLGNQLEAK  | C16(Carbamidomethyl) |      |   |   |           |            |
|           | <p>Extracted from: D:\YTari\MS data\Plasma_mile\Glyco_10.aw #13172 RT: 48.45<br/> FTMS, HCD@30.00, z=+4, Mono m/z=655.10022 Da, MH+=2617.37955 Da, Match Tol.=0.02 Da</p> <p>Intensity [counts] (10<sup>3</sup>) vs m/z. Key peaks: <math>y_1^+-NH_3</math> (130.08681), <math>y_2^+-NH_3</math> (172.10828), <math>b_2^+, b_3^+</math> (201.08737), <math>y_2^+</math> (218.15025), <math>b_1^+</math> (314.17233), <math>y_3^+-H_2O</math> (329.18170), <math>y_4^+</math> (460.27780), <math>b_4^+</math> (510.28680), <math>b_5^+</math> (533.78418), <math>b_1^{2+}</math> (610.32617), <math>b_2^{2+}</math> (666.86847), <math>y_1^+</math> (759.40063), <math>b_3^{2+}</math> (716.40295), <math>b_{1+}^+-NH_3, y_{3+}^+</math> (1089.54565), <math>b_{1+}^+</math> (1089.54565), <math>b_{1+}^+</math> (1219.64795), <math>b_{1+}^+</math> (1332.72754), <math>b_{1+}^+</math> (1431.79626).</p> |             |                      |      |   |   |           |            |
| 530425806 | major prion protein                                                                                                                                                                                                                                                                                                                                                                                                                                                                                                                                                                                                                                                                                                                                                                                                                                                                                       | GEEnFTETDVK | N3(Deamidated)       | 2.81 | 0 | 2 | 570.75751 | 1140.50774 |
|           | <p>Extracted from: D:\YTari\MS data\Plasma_mile\Glyco_20.aw #6295 RT: 25.52<br/> FTMS, HCD@30.00, z=+2, Mono m/z=570.75787 Da, MH+=1140.50847 Da, Match Tol.=0.02 Da</p> <p>Intensity [counts] (10<sup>3</sup>) vs m/z. Key peaks: <math>y_1^+</math> (147.11267), <math>b_2^+</math> (187.07126), <math>y_2^+</math> (246.18098), <math>b_3^+</math> (302.09802), <math>b_5^+-H_2O</math> (284.08701), <math>y_3^+</math> (361.20584), <math>y_4^+</math> (462.25620), <math>y_5^+-H_2O</math> (573.28888), <math>y_5^+</math> (591.29834), <math>y_5^+-H_2O</math> (533.22992), <math>y_6^+</math> (692.34576), <math>y_7^+</math> (839.41559), <math>y_8^+-H_2O</math> (936.41553), <math>y_8^+</math> (954.44269).</p>                                                                                                                                                                                |             |                      |      |   |   |           |            |
| 530426931 | coagulation factor X                                                                                                                                                                                                                                                                                                                                                                                                                                                                                                                                                                                                                                                                                                                                                                                                                                                                                      | GDNnLTR     | N4(Deamidated)       | 1.93 | 0 | 2 | 395.68787 | 790.36846  |
|           | <p>Extracted from: D:\YTari\MS data\Plasma_mile\Glyco_1.aw #3518 RT: 15.22<br/> FTMS, HCD@30.00, z=+2, Mono m/z=395.68787 Da, MH+=790.36846 Da, Match Tol.=0.02 Da</p> <p>Intensity [counts] (10<sup>3</sup>) vs m/z. Key peaks: <math>y_1^+-NH_3</math> (158.09265), <math>b_2^+</math> (173.05597), <math>y_1^+</math> (175.11925), <math>y_2^+-NH_3</math> (259.13983), <math>y_2^+</math> (276.16699), <math>y_3^+</math> (389.25095), <math>y_4^+</math> (504.27853), <math>y_5^+-NH_3</math> (601.29529), <math>y_5^+</math> (618.32178).</p>                                                                                                                                                                                                                                                                                                                                                       |             |                      |      |   |   |           |            |

|                                                                                                                                                                                                                                                               |                                                              |                    |                 |      |   |   |           |            |
|---------------------------------------------------------------------------------------------------------------------------------------------------------------------------------------------------------------------------------------------------------------|--------------------------------------------------------------|--------------------|-----------------|------|---|---|-----------|------------|
| 530426969                                                                                                                                                                                                                                                     | lysosome-associated membrane glycoprotein 1                  | GHTLTLnFTR         | N7(Deamidated)  | 2.66 | 0 | 3 | 387.54001 | 1160.60547 |
| <p>Extracted from: D:\Y\Tian\MS data\Plasma_mile\Glyco_1.raw #9405 RT: 35.37<br/> FTMS, HCD@30.00, z=+3, Mono m/z=387.53967 Da, MH+=1160.60447 Da, Match Tol.=0.02 Da</p> 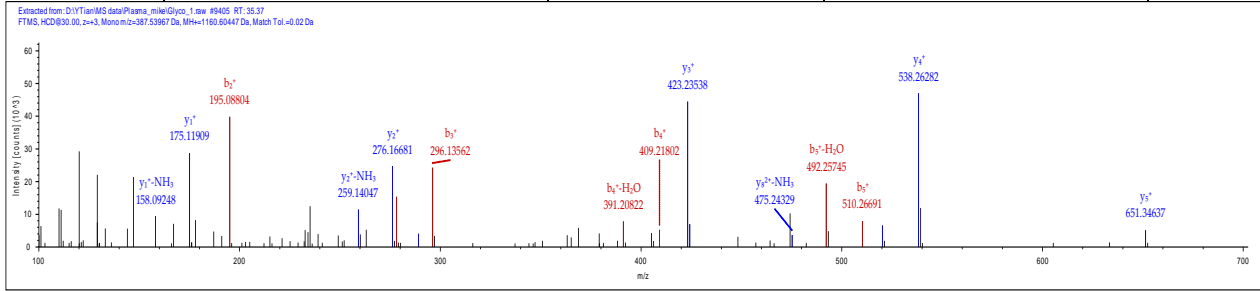  |                                                              |                    |                 |      |   |   |           |            |
| 544346180                                                                                                                                                                                                                                                     | plexin domain-containing protein 2                           | VnLSFDFFPYGHFL R   | N2(Deamidated)  | 2.20 | 0 | 3 | 620.64355 | 1859.91611 |
| <p>Extracted from: D:\Y\Tian\MS data\Plasma_mile\Glyco_2.raw #21133 RT: 71.95<br/> FTMS, HCD@30.00, z=+3, Mono m/z=620.64355 Da, MH+=1859.91611 Da, Match Tol.=0.02 Da</p>  |                                                              |                    |                 |      |   |   |           |            |
| 546231210                                                                                                                                                                                                                                                     | serine/threonine-protein phosphatase 4 regulatory subunit 3A | SFLFEPVVKAFLLn GSR | N14(Deamidated) | 1.84 | 1 | 3 | 642.67615 | 1926.01389 |



|                                                                                                                                                                                                                                                           |                                                          |                                     |                       |             |          |          |                  |                   |
|-----------------------------------------------------------------------------------------------------------------------------------------------------------------------------------------------------------------------------------------------------------|----------------------------------------------------------|-------------------------------------|-----------------------|-------------|----------|----------|------------------|-------------------|
|                                                                                                                                                                                                                                                           |                                                          |                                     |                       |             |          |          |                  |                   |
| <p>Extracted from: D:\Y1anMS\data\Plasma_mile\Glyco_2.raw #10907 RT: 40.32<br/>FTMS, HCD@30.00, z=+2, Mono m/z=571.75043 Da, MH+=1142.49358 Da, Match Tol.=0.02 Da</p> 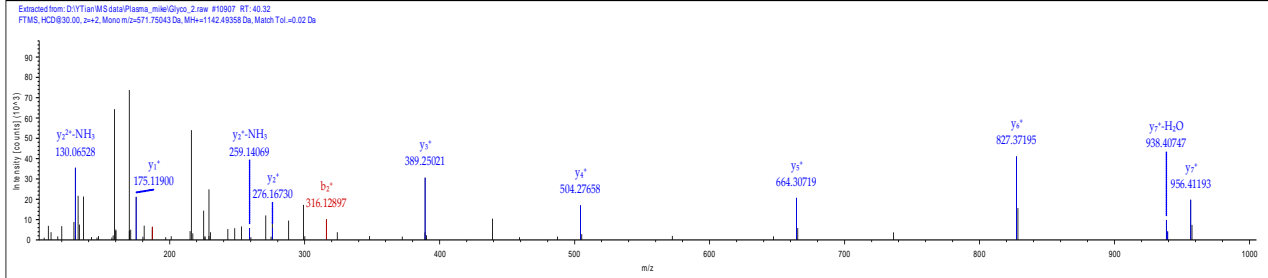 | <p>IP100384938<br/>.1</p> <p>uncharacterized protein</p> | <p>EEQYnSTYR</p>                    | <p>N5(Deamidated)</p> | <p>2.47</p> | <p>0</p> | <p>2</p> | <p>595.75201</p> | <p>1190.49675</p> |
| <p>Extracted from: D:\Y1anMS\data\Plasma_mile\Glyco_5.raw #4798 RT: 18.69<br/>FTMS, HCD@30.00, z=+2, Mono m/z=595.75256 Da, MH+=1190.49788 Da, Match Tol.=0.02 Da</p>   | <p>IP100418153<br/>.1</p> <p>uncharacterized protein</p> | <p>EEQYnSTFR</p>                    | <p>N5(Deamidated)</p> | <p>2.19</p> | <p>0</p> | <p>2</p> | <p>587.75427</p> | <p>1174.50127</p> |
| <p>Extracted from: D:\Y1anMS\data\Plasma_mile\Glyco_5.raw #8228 RT: 31.21<br/>FTMS, HCD@30.00, z=+2, Mono m/z=587.75287 Da, MH+=1174.49846 Da, Match Tol.=0.02 Da</p>  | <p>IP100789376<br/>.4</p> <p>KNG1 protein</p>            | <p>HGIQYFNnNTQHS<br/>SLFTLNVEVK</p> | <p>N8(Deamidated)</p> | <p>6.68</p> | <p>0</p> | <p>3</p> | <p>864.75476</p> | <p>2592.24973</p> |

|                   |                                                                                    |                              |                                         |      |          |       |           |            |
|-------------------|------------------------------------------------------------------------------------|------------------------------|-----------------------------------------|------|----------|-------|-----------|------------|
|                   |                                                                                    |                              |                                         |      |          |       |           |            |
| IPI00929530<br>.1 | Adipocyte plasma membrane-associated protein                                       | AGPnGTLFVADAY<br>K           | N4(Deamidated)                          | 3.32 | 0        | 2     | 712.85651 | 1424.70574 |
|                   | 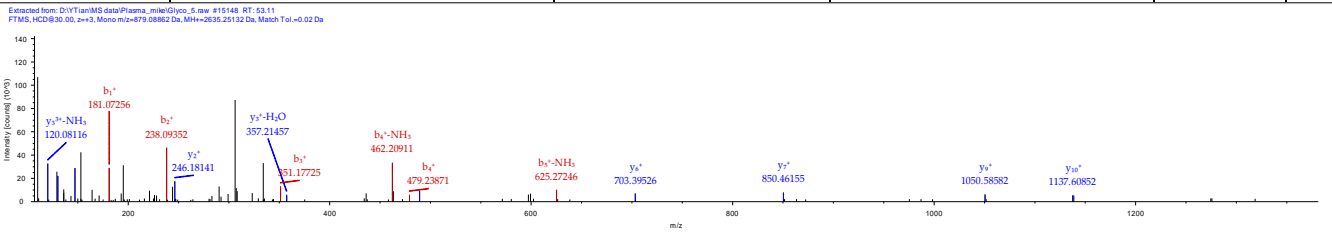  |                              |                                         |      |          |       |           |            |
| IPI00930442<br>.1 | uncharacterized protein                                                            | eEQFnSTYR                    | N-Term(Carbamyl);<br>N5(Deamidated)     | 2.53 | 0        | 2     | 609.25732 | 1217.50737 |
|                   |   |                              |                                         |      |          |       |           |            |
| 561721137.<br>2   | phosphatidylcholine-sterol<br>acyltransferase                                      | AELSnHTRPVILVP<br>GcLGNQLEAK | N5(Deamidated);<br>C16(Carbamidomethyl) | 2.92 | 0.131868 | 1.956 | 715.00605 | 1457.77095 |
|                   |  |                              |                                         |      |          |       |           |            |

Extracted from: D:\YTian\MS data\Plasma\_mike\Glyco\_11.saw #13274 RT: 48.58  
FTMS, HCD (30.00, z=4, Mono m/z=655.09987 Da, M4+=2617.37885 Da, Match Tol.=0.02 Da)

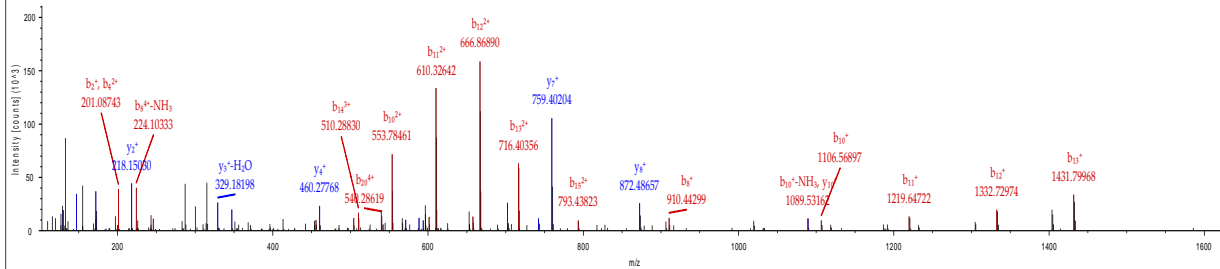

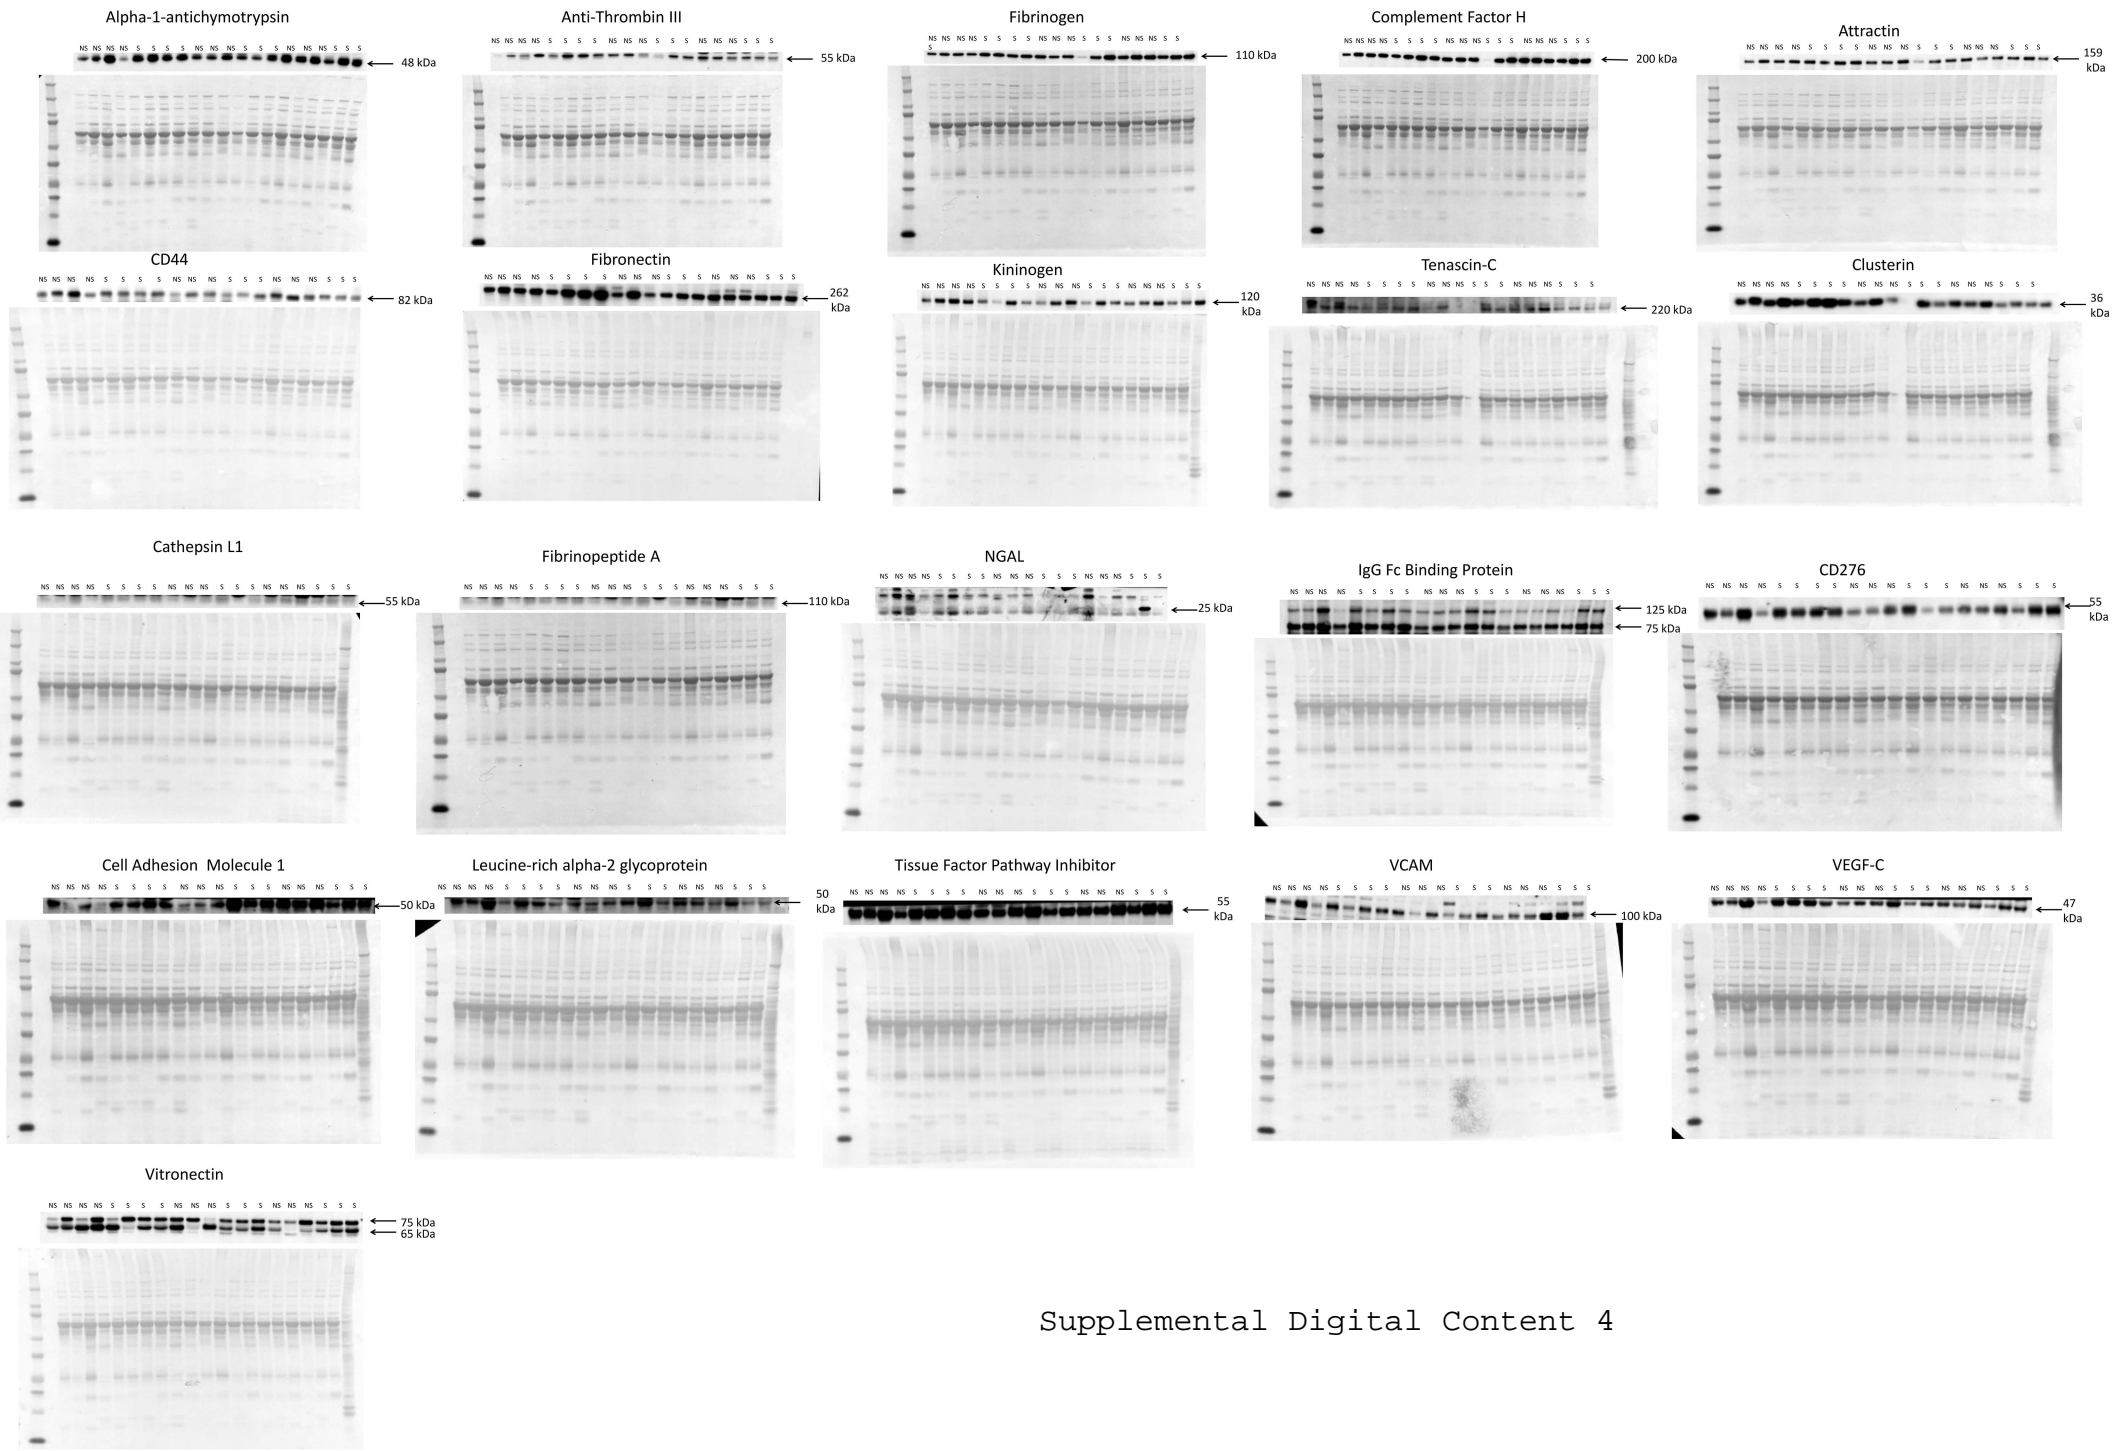



### Alpha-1-antichymotrypsin

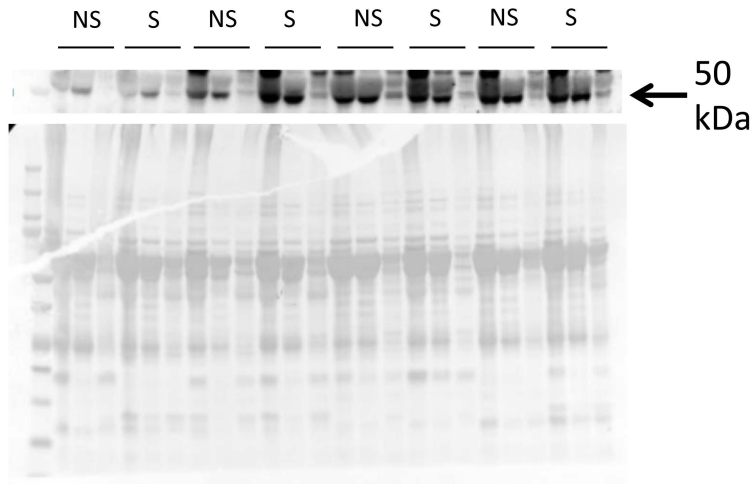

### Attractin

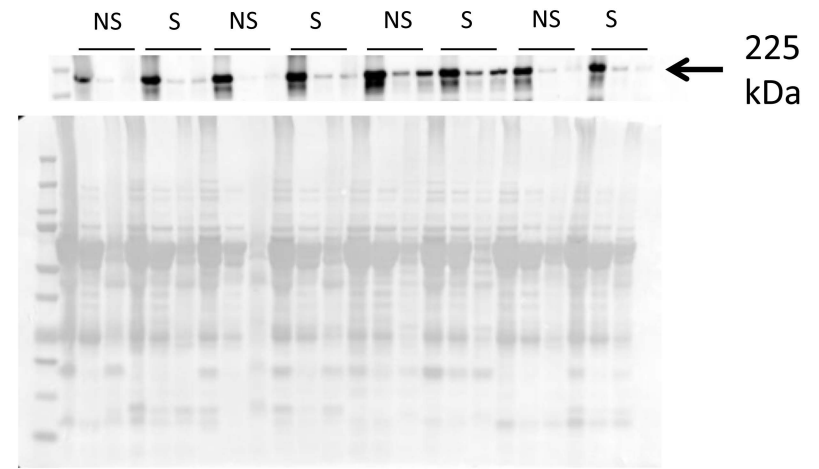

### Clusterin

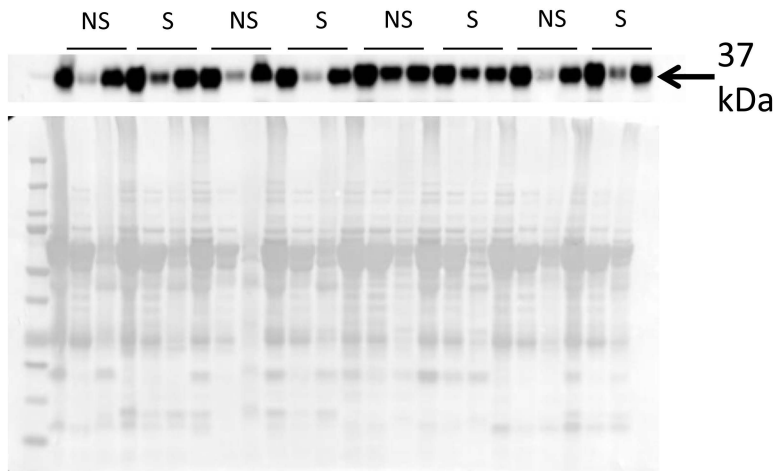

### Tenascin-C

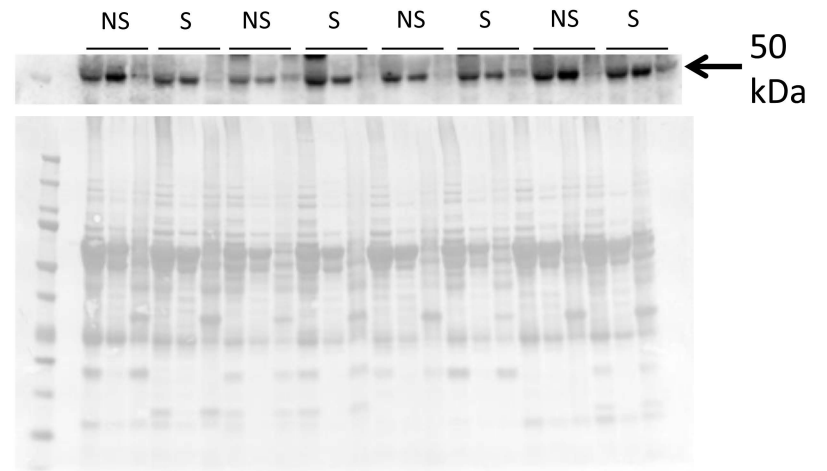

## Supplemental Digital Content 6. Common and survivor GOBPs

---

### Biological Process

Acute inflammatory response

Response to wounding

Defense response

Positive regulation of immune system process

---

### Protein

Complement factor I  
Complement C4-B

Complement C5  
Complement component C7

Complement component C8 beta chain  
Plasma protease C1 inhibitor

Cell adhesion molecule 1

---

Biological processes and proteins overlapping between survivors and the common response are listed.

## Supplemental Digital Content 7. Common and non-survivor GOBPs

---

### Biological Process

Acute inflammatory response

Defense response

Positive regulation of immune  
system process

Response to wounding

---

### Protein

Lipopolysaccharide-binding protein

Pantetheinase

Transferrin receptor protein 1

Lactotransferrin

Hemopexin

IL-6 signal transducer

Kininogen-1

---

Biological processes and proteins overlapping between non-survivors and the common response are listed.

**Supplemental Digital Content 8.** Kyoto Encyclopedia of Genes and Genomes pathways enriched in survivors (black) and non-survivors (gray)

---

|                                   |                                                                                                                                                                                                                                       |
|-----------------------------------|---------------------------------------------------------------------------------------------------------------------------------------------------------------------------------------------------------------------------------------|
| Complement & coagulation cascades | Coagulation factor V, Complement C4-B, Complement C5, Complement C7, Complement component C8 beta chain, Tissue factor pathway inhibitor, Plasma protease C1 inhibitor<br><br>Coagulation factor VIII, Anti-thrombin-III, Kininogen 1 |
| Cell adhesion molecules           | CD276, Cell adhesion molecule 1, HLA class I histocompatibility histocompatability antigen Cw-1 alpha chain, L-selectin, Vascular cell adhesion molecule 1                                                                            |
| ECM-receptor interaction          | Fibronectin, Reelin, Tenascin C, Vitronectin                                                                                                                                                                                          |
| Focal adhesion                    | Fibronectin, Reelin, Tenascin C, Vitronectin                                                                                                                                                                                          |
| Prion diseases                    | Complement C5, Complement C7, Complement C8 beta chain                                                                                                                                                                                |
| Systemic lupus erythematosus      | Complement C4-B, Complement C5, Complement C7, Complement C8 beta chain                                                                                                                                                               |
